# Supplementary material for: Improved estimation of lake greenhouse gas emissions in China based on nutrients and potential benefits from eutrophication controls
Source: Research Square preprint supplement (doi:10.21203/rs.3.rs-4318310/v1), 2024-05-06
Supplement: Supplementary file 1 [file 067fda5469be75ab2e577982.xlsx]

## Sheet: Sheet1
Abatement measures	TN unit reduction cost ($/t)	TP unit reduction cost ($/t)	Research site	References
Wastewater treatment	3090.85	14076.1	Kuopion vesi, Lehtoniemi （Finnish Lake Kallavesi）	Nutrient load compensation as a means of maintaining the good ecological status of surface waters
Wastewater treatment	6393.19	7366.56	Lapinlahden Vesi Oy, village center	Nutrient load compensation as a means of maintaining the good ecological status of surface waters
Wastewater treatment	5498.64	28757.6	Iisalmen vesi	Nutrient load compensation as a means of maintaining the good ecological status of surface waters
Wastewater treatment	39792.8	187942	City of Kiuruvesi	Nutrient load compensation as a means of maintaining the good ecological status of surface waters
Wastewater treatment	600581	842234	Municipality of Sonkajarvi	Nutrient load compensation as a means of maintaining the good ecological status of surface waters
Wastewater treatment	111332	503932	Municipality of Lapinlahti, Varpaisjarvi	Nutrient load compensation as a means of maintaining the good ecological status of surface waters
Wastewater treatment	755055	3.69939e+06	Runnin ymparistohuolto Oy	Nutrient load compensation as a means of maintaining the good ecological status of surface waters
Wastewater treatment	530072	1.07977e+06	Kuopion vesi, Kurkimaki	Nutrient load compensation as a means of maintaining the good ecological status of surface waters
Wastewater treatment	330342	2.7135e+06	Municipality of Leppavirta, Oravikoski	Nutrient load compensation as a means of maintaining the good ecological status of surface waters
Wastewater treatment	733713	5.03883e+06	Neuron	Nutrient load compensation as a means of maintaining the good ecological status of surface waters
Wastewater treatment	1.39864e+06		Yla-Savo Vocational College, Peltosalmi	Nutrient load compensation as a means of maintaining the good ecological status of surface waters
4R stewardship or tillage		84500	water quality and wildlife habitat（U.S. Watersheds）	Watershed abatement costs for agricultural phosphorus
4R stewardship or tillage		20630	Central Plains （regions with negligible, low and moderate loading potentials ）	Watershed abatement costs for agricultural phosphorus
4R stewardship or tillage		23670	West Coast（regions having cropland in the ‘‘high’’ and ‘‘very high’’ loading categories.）	Watershed abatement costs for agricultural phosphorus
Construct buffer zone	3960		the Uusimaa and Varsinais-Suomi provinces	Abatement costs for agricultural nitrogen and phosphorus loads: a case study of South-Western Finland
4R stewardship or tillage	6424	25696	Finnish agriculture	Abatement costs for agricultural nitrogen and phosphorus loads: a case study of South-Western Finland
4R stewardship or tillage	178690		North Savo region	Nutrient load compensation as a means of maintaining the good ecological status of surface waters
Construct buffer zone	174.7	13181.8	The Waituna catchment (46◦34’ S 168◦36’ E)	Evaluating nutrient abatement policies for a pastorally farmed catchment-lagoon ecosystem: A New Zealand case study
Construct buffer zone	147	10000	The Waituna catchment (46◦34’ S 168◦36’ E)	Evaluating nutrient abatement policies for a pastorally farmed catchment-lagoon ecosystem: A New Zealand case study
Construct buffer zone	149.7	10370.4	The Waituna catchment (46◦34’ S 168◦36’ E)	Evaluating nutrient abatement policies for a pastorally farmed catchment-lagoon ecosystem: A New Zealand case study
4R stewardship or tillage	456.4	35294.1	The Waituna catchment (46◦34’ S 168◦36’ E)	Evaluating nutrient abatement policies for a pastorally farmed catchment-lagoon ecosystem: A New Zealand case study
4R stewardship or tillage	255.9	16585.4	The Waituna catchment (46◦34’ S 168◦36’ E)	Evaluating nutrient abatement policies for a pastorally farmed catchment-lagoon ecosystem: A New Zealand case study
4R stewardship or tillage	221.2	11886.8	The Waituna catchment (46◦34’ S 168◦36’ E)	Evaluating nutrient abatement policies for a pastorally farmed catchment-lagoon ecosystem: A New Zealand case study
Construct buffer zone	10700		Baltic sea basins	Cost-effectiveness of mussel farming as a water quality improvement measure: Agricultural, environmental and market drivers
Construct buffer zone	15836		an experimental farm in Skive fjord	Mussels as a tool for mitigation of nutrients in the marine environment
4R stewardship or tillage	3745		Danish coastal	Mussels as a tool for mitigation of nutrients in the marine environment
4R stewardship or tillage	8667		Danish coastal	Mussels as a tool for mitigation of nutrients in the marine environment
4R stewardship or tillage	12198		Danish coastal	Mussels as a tool for mitigation of nutrients in the marine environment
4R stewardship or tillage	11663		Danish coastal	Mussels as a tool for mitigation of nutrients in the marine environment
Construct buffer zone	11663		Danish coastal	Mussels as a tool for mitigation of nutrients in the marine environment
Wastewater treatment	31886		Sweden	Hydro-economic modelling of cost-effective transboundary water quality management in the Baltic Sea
Wastewater treatment	51467		Finland	Hydro-economic modelling of cost-effective transboundary water quality management in the Baltic Sea
Wastewater treatment	89987		Russia	Hydro-economic modelling of cost-effective transboundary water quality management in the Baltic Sea
Wastewater treatment	91271		Estonia	Hydro-economic modelling of cost-effective transboundary water quality management in the Baltic Sea
Wastewater treatment	23540		Latvia	Hydro-economic modelling of cost-effective transboundary water quality management in the Baltic Sea
Wastewater treatment	17441		Lithuania	Hydro-economic modelling of cost-effective transboundary water quality management in the Baltic Sea
Wastewater treatment	22684		Poland	Hydro-economic modelling of cost-effective transboundary water quality management in the Baltic Sea
Wastewater treatment	14362503		Germany	Hydro-economic modelling of cost-effective transboundary water quality management in the Baltic Sea
Wastewater treatment	141668		Baltic littoral countries	Hydro-economic modelling of cost-effective transboundary water quality management in the Baltic Sea
Wastewater treatment	41623		Baltic littoral countries	Hydro-economic modelling of cost-effective transboundary water quality management in the Baltic Sea
Wastewater treatment		106251	Sweden	Hydro-economic modelling of cost-effective transboundary water quality management in the Baltic Sea
Wastewater treatment		215284	Finland	Hydro-economic modelling of cost-effective transboundary water quality management in the Baltic Sea
Wastewater treatment		235721	Russia	Hydro-economic modelling of cost-effective transboundary water quality management in the Baltic Sea
Wastewater treatment		297781	Estonia	Hydro-economic modelling of cost-effective transboundary water quality management in the Baltic Sea
Wastewater treatment		103897	Latvia	Hydro-economic modelling of cost-effective transboundary water quality management in the Baltic Sea
Wastewater treatment		67731	Lithuania	Hydro-economic modelling of cost-effective transboundary water quality management in the Baltic Sea
Wastewater treatment		61525	Poland	Hydro-economic modelling of cost-effective transboundary water quality management in the Baltic Sea
Wastewater treatment		52183686	Denmark	Hydro-economic modelling of cost-effective transboundary water quality management in the Baltic Sea
Wastewater treatment		406493	Germany	Hydro-economic modelling of cost-effective transboundary water quality management in the Baltic Sea
Wastewater treatment		121980	Baltic littoral countries	Hydro-economic modelling of cost-effective transboundary water quality management in the Baltic Sea
4R stewardship or tillage	1284		Sweden	Hydro-economic modelling of cost-effective transboundary water quality management in the Baltic Sea
4R stewardship or tillage	1391		Denmark	Hydro-economic modelling of cost-effective transboundary water quality management in the Baltic Sea
4R stewardship or tillage	1284		Baltic littoral countries	Hydro-economic modelling of cost-effective transboundary water quality management in the Baltic Sea
Livestock reductions	169809		Sweden	Hydro-economic modelling of cost-effective transboundary water quality management in the Baltic Sea
Livestock reductions	265788		Sweden	Hydro-economic modelling of cost-effective transboundary water quality management in the Baltic Sea
Livestock reductions	222988		Finland	Hydro-economic modelling of cost-effective transboundary water quality management in the Baltic Sea
Livestock reductions	127223		Finland	Hydro-economic modelling of cost-effective transboundary water quality management in the Baltic Sea
Livestock reductions	48578		Russia	Hydro-economic modelling of cost-effective transboundary water quality management in the Baltic Sea
Livestock reductions	101222		Russia	Hydro-economic modelling of cost-effective transboundary water quality management in the Baltic Sea
Livestock reductions	31458		Estonia	Hydro-economic modelling of cost-effective transboundary water quality management in the Baltic Sea
Livestock reductions	48792		Estonia	Hydro-economic modelling of cost-effective transboundary water quality management in the Baltic Sea
Livestock reductions	29532		Latvia	Hydro-economic modelling of cost-effective transboundary water quality management in the Baltic Sea
Livestock reductions	55533		Latvia	Hydro-economic modelling of cost-effective transboundary water quality management in the Baltic Sea
Livestock reductions	56817		Lithuania	Hydro-economic modelling of cost-effective transboundary water quality management in the Baltic Sea
Livestock reductions	109354		Lithuania	Hydro-economic modelling of cost-effective transboundary water quality management in the Baltic Sea
Livestock reductions	109782		Poland	Hydro-economic modelling of cost-effective transboundary water quality management in the Baltic Sea
Livestock reductions	244602		Poland	Hydro-economic modelling of cost-effective transboundary water quality management in the Baltic Sea
Livestock reductions	51574		Denmark	Hydro-economic modelling of cost-effective transboundary water quality management in the Baltic Sea
Livestock reductions	106572		Denmark	Hydro-economic modelling of cost-effective transboundary water quality management in the Baltic Sea
Livestock reductions	106358		Germany	Hydro-economic modelling of cost-effective transboundary water quality management in the Baltic Sea
Livestock reductions	159644		Germany	Hydro-economic modelling of cost-effective transboundary water quality management in the Baltic Sea
Livestock reductions	90736		Baltic littoral countries	Hydro-economic modelling of cost-effective transboundary water quality management in the Baltic Sea
Livestock reductions	206831		Baltic littoral countries	Hydro-economic modelling of cost-effective transboundary water quality management in the Baltic Sea
Livestock reductions		2.01813e+06	Sweden	Hydro-economic modelling of cost-effective transboundary water quality management in the Baltic Sea
Livestock reductions		1571188	Sweden	Hydro-economic modelling of cost-effective transboundary water quality management in the Baltic Sea
Livestock reductions		2446127	Finland	Hydro-economic modelling of cost-effective transboundary water quality management in the Baltic Sea
Livestock reductions		757025	Finland	Hydro-economic modelling of cost-effective transboundary water quality management in the Baltic Sea
Livestock reductions		1624367	Russia	Hydro-economic modelling of cost-effective transboundary water quality management in the Baltic Sea
Livestock reductions		1683859	Russia	Hydro-economic modelling of cost-effective transboundary water quality management in the Baltic Sea
Livestock reductions		945024	Estonia	Hydro-economic modelling of cost-effective transboundary water quality management in the Baltic Sea
Livestock reductions		727814	Estonia	Hydro-economic modelling of cost-effective transboundary water quality management in the Baltic Sea
Livestock reductions		890133	Latvia	Hydro-economic modelling of cost-effective transboundary water quality management in the Baltic Sea
Livestock reductions		835777	Latvia	Hydro-economic modelling of cost-effective transboundary water quality management in the Baltic Sea
Livestock reductions		1926428	Lithuania	Hydro-economic modelling of cost-effective transboundary water quality management in the Baltic Sea
Livestock reductions		1907489	Lithuania	Hydro-economic modelling of cost-effective transboundary water quality management in the Baltic Sea
Livestock reductions		4704362	Poland	Hydro-economic modelling of cost-effective transboundary water quality management in the Baltic Sea
Livestock reductions		4501383	Poland	Hydro-economic modelling of cost-effective transboundary water quality management in the Baltic Sea
Livestock reductions		946629	Denmark	Hydro-economic modelling of cost-effective transboundary water quality management in the Baltic Sea
Livestock reductions		1000771	Denmark	Hydro-economic modelling of cost-effective transboundary water quality management in the Baltic Sea
Livestock reductions		2875518	Germany	Hydro-economic modelling of cost-effective transboundary water quality management in the Baltic Sea
Livestock reductions		2149844	Germany	Hydro-economic modelling of cost-effective transboundary water quality management in the Baltic Sea
Livestock reductions		2887502	Baltic littoral countries	Hydro-economic modelling of cost-effective transboundary water quality management in the Baltic Sea
Livestock reductions		3394789	Baltic littoral countries	Hydro-economic modelling of cost-effective transboundary water quality management in the Baltic Sea
Construct and restore wetlands	18725		Sweden	Hydro-economic modelling of cost-effective transboundary water quality management in the Baltic Sea
Construct and restore wetlands	3852		Finland	Hydro-economic modelling of cost-effective transboundary water quality management in the Baltic Sea
Construct and restore wetlands	2996		Russia	Hydro-economic modelling of cost-effective transboundary water quality management in the Baltic Sea
Construct and restore wetlands	6206		Estonia	Hydro-economic modelling of cost-effective transboundary water quality management in the Baltic Sea
Construct and restore wetlands	1712		Latvia	Hydro-economic modelling of cost-effective transboundary water quality management in the Baltic Sea
Construct and restore wetlands	98975		Lithuania	Hydro-economic modelling of cost-effective transboundary water quality management in the Baltic Sea
Construct and restore wetlands	7597		Poland	Hydro-economic modelling of cost-effective transboundary water quality management in the Baltic Sea
Construct and restore wetlands	18725		Denmark	Hydro-economic modelling of cost-effective transboundary water quality management in the Baltic Sea
Construct and restore wetlands	9844		Germany	Hydro-economic modelling of cost-effective transboundary water quality management in the Baltic Sea
Construct and restore wetlands	7597		Baltic littoral countries	Hydro-economic modelling of cost-effective transboundary water quality management in the Baltic Sea
Construct and restore wetlands		795866	Sweden	Hydro-economic modelling of cost-effective transboundary water quality management in the Baltic Sea
Construct and restore wetlands		710801	Finland	Hydro-economic modelling of cost-effective transboundary water quality management in the Baltic Sea
Construct and restore wetlands		423292	Russia	Hydro-economic modelling of cost-effective transboundary water quality management in the Baltic Sea
Construct and restore wetlands		667359	Estonia	Hydro-economic modelling of cost-effective transboundary water quality management in the Baltic Sea
Construct and restore wetlands		439128	Latvia	Hydro-economic modelling of cost-effective transboundary water quality management in the Baltic Sea
Construct and restore wetlands		587644	Lithuania	Hydro-economic modelling of cost-effective transboundary water quality management in the Baltic Sea
Construct and restore wetlands		1280469	Poland	Hydro-economic modelling of cost-effective transboundary water quality management in the Baltic Sea
Construct and restore wetlands		1160308	Denmark	Hydro-economic modelling of cost-effective transboundary water quality management in the Baltic Sea
Construct and restore wetlands		1558455	Germany	Hydro-economic modelling of cost-effective transboundary water quality management in the Baltic Sea
Construct and restore wetlands		933040	Baltic littoral countries	Hydro-economic modelling of cost-effective transboundary water quality management in the Baltic Sea
Multiple abatement measures	36380		Finland	Hydro-economic modelling of cost-effective transboundary water quality management in the Baltic Sea
Multiple abatement measures	29532		Russia	Hydro-economic modelling of cost-effective transboundary water quality management in the Baltic Sea
Multiple abatement measures	20865		Estonia	Hydro-economic modelling of cost-effective transboundary water quality management in the Baltic Sea
Multiple abatement measures	22684		Latvia	Hydro-economic modelling of cost-effective transboundary water quality management in the Baltic Sea
Multiple abatement measures	14231		Lithuania	Hydro-economic modelling of cost-effective transboundary water quality management in the Baltic Sea
Multiple abatement measures	46973		Poland	Hydro-economic modelling of cost-effective transboundary water quality management in the Baltic Sea
Multiple abatement measures	24503		Denmark	Hydro-economic modelling of cost-effective transboundary water quality management in the Baltic Sea
Multiple abatement measures	99403		Germany	Hydro-economic modelling of cost-effective transboundary water quality management in the Baltic Sea
Multiple abatement measures	23968		Baltic littoral countries	Hydro-economic modelling of cost-effective transboundary water quality management in the Baltic Sea
Multiple abatement measures	25894		Baltic littoral countries	Hydro-economic modelling of cost-effective transboundary water quality management in the Baltic Sea
Multiple abatement measures		501188	Sweden	Hydro-economic modelling of cost-effective transboundary water quality management in the Baltic Sea
Multiple abatement measures		636008	Finland	Hydro-economic modelling of cost-effective transboundary water quality management in the Baltic Sea
Multiple abatement measures		300670	Russia	Hydro-economic modelling of cost-effective transboundary water quality management in the Baltic Sea
Multiple abatement measures		412378	Estonia	Hydro-economic modelling of cost-effective transboundary water quality management in the Baltic Sea
Multiple abatement measures		153545	Latvia	Hydro-economic modelling of cost-effective transboundary water quality management in the Baltic Sea
Multiple abatement measures		294464	Lithuania	Hydro-economic modelling of cost-effective transboundary water quality management in the Baltic Sea
Multiple abatement measures		378245	Poland	Hydro-economic modelling of cost-effective transboundary water quality management in the Baltic Sea
Multiple abatement measures		19326340	Denmark	Hydro-economic modelling of cost-effective transboundary water quality management in the Baltic Sea
Multiple abatement measures		1292667	Germany	Hydro-economic modelling of cost-effective transboundary water quality management in the Baltic Sea
Multiple abatement measures		375142	Baltic littoral countries	Hydro-economic modelling of cost-effective transboundary water quality management in the Baltic Sea
Multiple abatement measures	117.7		the Baltic Sea	Increasing the cost-effectiveness of nutrient reduction targets using different spatial scales
Multiple abatement measures	288.9		the Baltic Sea	Increasing the cost-effectiveness of nutrient reduction targets using different spatial scales
Multiple abatement measures	545.7		the Baltic Sea	Increasing the cost-effectiveness of nutrient reduction targets using different spatial scales
Multiple abatement measures	888.1		the Baltic Sea	Increasing the cost-effectiveness of nutrient reduction targets using different spatial scales
Multiple abatement measures	1305.4		the Baltic Sea	Increasing the cost-effectiveness of nutrient reduction targets using different spatial scales
Multiple abatement measures	1829.7		the Baltic Sea	Increasing the cost-effectiveness of nutrient reduction targets using different spatial scales
Multiple abatement measures	2482.4		the Baltic Sea	Increasing the cost-effectiveness of nutrient reduction targets using different spatial scales
Multiple abatement measures	3327.7		the Baltic Sea	Increasing the cost-effectiveness of nutrient reduction targets using different spatial scales
Multiple abatement measures	4301.4		the Baltic Sea	Increasing the cost-effectiveness of nutrient reduction targets using different spatial scales
Multiple abatement measures	5499.8		the Baltic Sea	Increasing the cost-effectiveness of nutrient reduction targets using different spatial scales
Wastewater treatment	9129.2	91336.1	Taihu	Identifying external nutrient reduction requirements and potential in the hypereutrophic Lake Taihu Basin, China
Wastewater treatment	438.4	13153.3	Taihu	Identifying external nutrient reduction requirements and potential in the hypereutrophic Lake Taihu Basin, China
Wastewater treatment	6588.5	43923.6	Taihu	Identifying external nutrient reduction requirements and potential in the hypereutrophic Lake Taihu Basin, China
Wastewater treatment	6588.5	43923.6	Taihu	Identifying external nutrient reduction requirements and potential in the hypereutrophic Lake Taihu Basin, China
Wastewater treatment	4508.5	28178.3	Taihu	Identifying external nutrient reduction requirements and potential in the hypereutrophic Lake Taihu Basin, China
Livestock reductions	1762	13448.5	Taihu	Identifying external nutrient reduction requirements and potential in the hypereutrophic Lake Taihu Basin, China
4R stewardship or tillage	1255.6	7666.7	Taihu	Identifying external nutrient reduction requirements and potential in the hypereutrophic Lake Taihu Basin, China
Construct buffer zone	222.4	1788.2	Taihu	Identifying external nutrient reduction requirements and potential in the hypereutrophic Lake Taihu Basin, China
Construct and restore wetlands	3030.3	43269	Taihu	Identifying external nutrient reduction requirements and potential in the hypereutrophic Lake Taihu Basin, China
Multiple abatement measures	5219.1	38837.7	Taihu	Identifying external nutrient reduction requirements and potential in the hypereutrophic Lake Taihu Basin, China
