# Supplementary material for: Improved estimation of lake greenhouse gas emissions in China based on nutrients and potential benefits from eutrophication controls
Source: Research Square preprint supplement (doi:10.21203/rs.3.rs-4318310/v1), 2024-05-06
Supplement: Supplementary file 2 [file 09d9caeb24f87442be23489d.xlsx]

## Sheet: Sheet1
Lake region	Lake name	Longitude	Latitude	Air temperature(℃)	Surface area(km2)	Mean depth(m)	TN(mg·L-1)	TP(mg·L-1)	Chl-a(μg·L-1)	CO2 emission rate (mg·m-2·day-1)	CH4 diffusion emission rate (mg·m-2·day-1)	CH4 total emission rate (mg·m-2·day-1)	N2O emission rate (mg·m-2·day-1)	Sampling period	Sampling zone	Method	References
Northeast Lake Region	Baitoushantianchi	128.05	42	-4.8	9.8	204				4166.96				2000s	Pelagic zone	Diffusion modeling	Wang and Du, 1998
Northeast Lake Region	Baizijin	123.8	44.9333						298.39	276.816	3.504			Apr. 2014	Pelagic	Headspace equilibrium method	Siyue Li et al. , 2018
Northeast Lake Region	Balipao	125.217	46.4				5.716	0.622	2.046	9184.32	7.608			Apr. 2014	Pelagic	Headspace equilibrium method	Siyue Li et al., 2018
Northeast Lake Region	Beihu	125.367	43.9667		1.9		0.094	0.459	15.451	263.76	4.56			Jul.Nov. 2013	Pelagic	Headspace equilibrium method	Siyue Li et al., 2018
Northeast Lake Region	Beitagongyuanhu	123.433	44.8167				0.958	0.045	12.399	785.52	25.104			Aug. 2013	Pelagic	Headspace equilibrium method	Siyue Li et al., 2018
Northeast Lake Region	Cha'ergan	124.3	45.25	5.1	375.2	2.7	0.806	0.089	9.941	545.76	1.536			Jun. 2013, Apr. 2014	Pelagic	Headspace equilibrium method	Siyue Li et al., 2018
Northeast Lake Region	Chaganpao	124.25	45.25	5.1	347	1.56				-280.38				2000s	Pelagic zone	Diffusion modeling	Wang and Du, 1998
Northeast Lake Region	Changchun institute lake	125	44				0.279	0.105	12.599	132.24	8.52			Jul. 2013-Nov. 2014	Pelagic	Headspace equilibrium method	Siyue Li et al., 2018
Northeast Lake Region	Changchungongyuan	125.267	43.8833				8.666	6.225	48.335	7275.84	139.224			Jul. 2013-Aug. 2014	Pelagic	Headspace equilibrium method	Siyue Li et al., 2018
Northeast Lake Region	Chaoyanggongyuanhu	125.283	43.8667				0.452	1.18	27.038	594.72	10.176			Jul. 2013-Aug. 2014	Pelagic	Headspace equilibrium method	Siyue Li et al., 2018
Northeast Lake Region	Dabusu	125.717	44.8		37.72		0.541	0.12	0.001	21213.8	0.672			Aug. 2013	Pelagic	Headspace equilibrium method	Siyue Li et al., 2018
Northeast Lake Region	Dachengpao	125.267	43.9333				13.674	5.255	28.173	15301.4	785.52			Jul. & Oct. 2013	Pelagic	Headspace equilibrium method	Siyue Li et al., 2018
Northeast Lake Region	Zhalonghu	124.2	47.1667	3.6	127	1	0.88	0.04	5.5			174.96		2008-2009	Littoral	Floating static chambers with Licor	Huang, 2010
Northeast Lake Region	Dakulipao	124.489	45.381	5	15.63	1	2.444	0.125	39.273	720.24	1.584			Jul. 2013	Pelagic	Headspace equilibrium method	Siyue Li et al., 2018
Northeast Lake Region	Dasuipao						5.231	4.591	32.664	4390.56	58.296			Jun. Oct. Nov.2013	Pelagic	Headspace equilibrium method	Siyue Li et al., 2018
Northeast Lake Region	Didazuicunpao	128.517	43.6167		0.14	4.6	1.5	0.138	7.225	2238.24	4.2			Jul. 2013	Pelagic	Headspace equilibrium method	Siyue Li et al., 2018
Northeast Lake Region	Dingxianghu	123.317	44.85				1.38	0.082	22.632	536.64	4.944			Aug. 2013	Pelagic	Headspace equilibrium method	Siyue Li et al., 2018
Northeast Lake Region	Dongdahai	124.633	46.0833		16.5		2.733	4.862	11.363	357.12	0.168			Apr. 2014	Pelagic	Headspace equilibrium method	Siyue Li et al., 2018
Northeast Lake Region	Dongjiapao	125.067	46.5				3.85	0.107	43.833	2209.92	4.992			Jul. 2013	Pelagic	Headspace equilibrium method	Siyue Li et al., 2018
Northeast Lake Region	Dongzijin	124.233	45.0167	5.2	9.02	3.9			13.572	805.056	0.408			Apr. 2014	Pelagic	Headspace equilibrium method	Siyue Li et al., 2018
Northeast Lake Region	Guandipao	128.417	43.55				1.96	0.127	12.399	3742.56	5.64			Jul. 2013	Pelagic	Headspace equilibrium method	Siyue Li et al., 2018
Northeast Lake Region	Guanlanhu	125.273	43.8214				2.298	0.85	52.893	2253.12	21.36			Jul-Nov. 2013	Pelagic	Headspace equilibrium method	Siyue Li et al., 2018
Northeast Lake Region	Haerbinqunlihu						9.711	1.03	27.027	10169.3	38.76			Oct. 2013, 2014	Pelagic	Headspace equilibrium method	Siyue Li et al., 2018
Northeast Lake Region	Halahai	125.733	46.65							8089.92	87.648			Apr. 2014	Pelagic	Headspace equilibrium method	Siyue Li et al., 2018
Northeast Lake Region	Hongqipao	125.217	46.6167	3.4	26.2	1	0.818	0.087	7.13	1064.88	4.44			Apr. 2014	Pelagic	Headspace equilibrium method	Siyue Li et al., 2018
Northeast Lake Region	Huaaopao	123.85	44.9681	5.3	13.2	2.5	3.53623	2.3212	13.418	1116.6	0.336			Apr. 2014	Pelagic	Headspace equilibrium method	Siyue Li et al., 2018
Northeast Lake Region	Huoshaoheipao	124.267	46.55		73.4		0.866	0.138	4.501	1587.36	2.736			Apr.-Jun. 2014	Pelagic	Headspace equilibrium method	Siyue Li et al., 2018
Northeast Lake Region	jingbohu	128.992	43.9118	3.7	91.5	13	0.94	0.46	8.32	2532.97				2000s	Pelagic zone	Diffusion modeling	Wang and Du, 1998
Northeast Lake Region	Jingbohu	129	44.0167	3.7	80	13	0.398	0.0587	1.033	-119.76	0.288			Jul. 2013	Pelagic	Headspace equilibrium method	Siyue Li et al., 2018
Northeast Lake Region	Kalunhu	125.558	43.9672		5		1.623	0.12	72.469	1683.36	2.88			Aug. Nov. 2013, Oct. 2014	Pelagic	Headspace equilibrium method	Siyue Li et al., 2018
Northeast Lake Region	Keqinghu	124.3	47.3	3.4	27	1.5	2.889	0.148	8.059	3336.72	2.4			Jun. 2013-Jan. 2015	Pelagic	Headspace equilibrium method	Siyue Li et al., 2018
Northeast Lake Region	Kulipao	124.483	45.3667	5	16	1	0.805	0.081	5.854	543.6	0.912			Apr. 2014	Pelagic	Headspace equilibrium method	Siyue Li et al., 2018
Northeast Lake Region	Lake A	125.3	43.95				16.569	1.0133	143.075	16085.3	1046.59			Apr. 2013-Aug. 2014	Pelagic	Headspace equilibrium method	Siyue Li et al., 2018
Northeast Lake Region	Lake B	125.317	43.9667				14.047	0.9356	87.006	12052.8	349.776			Jul. -Nov. 2013	Pelagic	Headspace equilibrium method	Siyue Li et al., 2018
Northeast Lake Region	Lake C	125.4	43.9667				6.964	1.691	13.198	814.56	32.688			Jul.-Oct. 2013	Pelagic	Headspace equilibrium method	Siyue Li et al., 2018
Northeast Lake Region	Lamasipao	124.133	46.2667	4.5	51	4.2	4.443	0.149	15.554	6778.32	63.672			Jul. 2013	Pelagic	Headspace equilibrium method	Siyue Li et al., 2018
Northeast Lake Region	Laodonggongyuanhu						0.783	0.167	64.337	4753.97	11.616			Jul. 2013	Pelagic	Headspace equilibrium method	Siyue Li et al., 2018
Northeast Lake Region	Laozhupao	125.05	46.45	3.7	6.24	1.8				12685.2	10.152			Apr. 2014	Pelagic	Headspace equilibrium method	Siyue Li et al., 2018
Northeast Lake Region	Lianghuangpao	124.117	46.6667		556	2.1		0.134		-505.704				2000s	Pelagic zone	Diffusion modeling	Wang and Du, 1998
Northeast Lake Region	Longhupao	124.333	46.75	4	64.8	6.9	0.78	0.253	5.28	632.88	0.528			Apr. 2014	Pelagic	Headspace equilibrium method	Siyue Li et al., 2018
Northeast Lake Region	Maoxingpao	124.45	45.5667	4.8	23	2.5	1.23	0.4		5991.71				2000s	Pelagic zone	Diffusion modeling	Wang and Du, 1998
Northeast Lake Region	Nanhu	125.317	43.85		0.8		0.725	0.554	40.348	330.72	2.376			Jul.-Oct. 2013, Apr. 2014	Pelagic	Headspace equilibrium method	Siyue Li et al., 2018
Northeast Lake Region	Nashidaipao	124.2	46.6333	4.1	429.94	5.2	1.315	0.108	3.007	3186.24	3			Apr. 2014	Pelagic	Headspace equilibrium method	Siyue Li et al., 2018
Northeast Lake Region	Qingkenpao	125.517	46.3667	3.4	33.1	3.8	6.903	0.694	25.231	6712.8	16.512			Jul. 2013	Pelagic	Headspace equilibrium method	Siyue Li et al., 2018
Northeast Lake Region	Shengligongyuanhu						1.372	2.252	65.574	1744.56	8.4			Jul. 2013	Pelagic	Headspace equilibrium method	Siyue Li et al., 2018
Northeast Lake Region	Shengyangqingniangongyuan						7.793	0.38	28.349	9833.5	70.008			Aug. 2013	Pelagic	Headspace equilibrium method	Siyue Li et al., 2018
Northeast Lake Region	Shenyangdonglinggongyuan						0.508	0.047	9.206	1703.35	17.568			Aug. 2013	Pelagic	Headspace equilibrium method	Siyue Li et al., 2018
Northeast Lake Region	Shenyangnanhugongyuan						7.943	0.324	99.309	19656.6	5.712			Aug. 2013	Pelagic	Headspace equilibrium method	Siyue Li et al., 2018
Northeast Lake Region	Sipingnanhu	124.5	43.15		2.05	5.6				3732.72	5.16			Apr. 2014	Pelagic	Headspace equilibrium method	Siyue Li et al., 2018
Northeast Lake Region	Talahongpao	123.933	45.6333	5	71.6	2.3	1.163	0.113	12.446	576.48	0.192			Apr. 2014	Pelagic	Headspace equilibrium method	Siyue Li et al., 2018
Northeast Lake Region	Talahongpao	124.167	46.8	4.1	71.6	2.3	0.859	0.095	2.251	3750.72	66.48			Apr. 2014	Pelagic	Headspace equilibrium method	Siyue Li et al., 2018
Northeast Lake Region	Tianhu	124.45	43.05							5682.53	11.4			Apr. 2014	Pelagic	Headspace equilibrium method	Siyue Li et al., 2018
Northeast Lake Region	Tianjiagongyuanhu	124.9	44.9				11.258	1.2254	31.971	5493.12	63.696			Jul. 2013-Oct. 2014	Pelagic	Headspace equilibrium method	Siyue Li et al., 2018
Northeast Lake Region	Wolong	123.333	42.75		64		3.193	0.174	93.57	5541.55	2.688			Nov. 2013	Pelagic	Headspace equilibrium method	Siyue Li et al., 2018
Northeast Lake Region	Wudalianchi	126.167	48.7167		16.4		1.78	0.44		506.743				2000s	Pelagic zone	Diffusion modeling	Wang and Du, 1998
Northeast Lake Region	Xiannvhu						2.898	0.068	11.214	7193.02	6.624			Aug. 2013	Pelagic	Headspace equilibrium method	Siyue Li et al., 2018
Northeast Lake Region	Xiaopaozi	128.583	43.6833				1.653	0.132	5.785	1861.44	2.016			Jul. 2013	Pelagic	Headspace equilibrium method	Siyue Li et al., 2018
Northeast Lake Region	Xiaoxingkai	132.383	45.3586	4.1	136	1.7				771.513				2000s	Pelagic zone	Diffusion modeling	Wang and Du, 1998
Northeast Lake Region	Xiaoxingkaihu	132.383	45.3586	4.1	176	2.6	1.934	0.112	7.22	2874	3.864			Sep. & Oct. 2013	Pelagic	Headspace equilibrium method	Siyue Li et al., 2018
Northeast Lake Region	Xidahai	124.617	46	4.4	12.5	1	3.16	3.102	14.595	721.44	0.384			Apr. 2014	Pelagic	Headspace equilibrium method	Siyue Li et al., 2018
Northeast Lake Region	Xihulupao	124.217	46.6833		89.3		0.834	0.05	13.859	812.64	3.696			Nov. 2013, Apr. 2014	Pelagic	Headspace equilibrium method	Siyue Li et al., 2018
Northeast Lake Region	Xindianpao	124.233	45.3333		28		1.3	0.071	8.705	6302.4	0.96			Jun. 2013, Apr. 2014	Pelagic	Headspace equilibrium method	Siyue Li et al., 2018
Northeast Lake Region	Xindiaopao	124.233	45.3333		28		2.403	0.102	50.289	236.16	2.76			Jul. 2013	Pelagic	Headspace equilibrium method	Siyue Li et al., 2018
Northeast Lake Region	Xingkaihu	132.668	45.3	4.1	1057.02	4.6	1.53	0.21		1818.27				2000s	Pelagic zone	Diffusion modeling	Wang and Du, 1998
Northeast Lake Region	Xinhuapao	123.75	45.6333	5	74	2.8	0.973	0.111	8.191	1721.76	5.04			Apr. 2014	Pelagic	Headspace equilibrium method	Siyue Li et al., 2018
Northeast Lake Region	xinmiaopao	124.5	45.1833	5.1	31	2				-388.286				2000s	Pelagic zone	Diffusion modeling	Wang and Du, 1998
Northeast Lake Region	Xinmiaopao	124.482	45.2039	5.1	31.6	2	2.138	0.096	45.88	1090.8	3.984			Jul. 2013	Pelagic	Headspace equilibrium method	Siyue Li et al., 2018
Northeast Lake Region	Yanminghu	125.267	43.9333				2.481	0.846	50.171	3456.96	8.544			Jul. 2013-Nov. 2013	Pelagic	Headspace equilibrium method	Siyue Li et al., 2018
Northeast Lake Region	Youyigongyuanhu	125.317	43.8167				1.865	0.655	34.06	1154.64	4.752			Jul-Nov. 2013	Pelagic	Headspace equilibrium method	Siyue Li et al., 2018
Northeast Lake Region	Yuebingpao	124.398	46.458	4.1	13.67	2.1	2.399	0.138	9.367	2236.56	1.32			Sep. & Oct. 2013	Pelagic	Headspace equilibrium method	Siyue Li et al., 2018
Northeast Lake Region	yueliangpao	123.867	45.7167	5	206	2.3	0.12	0.04		182.293				2000s	Pelagic zone	Diffusion modeling	Wang and Du, 1998
Northeast Lake Region	Yueliangpao	124	45.7333	5	206.1	2.3	0.622	1.498	16.565	1139.52	0.984			Aug. 2013, Apr. 2014	Pelagic	Headspace equilibrium method	Siyue Li et al., 2018
Northeast Lake Region	Yuzipao	124.083	45.0833				3.692	3.478	12.791	294.72	11.04			Sep. 2103 & Aug. 2014	Pelagic	Headspace equilibrium method	Siyue Li et al., 2018
Northeast Lake Region	Zhalonghu	124.24	47.2104		7	1	1.29	0.014		1250.59				2000s	Pelagic zone	Diffusion modeling	Wang and Du, 1998
Northeast Lake Region	Zhalonghu	124.2	47.1667	3.6	127	1	0.88	0.04	3.5	1101.84		114.72		2008-2009	Pelagic	Floating static chambers with Licor	Huang, 2010
Northeast Lake Region	Zhongneipao	125.217	46.0667		13.6		6.5	1.1	242.94	353.76	2.16			Apr. 2014	Pelagic	Headspace equilibrium method	Siyue Li et al., 2018
East Lake Region	Lake Taihu-1-Northwest Zone and Meiliang Bay-open water	120.235	31.24	15.8	2400	1.9	3.42	0.14	30.03	836				2000-2015(monthly)	Pelagic zone	bulk diffusion model	Qitao Xian et al., 2020
East Lake Region	Lake Taihu-1-Northwest Zone and Meiliang Bay-river mouth	120.235	31.24	15.8	2400	1.9	5.41	0.26	35.48	2503.6				2000-2015(monthly)	river mouth	bulk diffusion model	Qitao Xian et al., 2020
East Lake Region	Lake Taihu-2-transition zone-open water	120.235	31.24	15.8	2400	1.9	2.42	0.1	14.86	532.4				2000-2015(monthly)	Pelagic zone	bulk diffusion model	Qitao Xian et al., 2020
East Lake Region	Lake Taihu-2-transition zone-river mouth	120.235	31.24	15.8	2400	1.9	2.43	0.1	15.4	572				2000-2015(monthly)	river mouth	bulk diffusion model	Qitao Xian et al., 2020
East Lake Region	shallow lakes-Mesotrophic (≤50)-Winter						0.9	0.02	6.4				0.343	冬季		floating static chamber	Yiwen Zhou et al., 2021, 2020
East Lake Region	shallow lakes-Eutrophic (50-60)-Winter						0.7	0.09	14.4				0.062	冬季		floating static chamber	Yiwen Zhou et al., 2021, 2020
East Lake Region	shallow lakes-Middle-eutrophic (60-70)-Winter						3.2	0.13	27.4				1.21	冬季		floating static chamber	Yiwen Zhou et al., 2021, 2020
East Lake Region	Lake Taihu A (Spatial+seasonal)	120.145	31.4093	15.8	2329.14	2.2	4.2	0.47	120				1.0138	夏季	Heavy algae-accumulated zone	floating static chamber	Yiwen Zhou et al., 2021, 2020
East Lake Region	Lake Taihu A (Spatial+seasonal)	120.145	31.4093	15.8	2329.14	2.2	3.4	0.13	43.9				1.3862	冬季	Heavy algae-accumulated zone	floating static chamber	Yiwen Zhou et al., 2021, 2020
East Lake Region	Lake Taihu B (Spatial+seasonal)	120.145	31.4093	15.8	2329.14	2.2	4.9	0.48	51.8				3.2897	夏季	Heavy algae-accumulated zone	floating static chamber	Yiwen Zhou et al., 2021, 2020
East Lake Region	Lake Taihu B (Spatial+seasonal)	120.145	31.4093	15.8	2329.14	2.2	3.1	0.14	21.5				1.6138	冬季	Heavy algae-accumulated zone	floating static chamber	Yiwen Zhou et al., 2021, 2020
East Lake Region	Lake Taihu C (Spatial+seasonal)	120.145	31.4093	15.8	2329.14	2.2	3.7	0.13	45.9				0.5256	夏季	transitional zone (lake center)	floating static chamber	Yiwen Zhou et al., 2021, 2020
East Lake Region	Lake Taihu C (Spatial+seasonal)	120.145	31.4093	15.8	2329.14	2.2	2.4	0.21	14.6				0.7656	冬季	transitional zone (lake center)	floating static chamber	Yiwen Zhou et al., 2021, 2020
East Lake Region	Lake Taihu D (Spatial+seasonal)	120.145	31.4093	15.8	2329.14	2.2	0.4	0.13	4.9				0.1032	夏季	light algae-accumulated zone	floating static chamber	Yiwen Zhou et al., 2021, 2020
East Lake Region	Lake Taihu D (Spatial+seasonal)	120.145	31.4093	15.8	2329.14	2.2	0.7	0.03	6.3				0.1118	冬季	light algae-accumulated zone	floating static chamber	Yiwen Zhou et al., 2021, 2020
East Lake Region	Lake Chaohu 1 (Spatial)	117.371	31.6547	16.2	770	4	4.02	0.18	28.4		3.52			2016.6-2017.5		modified headspace-equilibrium method+Diffusion modeling	Lei Zhang et al., 2021
East Lake Region	Lake Chaohu 2 (Spatial)	117.394	31.6858	16.2	770	3.2	4.77	0.22	26.6		9.424			2016.6-2017.5		modified headspace-equilibrium method+Diffusion modeling	Lei Zhang et al., 2021
East Lake Region	Lake Chaohu 3 (Spatial)	117.362	31.6868	16.2	770	3.4	4.51	0.18	28.5		5.424			2016.6-2017.5		modified headspace-equilibrium method+Diffusion modeling	Lei Zhang et al., 2021
East Lake Region	Lake Chaohu 4 (Spatial)	117.335	31.6755	16.2	770	3.4	4.1	0.18	17.1		4.096			2016.6-2017.5		modified headspace-equilibrium method+Diffusion modeling	Lei Zhang et al., 2021
East Lake Region	Lake Chaohu 5 (Spatial)	117.321	31.6604	16.2	770	3.5	3.94	0.16	18.9		6.784			2016.6-2017.5		modified headspace-equilibrium method+Diffusion modeling	Lei Zhang et al., 2021
East Lake Region	Lake Chaohu 6 (Spatial)	117.352	31.6019	16.2	770	3.2	3.49	0.16	18.5		3.168			2016.6-2017.5		modified headspace-equilibrium method+Diffusion modeling	Lei Zhang et al., 2021
East Lake Region	Lake Chaohu 7 (Spatial)	117.381	31.5755	16.2	770	3	3.18	0.17	19.1		4.272			2016.6-2017.5		modified headspace-equilibrium method+Diffusion modeling	Lei Zhang et al., 2021
East Lake Region	Lake Chaohu 8 (Spatial)	117.421	31.6443	16.2	770	3.9	3.54	0.15	20.1		4.224			2016.6-2017.5		modified headspace-equilibrium method+Diffusion modeling	Lei Zhang et al., 2021
East Lake Region	Lake Chaohu 9 (Spatial)	117.524	31.5075	16.2	770	4.4	2.7	0.11	13.3		1.744			2016.6-2017.5		modified headspace-equilibrium method+Diffusion modeling	Lei Zhang et al., 2021
East Lake Region	Lake Chaohu 10 (Spatial)	117.467	31.5642	16.2	770	4	3.2	0.13	15.4		3.744			2016.6-2017.5		modified headspace-equilibrium method+Diffusion modeling	Lei Zhang et al., 2021
East Lake Region	Lake Chaohu 11 (Spatial)	117.54	31.5604	16.2	770	3.9	2.6	0.13	13.7		2.608			2016.6-2017.5		modified headspace-equilibrium method+Diffusion modeling	Lei Zhang et al., 2021
East Lake Region	Lake Chaohu 12 (Spatial)	117.621	31.5226	16.2	770	4.4	2.32	0.1	12.3		1.68			2016.6-2017.5		modified headspace-equilibrium method+Diffusion modeling	Lei Zhang et al., 2021
East Lake Region	Lake Chaohu 13 (Spatial)	117.555	31.4708	16.2	770	3.7	2.53	0.11	11.8		1.808			2016.6-2017.5		modified headspace-equilibrium method+Diffusion modeling	Lei Zhang et al., 2021
East Lake Region	Lake Chaohu 14 (Spatial)	117.685	31.5906	16.2	770	4.2	2.27	0.12	7.8		2.608			2016.6-2017.5		modified headspace-equilibrium method+Diffusion modeling	Lei Zhang et al., 2021
East Lake Region	Lake Chaohu 15 (Spatial)	117.671	31.534	16.2	770	4.2	2.47	0.12	10.6		2.368			2016.6-2017.5		modified headspace-equilibrium method+Diffusion modeling	Lei Zhang et al., 2021
East Lake Region	Lake Chaohu 16 (Spatial)	117.633	31.5774	16.2	770	4.3	2.34	0.13	10.1		2.176			2016.6-2017.5		modified headspace-equilibrium method+Diffusion modeling	Lei Zhang et al., 2021
East Lake Region	Lake Chaohu 17 (Spatial)	117.668	31.634	16.2	770	4.3	2.15	0.1	12.1		2.432			2016.6-2017.5		modified headspace-equilibrium method+Diffusion modeling	Lei Zhang et al., 2021
East Lake Region	Lake Chaohu 18 (Spatial)	117.754	31.6132	16.2	770	3.7	2.35	0.12	8.7		3.04			2016.6-2017.5		modified headspace-equilibrium method+Diffusion modeling	Lei Zhang et al., 2021
East Lake Region	Lake Chaohu 19 (Spatial)	117.836	31.5925	16.2	770	3.9	2.28	0.11	8.8		4.432			2016.6-2017.5		modified headspace-equilibrium method+Diffusion modeling	Lei Zhang et al., 2021
East Lake Region	Lake Chaohu 20 (Spatial)	117.848	31.5915	16.2	770	3.9	2.35	0.13	10		8.032			2016.6-2017.5		modified headspace-equilibrium method+Diffusion modeling	Lei Zhang et al., 2021
East Lake Region	Poyang Lake	116.373	28.9494	17.7	2500	6.8	0.935676	0.0540294	2.87618				0.867	2013.7-2013.8		headspace-equilibrium method	Huaxin Wang et al., 2017
East Lake Region	Lake Taihu (Monthy)	120.24	31.24	15.8	2338.1	1.89	2.542	0.0895	10.3				0.097	2012-2017.2月		headspace-equilibrium method	Yongqiang Zhou et al.,2020
East Lake Region	Lake Taihu (Monthy)	120.24	31.24	15.8	2338.1	1.89	2.777	0.0655	28.1				0.282	2012-2017.5月		headspace-equilibrium method	Yongqiang Zhou et al.,2020
East Lake Region	Lake Taihu (Monthy)	120.24	31.24	15.8	2338.1	1.89	1.3525	0.04475	45.9				1.245	2012-2017.8月		headspace-equilibrium method	Yongqiang Zhou et al.,2020
East Lake Region	Lake Taihu (Monthy)	120.24	31.24	15.8	2338.1	1.89	0.9805	0.0455	27.7				0.132	2012-2017.11月		headspace-equilibrium method	Yongqiang Zhou et al.,2020
East Lake Region	Poyang Lake	116.373	28.9494	17.7	2500	6.8	1.11	0.11	9.04			8.6616					Liu et al. 2017
East Lake Region	Lake Taihu-3-aquatic vegetation zone	120.235	31.24	15.8	2400	1.9	1.45	0.05	7.5	624.8				2000-2015(seasonal )	All	bulk diffusion model	Qitao Xian et al., 2020
East Lake Region	Aixihu	116.417	28.85							1502.4				Apr.2011	Pelagic zone	Diffusion modeling	Lai et al., 2012
East Lake Region	Aixihu	116.417	28.85							-124.8				Apr.2011	Pelagic zone	Diffusion modeling	Lai et al., 2012
East Lake Region	Aixihu	116.417	28.85							177.6				Oct. 2011	Pelagic zone	Diffusion modeling	Lai et al., 2012
East Lake Region	Aixihu	116.417	28.85							-218.4				Oct. 2011	Pelagic zone	Diffusion modeling	Lai et al., 2012
East Lake Region	Lake Taihu-Meiliang Bay	120.17	31.47	15.8	2338	1.9	2.0175	0.06	2.66			48.11		2019.3-2019.11		floating static chambers	Jing Wang et al. , 2022
East Lake Region	Lake Taihu-black bloom prone areas	120.145	31.4093	15.8	2338	2.1	4.06	0.228	16.34		0.592			2017.1-2017.12	littoral zone	headspace-equilibrium method	Lei Zhang et al., 2021
East Lake Region	Lake Taihu-open area	120.145	31.4093	15.8	2338	2.1	3.78	0.209	17.07		10.099			2017.1-2017.12	Pelagic zone	headspace-equilibrium method	Lei Zhang et al., 2021
East Lake Region	Baidang Lake	117.381	30.8097	16.7	57.8	3.1	0.5	0.17	8.5	-73.752		2.448		2018.8-2018.9		floating static chamber	Yiwen Zhou et al., 2020
East Lake Region	Baiyunhu	113.248	23.2358		17.4	2	0.703	0.014	1.13	-345.096				Apr. 2008	Pelagic zone	Diffusion modeling	Sun et al., 2010
East Lake Region	Baiyunhu	113.248	23.2358		17.4	2	0.623	0.022	10.033	-352.608				Aug. 2008	Pelagic zone	Diffusion modeling	Sun et al., 2010
East Lake Region	Baiyunhu	113.248	23.2358		17.4	2	0.795	0.02	10.95	243.156				Oct. 2008	Pelagic zone	Diffusion modeling	Sun et al., 2010
East Lake Region	Baiyunhu	113.248	23.2358		17.4	2	1.314	0.019	1.92	-56.6016				Dec. 2008	Pelagic zone	Diffusion modeling	Sun et al., 2010
East Lake Region	Baoan	114.73	30.2381	17.2	3.6	2.6	0.92	0.09	7.06	484	22.07			2003-2004	Pelagic zone	CH4 and CO2 flux by modeling	Xing, 2007
East Lake Region	Biandantang	114.717	30.1833	17.2	3.33	1.9	1.4	0.03	5.21	1068.48		21.072		Apr. 2003 to Mar. 2004	Pelagic zone	Floating static chambers with GC	Xing, 2004; Xing et al., 2006
East Lake Region	Biandantang	114.717	30.1833		3.33					691.44		4.728		Spring (2003-2004)	Pelagic zone	Floating static chambers with GC	Xing, 2004
East Lake Region	Biandantang	114.717	30.1833		3.33					-761.28		43.104		Summer (2003-2004)	Pelagic zone	Floating static chambers with GC	Xing, 2004
East Lake Region	Biandantang	114.717	30.1833		3.33					-744.24		18.504		Autumn (2003-2004)	Pelagic zone	Floating static chambers with GC	Xing, 2004
East Lake Region	Biandantang	114.717	30.1833		3.33					5089.92		17.952		Winter (2003-2004)	Pelagic zone	Floating static chambers with GC	Xing, 2004
East Lake Region	Caizi Lake	117.12	30.8166	16.7	71.47	3	0.8	0.04	7.8	196.872		2.448		2018.8-2018.9		floating static chamber	Yiwen Zhou et al., 2020
East Lake Region	Cehu Lake	117.12	30.8166	16.7	71.47	2	1.4	0.43	22.7	-388.056		26.856		2018.8-2018.9		floating static chamber	Yiwen Zhou et al., 2020
East Lake Region	Chaohu	117.5	31.5667	16.2	770					-372.557		0.525312	-0.0722304		Pelagic zone	Floating static chambers with GC	Liu et al., 2013
East Lake Region	Chaohu	117.379	31.5559	16.2	770	2.8	2.8	0.18	18.9	-105.16	8.86001			2003-2004	Pelagic zone	CH4 and CO2 flux by modeling	Xing, 2007
East Lake Region	Chaohu Lake	117.379	31.5559	16.2	786.91	2.9	3.3	0.31	113.9	8452.8		8446.56		2018.8-2018.9		floating static chamber	Yiwen Zhou et al., 2020
East Lake Region	Daotunwahu	116.25	36.1667		24.7		2.948	0.084	16.14	418.91				Apr. 2008	Pelagic zone	Diffusion modeling	Sun et al., 2010
East Lake Region	Daotunwahu	116.25	36.1667		24.7		2.214	0.114	54.747	1690.33				Aug. 2008	Pelagic zone	Diffusion modeling	Sun et al., 2010
East Lake Region	Daotunwahu	116.25	36.1667		24.7		1.954	0.104	39.92	-96.2496				Oct. 2008	Pelagic zone	Diffusion modeling	Sun et al., 2010
East Lake Region	Daotunwahu	116.25	36.1667		24.7		1.429	0.108	7.07	95.513				Dec. 2008	Pelagic zone	Diffusion modeling	Sun et al., 2010
East Lake Region	Datong Lake	112.54	29.2179	17.2	114.2	2.6	1.3	0.46	29.4	661.272		124.464		2018.8-2018.9		floating static chamber	Yiwen Zhou et al., 2020
East Lake Region	Dianshan	120.896	31.1213	15.6	63.7	2.2	1.52	0.25	37.53	-135.52	9.10001			2003-2004	Pelagic zone	CH4 and CO2 flux by modeling	Xing, 2007
East Lake Region	Dianshan Lake	120.896	31.1213	15.6	7.72	2.1	4.3	0.36	102.5	4475.3		349.536		2018.8-2018.9		floating static chamber	Yiwen Zhou et al., 2020
East Lake Region	Donghu Lake	114.394	30.5594	17.3	31.75	2.5	1.1	0.16	44	-458.4		20.736		2018.8-2018.9		floating static chamber	Yiwen Zhou et al., 2020
East Lake Region	Dongpinghu	116.221	35.9401	14	124.3	2.5	2.825	0.044	5.54958	-601.896				Apr. 2008	Pelagic zone	Diffusion modeling	Sun et al., 2010
East Lake Region	Dongpinghu	116.221	35.9401	14	124.3	2.5	3.604	0.03	15.328	305.486				Aug. 2008	Pelagic zone	Diffusion modeling	Sun et al., 2010
East Lake Region	Dongpinghu	116.221	35.9401	14	124.3	2.5	1.457	0.034	35.17	657.398				Oct. 2008	Pelagic zone	Diffusion modeling	Sun et al., 2010
East Lake Region	Dongpinghu	116.221	35.9401	14	124.3	2.5	1	0.035	8.49	913.423				Dec. 2008	Pelagic zone	Diffusion modeling	Sun et al., 2010
East Lake Region	Dongtaihu (Macrophytes)	120.25	31.25	15.8	131	2.2				139.487				Spring (2003-2005)	Pelagic zone	Floating static chambers with GC	Ji et al., 2006
East Lake Region	Dongtaihu (Macrophytes)	120.25	31.25	15.8	131	2.2				3218.88				Summer (2003-2005)	Pelagic zone	Floating static chambers with GC	Ji et al., 2006
East Lake Region	Dongtaihu (Macrophytes)	120.25	31.25	15.8	131	2.2				936.296				Autumn (2003-2005)	Pelagic zone	Floating static chambers with GC	Ji et al., 2006
East Lake Region	Dongtaihu (Macrophytes)	120.25	31.25	15.8	131	2.2				594.328				Winter (2003-2005)	Pelagic zone	Floating static chambers with GC	Ji et al., 2006
East Lake Region	Dongting Lake	112.541	28.8124	17.4	2579.2	5.5	2.3	0.13	55	-191.136		55.824		2018.8-2018.9		floating static chamber	Yiwen Zhou et al., 2020
East Lake Region	Poyang Lake-XJXZ	116.374	28.723	18.1	2398.32	6.8	0.582	0.092	2			13.166		2014.10.	littoral zone	floating static chamber	Haizhen Wang et al., 2021
East Lake Region	Poyang Lake-FHK	116.315	28.73	17.7	2398.32	6.8	1.23	0.075	3.71			99.056		2014.10.	littoral zone	floating static chamber	Haizhen Wang et al., 2021
East Lake Region	Poyang Lake-GJNZ	116.252	28.8519	17.7	2398.32	6.8	0.85	0.064	2.55			7.523		2014.10.	littoral zone	floating static chamber	Haizhen Wang et al., 2021
East Lake Region	Poyang Lake-KS	116.416	28.9704	17.7	2398.32	6.8	0.761	0.07	3.3			25.078		2014.10.	littoral zone	floating static chamber	Haizhen Wang et al., 2021
East Lake Region	Poyang Lake-LK	116.441	29.0226	17.7	2398.32	6.8	0.82	0.061	3.67			10.658		2014.10.	Pelagic zone	floating static chamber	Haizhen Wang et al., 2021
East Lake Region	Poyang Lake-SSHAN	116.374	29.0749	17.7	2398.32	6.8	0.92	0.066	3.97			20.062		2014.10.	Pelagic zone	floating static chamber	Haizhen Wang et al., 2021
East Lake Region	Poyang Lake-GJZZ	115.997	29.1829	17.7	2398.32	6.8	1.03	0.07	3.1			10.658		2014.10.	littoral zone	floating static chamber	Haizhen Wang et al., 2021
East Lake Region	Poyang Lake-XHK	115.923	29.1829	17.7	2398.32	6.8	1.04	0.073	3.13			13.793		2014.10.	littoral zone	floating static chamber	Haizhen Wang et al., 2021
East Lake Region	Poyang Lake-DC	116.217	29.2108	17.7	2398.32	6.8	0.89	0.051	3.38			20.689		2014.10.	Pelagic zone	floating static chamber	Haizhen Wang et al., 2021
East Lake Region	Poyang Lake-ZXK	116.045	29.2979	17.7	2398.32	6.8	1.03	0.072	3.4			57.678		2014.10.	Pelagic zone	floating static chamber	Haizhen Wang et al., 2021
East Lake Region	Poyang Lake-XZ	116.038	29.4338	17.7	2398.32	6.8	0.97	0.074	3.38			46.393		2014.10.	littoral zone	floating static chamber	Haizhen Wang et al., 2021
East Lake Region	Poyang Lake-HK	116.217	29.7509	17.7	2398.32	6.8	0.81	0.064	2.55			6.896		2014.10.	littoral zone	floating static chamber	Haizhen Wang et al., 2021
East Lake Region	Poyang Lake-Spring	116.354	29.0765	17.7	2398.32	6.8	1.12961	0.0493333	2.21902			16.704		2015.3-2015.5		floating static chamber	Haizhen Wang et al., 2021
East Lake Region	Poyang Lake-Summer	116.354	29.0765	17.7	2398.32	6.8	0.998882	0.0508824	2.68392			24.0384		2015.6-2015.8		floating static chamber	Haizhen Wang et al., 2021
East Lake Region	Poyang Lake-Autumn	116.354	29.0765	17.7	2398.32	6.8	1.05231	0.0648039	2.52549			21.7344		2014.10-2014.11&2015.9		floating static chamber	Haizhen Wang et al., 2021
East Lake Region	Poyang Lake-Winter	116.354	29.0765	17.7	2398.32	6.8	1.39071	0.0546078	2.31784			22.7712		2014.12&2015.1-2015.2		floating static chamber	Haizhen Wang et al., 2021
East Lake Region	Poyang Lake-Jan	116.354	29.0765	17.7	2398.32	6.8	1.26341	0.0512353	2.54706			27.234		2015.1.		floating static chamber	Haizhen Wang et al., 2021
East Lake Region	Poyang Lake-Feb	116.354	29.0765	17.7	2398.32	6.8	1.64676	0.0501765	2.32647			12.5277		2015.2.		floating static chamber	Haizhen Wang et al., 2021
East Lake Region	Poyang Lake-Mar	116.354	29.0765	17.7	2398.32	6.8	1.22941	0.0491176	2.27471			31.0468		2015.3.		floating static chamber	Haizhen Wang et al., 2021
East Lake Region	Poyang Lake-Apr	116.354	29.0765	17.7	2398.32	6.8	1.01	0.05	2.01			20.9702		2015.4.		floating static chamber	Haizhen Wang et al., 2021
East Lake Region	Poyang Lake-May	116.354	29.0765	17.7	2398.32	6.8	1.14941	0.0488824	2.37235			16.0681		2015.5.		floating static chamber	Haizhen Wang et al., 2021
East Lake Region	Poyang Lake-Jun	116.354	29.0765	17.7	2398.32	6.8	1.12529	0.0445882	2.29941			22.0596		2015.6.		floating static chamber	Haizhen Wang et al., 2021
East Lake Region	Poyang Lake-Jul	116.354	29.0765	17.7	2398.32	6.8	0.998706	0.0627059	3.09353			9.53192		2015.7.		floating static chamber	Haizhen Wang et al., 2021
East Lake Region	Poyang Lake-Aug	116.354	29.0765	17.7	2398.32	6.8	0.872647	0.0453529	2.65882			18.2468		2015.8.		floating static chamber	Haizhen Wang et al., 2021
East Lake Region	Poyang Lake-Sep	116.354	29.0765	17.7	2398.32	6.8	1.02506	0.0568235	2.17471			14.4341		2015.9.		floating static chamber	Haizhen Wang et al., 2021
East Lake Region	Poyang Lake-Oct	116.354	29.0765	17.7	2398.32	6.8	1.03771	0.0726471	3.10882			5.17448		2014.10.		floating static chamber	Haizhen Wang et al., 2021
East Lake Region	Poyang Lake-Nov	116.354	29.0765	17.7	2398.32	6.8	1.09418	0.0649412	2.29294			52.2893		2014.11.		floating static chamber	Haizhen Wang et al., 2021
East Lake Region	Poyang Lake-Dec	116.354	29.0765	17.7	2398.32	6.8	1.26194	0.0624118	2.08			23.4213		2014.12.		floating static chamber	Haizhen Wang et al., 2021
East Lake Region	Dongxi	114.6	30.6167		1.5	1.7	0.79	0.07	47.66	5636.84	9.19001			2003-2004	Pelagic zone	CH4 and CO2 flux by modeling	Xing, 2007
East Lake Region	Duchang (Lake Poyang)	116.3	29.0833	17.7	2933	6.8	0.9575	0.0536667	2.74667	344.64		6.48	0.04872	2010-2011	Pelagic zone	Floating static chambers with GC	Lin, 2012
East Lake Region	East Dongting	113.033	29.25	17.4	1478.2	6.1	0.79	0.05	6.24	111.76	25.09			2003-2004	Pelagic zone	CH4 and CO2 flux by modeling	Xing, 2007
East Lake Region	East Taihu	120.25	31.25	15.8	2329.14	2.2	1.3525	0.04475	45.9	3201.36			0.312	9:00 Am (Summer)	Pelagic zone	Floating static chambers with GC	Li XH, 2005
East Lake Region	East Taihu	120.25	31.25	15.8	2329.14	2.2	0.9805	0.0455	27.7	1686			0.456	9:00 Am (Autumn)	Pelagic zone	Floating static chambers with GC	Li XH, 2005
East Lake Region	East Taihu Lake	120.5	31.0333	15.8	2329.14	2.2				1677.12		116.688	0.096	Jun. 2004	Pelagic zone	Floating static chambers with GC	Li XH, 2005
East Lake Region	East Taihu Lake	120.5	31.0333	15.8	2329.14	2.2				5881.68		260.952	0.696	Jul. 2004	Pelagic zone	Floating static chambers with GC	Li XH, 2005
East Lake Region	East Taihu Lake	120.5	31.0333	15.8	2329.14	2.2				2045.04		165.648	0.072	Aug. 2004	Pelagic zone	Floating static chambers with GC	Li XH, 2005
East Lake Region	East Taihu Lake	120.5	31.0333	15.8	2329.14	2.2				2288.16		89.712	0.888	Sep. 2004	Pelagic zone	Floating static chambers with GC	Li XH, 2005
East Lake Region	East Taihu Lake	120.5	31.0333	15.8	131	1.2				1098.48		4.008		Oct. 2004	Pelagic zone	Floating static chambers with GC	Li XH, 2005
East Lake Region	East Taihu Lake	120.5	31.0333	15.8	2329.14	2.2				1671.6		8.352	0.456	Nov. 2004	Pelagic zone	Floating static chambers with GC	Li XH, 2005
East Lake Region	East Taihu Lake	120.5	31.0333	15.8	2329.14	2.2				459.12		6.12	0.264	Dec. 2004	Pelagic zone	Floating static chambers with GC	Li XH, 2005
East Lake Region	East Taihu Lake	120.25	31.25	15.8	131	1.2				272.64		13.704		Dirunal (Spring)	Pelagic zone	Floating static chambers with GC	Li XH, 2005
East Lake Region	East Taihu Lake	120.25	31.25	15.8	131	1.2				-58.8				Dirunal (Summer)	Pelagic zone	Floating static chambers with GC	Li XH, 2005
East Lake Region	Gehu	119.8	31.5833	15.6	146.5	1.3	1.22	0.25	41.33	-353.32	5.34			2003-2004	Pelagic zone	CH4 and CO2 flux by modeling	Xing, 2007
East Lake Region	Gehu Lake	119.8	31.5833	15.6	146.5	1.3	2.7	0.33	62.2	309.602		233.016		2018.8-2018.9		floating static chamber	Yiwen Zhou et al., 2020
East Lake Region	Gucheng Lake	118.938	31.2884	16.1	30.74	1.6	1.1	0.14	11.6	614.016		147.36		2018.8-2018.9		floating static chamber	Yiwen Zhou et al., 2020
East Lake Region	Honghu	113.367	29.8	16.9	348.4	1.9	1.69	0.08	20.66	498.08	18.6			2003-2004	Pelagic zone	CH4 and CO2 flux by modeling	Xing, 2007
East Lake Region	Honghu Lake	113.368	29.8661	16.9	215.13	1.3	1.1	0.16	47.3	2478.43		1194.24		2018.8-2018.9		floating static chamber	Yiwen Zhou et al., 2020
East Lake Region	Hongxing	114.967	30.0833		1	2.7	3.39	0.25	57.61	2623.28	12.06			2003-2004	Pelagic zone	CH4 and CO2 flux by modeling	Xing, 2007
East Lake Region	Hongze	118.712	33.3201	15	1577	9.8	1.76028	0.125319	12.4549	-646.272		0.165888	-0.239501		Pelagic zone	Floating static chambers with GC	Liu et al., 2013
East Lake Region	Houguan	114.107	30.4817	17	10.1	2.8	0.99	0.06	12.54	116.16	7.5			2003-2004	Pelagic zone	CH4 and CO2 flux by modeling	Xing, 2007
East Lake Region	Huama	115.055	30.3045		4.7	2.2	1.2	0.06	9.09	187.88	26.49			2003-2004	Pelagic zone	CH4 and CO2 flux by modeling	Xing, 2007
East Lake Region	Huanghu	116.383	30.0333	17.3	118	3.9	0.843	0.086		-472.08				1996-1998	Pelagic zone	Diffusion modeling	Liu and Zhang, 2000
East Lake Region	Huangjiahu	114.29	30.4479	17.3	46.53	4.1	2.195	0.128	35.25	6614.4				Apr.2011	Pelagic zone	Diffusion modeling	Lai et al., 2012
East Lake Region	Huangjiahu	114.29	30.4479	17.3	46.53	4.1	2.195	0.128	35.25	5644.8				Apr.2011	Pelagic zone	Diffusion modeling	Lai et al., 2012
East Lake Region	Huangjiahu	114.29	30.4479	17.3	46.53	4.1	2.08	0.201	38.6	2124				Oct. 2011	Pelagic zone	Diffusion modeling	Lai et al., 2012
East Lake Region	Lake Chaohu-eastern part (seasonal )	117.57	31.56	16.2	770	2.5	2.3	0.0583	91.8				0.1628	2017.2	ALL	headspace equilibrium method+boundary layer method (BLM)	Yuqing Miao et al., 2020
East Lake Region	Lake Chaohu-eastern part (seasonal )	117.57	31.56	16.2	770	2.5	1.5	0.1082	54.5				0.1936	2017.4	ALL	headspace equilibrium method+boundary layer method (BLM)	Yuqing Miao et al., 2020
East Lake Region	Lake Chaohu-eastern part (seasonal )	117.57	31.56	16.2	770	2.5	1.1	0.153	33				0.1496	2017.8	ALL	headspace equilibrium method+boundary layer method (BLM)	Yuqing Miao et al., 2020
East Lake Region	Lake Chaohu-eastern part (seasonal )	117.57	31.56	16.2	770	2.5	1	0.0249	54.5				0.0704	2017.11	ALL	headspace equilibrium method+boundary layer method (BLM)	Yuqing Miao et al., 2020
East Lake Region	Lake Chaohu-eastern part (overall)	117.57	31.56	16.2	770	2.5	1.5	0.0881	49.4				0.1452	2017.2-2017.11	ALL	headspace equilibrium method+boundary layer method (BLM)	Yuqing Miao et al., 2020
East Lake Region	Lake Chaohu-central part (seasonal )	117.57	31.56	16.2	770	2.5	2.8	0.0739	19				0.1628	2017.2	ALL	headspace equilibrium method+boundary layer method (BLM)	Yuqing Miao et al., 2020
East Lake Region	Lake Chaohu-central part (seasonal )	117.57	31.56	16.2	770	2.5	1.4	0.1181	38				0.242	2017.4	ALL	headspace equilibrium method+boundary layer method (BLM)	Yuqing Miao et al., 2020
East Lake Region	Lake Chaohu-central part (seasonal )	117.57	31.56	16.2	770	2.5	1.9	0.2256	40.5				0.154	2017.8	ALL	headspace equilibrium method+boundary layer method (BLM)	Yuqing Miao et al., 2020
East Lake Region	Lake Chaohu-central part (seasonal )	117.57	31.56	16.2	770	2.5	1.2	0.0429	40.2				0.0572	2017.11	ALL	headspace equilibrium method+boundary layer method (BLM)	Yuqing Miao et al., 2020
East Lake Region	Lake Chaohu-central part (overall )	117.57	31.56	16.2	770	2.5	1.8	0.111	34.2				0.154	2017.2-2017.11	ALL	headspace equilibrium method+boundary layer method (BLM)	Yuqing Miao et al., 2020
East Lake Region	Lake Chaohu-western part (seasonal )	117.57	31.56	16.2	770	2.5	3.1	0.1015	7				0.352	2017.2	ALL	headspace equilibrium method+boundary layer method (BLM)	Yuqing Miao et al., 2020
East Lake Region	Lake Chaohu-western part (seasonal )	117.57	31.56	16.2	770	2.5	5.4	0.2543	152.3				0.5368	2017.4	ALL	headspace equilibrium method+boundary layer method (BLM)	Yuqing Miao et al., 2020
East Lake Region	Lake Chaohu-western part (seasonal )	117.57	31.56	16.2	770	2.5	2.1	0.1088	24.9				0.2288	2017.8	ALL	headspace equilibrium method+boundary layer method (BLM)	Yuqing Miao et al., 2020
East Lake Region	Lake Chaohu-western part (seasonal )	117.57	31.56	16.2	770	2.5	2.6	0.081	33.2				0.5544	2017.11	ALL	headspace equilibrium method+boundary layer method (BLM)	Yuqing Miao et al., 2020
East Lake Region	Lake Chaohu-western part (overall )	117.57	31.56	16.2	770	2.5	3.3	0.1364	35.6				0.418	2017.2-2017.11	ALL	headspace equilibrium method+boundary layer method (BLM)	Yuqing Miao et al., 2020
East Lake Region	Taihu Lake-Shatang River-Estuary	119.985	31.4237	15.8	2338	1.9	5.32082	0.122548	5				2.316	2017.11	Estuary	static chamber method	Yiwen Zhou et al., 2019
East Lake Region	Taihu Lake-Shatang River-lake	119.994	31.4342	15.8	2338	1.9	3.4471	0.185466	5				1.025	2017.11	Lake	static chamber method	Yiwen Zhou et al., 2019
East Lake Region	Taihu Lake-Jiaodu River-Estuary	119.939	31.343	15.8	2338	1.9	4.67577	0.10089	5				2.847	2017.11	Estuary	static chamber method	Yiwen Zhou et al., 2019
East Lake Region	Taihu Lake-Jiaodu River-lake	119.955	31.3421	15.8	2338	1.9	3.37543	0.111205	5				1.31	2017.11	Lake	static chamber method	Yiwen Zhou et al., 2019
East Lake Region	Taihu Lake-Dapu River-Estuary	119.917	31.2912	15.8	2338	1.9	2.98635	0.126493	5				1.348	2017.11	Estuary	static chamber method	Yiwen Zhou et al., 2019
East Lake Region	Taihu Lake-Dapu River-lake	119.934	31.2895	15.8	2338	1.9	2.24915	0.126123	5				0.228	2017.11	Lake	static chamber method	Yiwen Zhou et al., 2019
East Lake Region	Poyang Lake-Ⅰ (Spatial)	116.112	29.5837	17.7	2398.32	6.2	1.33	0.038	2.91				0.0968	2013.7	narrow north lake	headspace-equilibrium method	Jingya Xue et al., 2019
East Lake Region	Poyang Lake-Ⅱ (Spatial)	116.073	29.1988	17.7	2398.32	6.2	1.134	0.048	5.14				0.0264	2013.7	open lake	headspace-equilibrium method	Jingya Xue et al., 2019
East Lake Region	Poyang Lake-Ⅲ (Spatial)	116.374	28.9615	17.7	2398.32	6.2	1.162	0.03	2.6				0.2024	2013.7	south estuarine delta	headspace-equilibrium method	Jingya Xue et al., 2019
East Lake Region	Poyang Lake-Ⅳ (Spatial)	116.48	29.1822	17.7	2398.32	6.2	0.826	0.1	0.8				0.0704	2013.7	estuarine delta of Tongjin River	headspace-equilibrium method	Jingya Xue et al., 2019
East Lake Region	Poyang Lake-Ⅴ (Spatial)	116.319	29.1906	17.7	2398.32	6.2	0.826	0.058	2.69				0.0132	2013.7	semi-closed wetland	headspace-equilibrium method	Jingya Xue et al., 2019
East Lake Region	Lake Taihu-Northwest Zone and Meiliang Bay	120.217	31.4	15.8	2338	1.9	3.234	0.17	35.74				0.5016	2012-2016	eutrophic zone	bulk diffusion model	Qitao Xiao et al., 2018
East Lake Region	Lake Taihu-Transition zone	120.217	31.4	15.8	2338	1.9	2.128	0.1	20.19				0.0616	2012-2016	transition zone	bulk diffusion model	Qitao Xiao et al., 2018
East Lake Region	Lake Taihu-Submerged macrophyte zone	120.217	31.4	15.8	2338	1.9	1.288	0.05	8.88				0.0572	2012-2016	Submerged macrophyte zone	bulk diffusion model	Qitao Xiao et al., 2018
East Lake Region	Huangjiahu	115.5	28.25	17.3	46.53	4.1	2.08	0.201	38.6	1420.8				Oct. 2011	Pelagic zone	Diffusion modeling	Lai et al., 2012
East Lake Region	Lake Taihu-Meiliang Bay	120.175	31.4668	15.8	2338	1.9	2.18	0.087	27.1		14.08			2011-2013	All	bulk diffusion model	Qitao Xiao et al., 2017
East Lake Region	Lake Taihu-Gonghu Bay	120.315	31.3885	15.8	2338	1.9	1.81	0.065	32.3333		10.24			2011-2013	All	bulk diffusion model	Qitao Xiao et al., 2017
East Lake Region	Lake Taihu-East Zone	120.368	31.1933	15.8	2338	1.9	1.23	0.033	8.83333		2.672			2011-2013	All	bulk diffusion model	Qitao Xiao et al., 2017
East Lake Region	Lake Taihu-Dongtaihu Bay	120.454	31.0233	15.8	2338	1.9	0.9	0.037	18.6875		3.632			2011-2013	All	bulk diffusion model	Qitao Xiao et al., 2017
East Lake Region	Lake Taihu-Southwest Zone	120.142	31.0359	15.8	2338	1.9	2.01	0.067	15		0.624			2011-2013	All	bulk diffusion model	Qitao Xiao et al., 2017
East Lake Region	Lake Taihu-Northwest Zone	119.988	31.3113	15.8	2338	1.9	2.58	0.094	30.03		3.056			2011-2013	All	bulk diffusion model	Qitao Xiao et al., 2017
East Lake Region	Lake Taihu-Central Zone	120.142	31.2554	15.8	2338	1.9	1.89	0.072	17		0.4			2011-2013	All	bulk diffusion model	Qitao Xiao et al., 2017
East Lake Region	Lake Taihu-Whole lake	120.201	31.2009	15.8	2338	1.9	1.9	0.069	18.6875		1.472			2011-2013	All	bulk diffusion model	Qitao Xiao et al., 2017
East Lake Region	Huashen Lake	118.793	31.9937	15.6	0.056	4	0.6	0.12	5	179.76		5.496		2018.8-2018.9		floating static chamber	Yiwen Zhou et al., 2020
East Lake Region	Tianjin-L01						3.54						0.03916	2011.7		headspace equilibrium technique	Xiao-Long Liu et al., 2015
East Lake Region	Tianjin-L02						4.06						0.02332	2011.7		headspace equilibrium technique	Xiao-Long Liu et al., 2015
East Lake Region	Tianjin-L03						0.61						0.00616	2011.7		headspace equilibrium technique	Xiao-Long Liu et al., 2015
East Lake Region	Tianjin-L04						2.1						-0.00352	2011.7		headspace equilibrium technique	Xiao-Long Liu et al., 2015
East Lake Region	Tianjin-L05						1.03						0	2011.7		headspace equilibrium technique	Xiao-Long Liu et al., 2015
East Lake Region	Tianjin-L06						0.16						-0.00176	2011.7		headspace equilibrium technique	Xiao-Long Liu et al., 2015
East Lake Region	Tianjin-L07						0.21						0.00264	2011.7		headspace equilibrium technique	Xiao-Long Liu et al., 2015
East Lake Region	Tianjin-L08						0.53						-0.00308	2011.7		headspace equilibrium technique	Xiao-Long Liu et al., 2015
East Lake Region	Tianjin-L09						1.94						0.022	2011.7		headspace equilibrium technique	Xiao-Long Liu et al., 2015
East Lake Region	Tianjin-L10						0.62						-0.00616	2011.7		headspace equilibrium technique	Xiao-Long Liu et al., 2015
East Lake Region	Wulongtan Lake	118.772	32.0512	15.6	0.06	1.6						2384.64		2012.7	center	floating static chamber technique	Songhe Zhang et al., 2014
East Lake Region	North L. Taihu	120.201	31.2009	15.8	2338	1.8	3.52	0.13					2.4156	2003.7		headspace equilibrium technique	Shilu Wang et al., 2009
East Lake Region	North L. Taihu	120.201	31.2009	15.8	2338	1.8	3.52	0.13					1.0912	2003.9		headspace equilibrium technique	Shilu Wang et al., 2009
East Lake Region	Middle L. Taihu	120.201	31.2009	15.8	2338	1.8	2	0.07					0.3652	2003.7		headspace equilibrium technique	Shilu Wang et al., 2009
East Lake Region	Middle L. Taihu	120.201	31.2009	15.8	2338	1.8	2	0.07					0.3212	2003.9		headspace equilibrium technique	Shilu Wang et al., 2009
East Lake Region	South L. Taihu	120.201	31.2009	15.8	2338	1.8	0.77	0.03					-0.0748	2003.7		headspace equilibrium technique	Shilu Wang et al., 2009
East Lake Region	South L. Taihu	120.201	31.2009	15.8	2338	1.8	0.77	0.03					0.22	2003.9		headspace equilibrium technique	Shilu Wang et al., 2009
East Lake Region	Lake Taihu-averages	120.201	31.2009	15.8	2338	1.8	2.08	0.07					0.616	2003.7		headspace equilibrium technique	Shilu Wang et al., 2009
East Lake Region	Lake Taihu-averages	120.201	31.2009	15.8	2338	1.8	2.08	0.07					0.4268	2003.9		headspace equilibrium technique	Shilu Wang et al., 2009
East Lake Region	Junshan	116.35	28.5	18.2	192.5	3.7	0.62	0.05	2.06	289.96	7.90001			2003-2004	Pelagic zone	CH4 and CO2 flux by modeling	Xing, 2007
East Lake Region	Lake Caohu	117.5	31.5667	16.2	739.6	2.69	1.14	0.065	26.54	-385.92		0.504		Dec. 2004 to Jan.2005	Pelagic zone	Floating static chambers with GC	Chen et al., 2006; 2007
East Lake Region	Lake Chaohu	117.5	31.5667	16.2	739.6	2.7				-372		0.528	-0.072	Dirunal samling (Dec. 2004)	Pelagic zone	Floating static chambers with GC	Li XH, 2005
East Lake Region	Lake Dianshan	120.95	31.1167	15.7	2338	2.1				1363.92				Aug. 2011	Pelagic zone	Floating static chambers with GC	Zhang et al., 2013
East Lake Region	Lake Donghu	114.4	30.5647	17.3	27.9	2.2			34.5	331.2		23.28		Apr. 2003 to Mar. 2004	Pelagic zone	Floating static chambers with GC	Xing et al., 2005
East Lake Region	Lake Donghu	114.4	30.5647	17.3	27.9	2.2	0.96	0.027	20	-60.72		8.64		Spring	Pelagic zone	Floating static chambers with GC	Xing et al., 2005
East Lake Region	Lake Donghu	114.4	30.5647	17.3	27.9	2.2	1.47	0.033	34.6	-136.56		71.28		Summer	Pelagic zone	Floating static chambers with GC	Xing et al., 2005
East Lake Region	Lake Donghu	114.4	30.5647	17.3	27.9	2.2	1.75	0.033	2.9	139.68		15.36		Autumn	Pelagic zone	Floating static chambers with GC	Xing et al., 2005
East Lake Region	Lake Donghu	114.4	30.5647	17.3	27.9	2.2	0.64	0.005	10	1411.2		6.72		Winter	Pelagic zone	Floating static chambers with GC	Xing et al., 2005
East Lake Region	Lake Donghu	114.4	30.5647	17.3	27.9	2.2	2.11	0.35	106.28	236.88		27.264		Apr. 2003 to Mar. 2004	Pelagic zone	Floating static chambers with GC	Yang, 2004; Xing, 2004
East Lake Region	Lake Donghu	114.4	30.5647	17.3	27.9	2.2	1.69	0.31	83.65	319.92		25.704		Apr. 2003 to Mar. 2004	Pelagic zone	Floating static chambers with GC	Yang, 2004; Xing, 2004
East Lake Region	Lake Donghu	114.4	30.5647	17.3	27.9	2.2	1.28	0.12	47.69	625.44		23.808		Apr. 2003 to Mar. 2004	Pelagic zone	Floating static chambers with GC	Yang, 2004; Xing, 2004
East Lake Region	Lake Donghu	114.4	30.5647	17.3	27.9	2.2	2.4	0.36	134	-244.32		252.936		Diurnal sampling (May)	Pelagic zone	Floating static chambers with GC	Xing, 2004; Xing et al., 2004
East Lake Region	Lake Donghu	114.4	30.5647	17.3	27.9	2.2	1.47	0.033	34.6	3659.28		165.144		Diurnal sampling (Jun.)	Pelagic zone	Floating static chambers with GC	Xing, 2004; Xing et al., 2004
East Lake Region	Lake Donghu	114.4	30.5647	17.3	27.9	2.2	1.61	0.033	18.75	1505.52		331.44		Diurnal sampling (Aug.)	Pelagic zone	Floating static chambers with GC	Xing, 2004; Xing et al., 2004
East Lake Region	Lake Donghu	114.4	30.5647	17.3	27.9	2.2	0.64	0.005	10	972.72		8.52		Diurnal sampling (Nov)	Pelagic zone	Floating static chambers with GC	Xing, 2004; Xing et al., 2004
East Lake Region	Lake Donghu	114.4	30.5647	17.3	27.9	2.2	1.22	0.097	13	981.36		11.448		Diurnal sampling (Jan.)	Pelagic zone	Floating static chambers with GC	Xing, 2004; Xing et al., 2004
East Lake Region	Lake Donghu	114.4	30.5647	17.3	32	2.2	1.69	0.26	57.6	384.72		26.64		Annual flux (Apr. 2003-Mar. 2004)	Pelagic zone	Floating static chambers with GC	Xing, 2007
East Lake Region	Lake Donghu	114.4	30.5647	17.3	32	2.2	1.18	0.23	52.6	238.56		24		Annual flux (Apr. 2004-Mar. 2005)	Pelagic zone	Floating static chambers with GC	Xing, 2007
East Lake Region	Lake Donghu	114.4	30.5647	17.3	32	2.2	1.36	0.11	54	152.16		22.08		Annual flux (Apr. 2005-Mar. 2006)	Pelagic zone	Floating static chambers with GC	Xing, 2007
East Lake Region	Lake Donghu (Seasonal)	114.4	30.5647	17.3	27.9	2.2	0.96	0.027	20	42.984		8.592		Spring (2003-2004)	Pelagic zone	Floating static chambers with GC	Yang, 2004
East Lake Region	Lake Donghu (Seasonal)	114.4	30.5647	17.3	27.9	2.2	1.47	0.033	34.6	-66.36		63.48		Summer (2003-2004)	Pelagic zone	Floating static chambers with GC	Yang, 2004
East Lake Region	Lake Donghu (Seasonal)	114.4	30.5647	17.3	27.9	2.2	1.75	0.033	2.9	173.616		14.136		Autumn (2003-2004)	Pelagic zone	Floating static chambers with GC	Yang, 2004
East Lake Region	Lake Donghu (Seasonal)	114.4	30.5647	17.3	27.9	2.2	0.64	0.005	1	1372.44		5.16		Winter (2003-2004)	Pelagic zone	Floating static chambers with GC	Yang, 2004
East Lake Region	Lake Donghu (Spatial)	114.4	30.5647	17.3	32	2.2	2.11	0.35	74.8	236.88		27.12		8-12 Am (Apr. 2003 to Mar. 2004)	Pelagic zone (S1)	Floating static chambers with GC	Xing, 2007
East Lake Region	Lake Donghu (Spatial)	114.4	30.5647	17.3	32	2.2	1.69	0.31	52.6	319.92		25.68		8-12 Am (Apr. 2003 to Mar. 2004)	Pelagic zone (S2)	Floating static chambers with GC	Xing, 2007
East Lake Region	Lake Donghu (Spatial)	114.4	30.5647	17.3	32	2.2	1.28	0.12	28.9	625.44		23.76		8-12 Am (Apr. 2003 to Mar. 2004)	Pelagic zone (S3)	Floating static chambers with GC	Xing, 2007
East Lake Region	Lake Donghu-1 (annual)	114.358	30.5519	17.3	32	2.2	1.27442	0.184978	27.439	231.737				2008		boundary layer model	Xingcheng Yan et al., 2021
East Lake Region	Lake Donghu-1 (annual)	114.358	30.5519	17.3	32	2.2	0.977818	0.22882	38.1098	-71.8563				2009		boundary layer model	Xingcheng Yan et al., 2021
East Lake Region	Lake Donghu-1 (annual)	114.358	30.5519	17.3	32	2.2	1.05863	0.171036	30.4878	-120.359				2010		boundary layer model	Xingcheng Yan et al., 2021
East Lake Region	Lake Donghu-1 (annual)	114.358	30.5519	17.3	32	2.2	1.15944	0.117321	22.8659	-167.066				2011		boundary layer model	Xingcheng Yan et al., 2021
East Lake Region	Lake Meiliang Bay	120.25	31.25	15.8	2338	2.2	6.7	0.3	57			240	1.8048	Aug. 2003 to Aug.2004	Infralittoral zone	Floating static chambers with GC	Wang et al., 2006a, b
East Lake Region	Lake Meiliang Bay	120.25	31.25	15.8	2338	2.2						60	8.748	Aug. 2003 to Aug.2004	Eulittoral zone	Floating static chambers with GC	Wang et al., 2006a, b
East Lake Region	Lake Meiliang Bay	120.25	31.25	15.8	2338	2.2						2.4	3.324	Aug. 2003 to Aug.2004	supralittoral zone	Floating static chambers with GC	Wang et al., 2006a, b
East Lake Region	Lake Meiliang Bay	120.25	31.25	15.8	2338	2.2						12	0.456	Aug. 2003 to Aug.2004	Pelagic zone	Floating static chambers with GC	Wang et al., 2006a, b
East Lake Region	Lake Meiliang Bay	120.217	31.5	15.8	2338	2.2						65.76		Sep. 2003 to Feb. 2004	Littoral zone	Floating static chambers with GC	Wang et al., 2006c
East Lake Region	Lake Meiliang Bay	120.217	31.5	15.8	2338	2.2						252.72		Sep.-Nov.2003	Littoral zone	Floating static chambers with GC	Wang et al., 2006c
East Lake Region	Lake Meiliang Bay	120.217	31.5	15.8	2338	2.2						2.64		Dec.-Feb. 2003-2004	Littoral zone	Floating static chambers with GC	Wang et al., 2006c
East Lake Region	Lake Meiliang Bay	120.217	31.5	15.8	2338	2.2							3.216	Sep. 2003 – Nov. 2003	supralittoral zone	Floating static chambers with GC	Wang et al., 2006d
East Lake Region	Lake Meiliang Bay	120.217	31.5	15.8	2338	2.2							11.088	Sep. 2003 – Nov. 2003	Eulittoral zone	Floating static chambers with GC	Wang et al., 2006d
East Lake Region	Lake Meiliang Bay	120.217	31.5	15.8	2338	2.2							1.68	Sep. 2003 – Nov. 2003	Infralittoral zone	Floating static chambers with GC	Wang et al., 2006d
East Lake Region	Lake Meiliang Bay	120.217	31.5	15.8	2338	2.2							0.264	Sep. 2003 – Nov. 2003	Pelagic zone	Floating static chambers with GC	Wang et al., 2006d
East Lake Region	Lake Meiliang Bay	120.217	31.5	15.8	2338	2.2							-0.744	Dec. 2003-Feb. 2004	supralittoral zone	Floating static chambers with GC	Wang et al., 2006d
East Lake Region	Lake Meiliang Bay	120.217	31.5	15.8	2338	2.2							3.12	Dec. 2003-Feb. 2004	Eulittoral zone	Floating static chambers with GC	Wang et al., 2006d
East Lake Region	Lake Meiliang Bay	120.217	31.5	15.8	2338	2.2							1.08	Dec. 2003-Feb. 2004	Infralittoral zone	Floating static chambers with GC	Wang et al., 2006d
East Lake Region	Lake Meiliang Bay	120.217	31.5	15.8	2338	2.2							0.216	Dec. 2003-Feb. 2004	Pelagic zone	Floating static chambers with GC	Wang et al., 2006d
East Lake Region	Lake Meiliang Bay	120.217	31.5	15.8	2338	2.2							2.592	Sep. 2003 – Nov. 2003	Bare infralittoral	Floating static chambers with GC	Wang et al., 2006d
East Lake Region	Lake Meiliang Bay	120.217	31.5	15.8	2338	2.2							1.992	Dec. 2003-Feb. 2004	Bare infralittoral	Floating static chambers with GC	Wang et al., 2006d
East Lake Region	Lake Taihu	120.217	31.5	15.8	2338	2.2							0.08472	Sep. 2000-Sep. 2001	Pelagic zone	Floating static chambers with GC	Xiong et al., 2002
East Lake Region	Lake Meiliang Bay	120.217	31.5	15.8	2338	2.2							0.432	Spring 2003	Pelagic zone	Floating static chambers with GC	Wu et al., 2007
East Lake Region	Lake Meiliang Bay	120.217	31.5	15.8	2338	2.2							1.56	Summer 2003	Pelagic zone	Floating static chambers with GC	Wu et al., 2007
East Lake Region	Lake Meiliang Bay	120.217	31.5	15.8	2338	2.2							0.072	Autumn 2003	Pelagic zone	Floating static chambers with GC	Wu et al., 2007
East Lake Region	Lake Meiliang Bay	120.217	31.5	15.8	2338	2.2							0.048	Winter 2003	Pelagic zone	Floating static chambers with GC	Wu et al., 2007
East Lake Region	East Taihu	120.217	31.5	15.8	2338	2.2							1.584	Spring 2003	Pelagic zone	Floating static chambers with GC	Wu et al., 2007
East Lake Region	Lake Taihu	120.217	31.5	15.8	2338	2.2							0.24	Spring 2003	Pelagic zone	Floating static chambers with GC	Wu et al., 2007
East Lake Region	Lake Donghu-1 (annual)	114.358	30.5519	17.3	32	2.2	1.79668	0.142466	30.7927	-244.311				2012		boundary layer model	Xingcheng Yan et al., 2021
East Lake Region	Lake Donghu-1 (annual)	114.358	30.5519	17.3	32	2.2	2.39409	0.123708	32.9268	-308.982				2013		boundary layer model	Xingcheng Yan et al., 2021
East Lake Region	Lake Donghu-1 (annual)	114.358	30.5519	17.3	32	2.2	1.30281	0.126089	29.878	-136.527				2014		boundary layer model	Xingcheng Yan et al., 2021
East Lake Region	Lake Donghu-1 (annual)	114.358	30.5519	17.3	32	2.2	2.41681	0.233351	58.2317	131.138				2015		boundary layer model	Xingcheng Yan et al., 2021
East Lake Region	Lake Donghu-1 (annual)	114.358	30.5519	17.3	32	2.2	3.03411	0.258496	52.1341	-292.814				2016		boundary layer model	Xingcheng Yan et al., 2021
East Lake Region	Lake Donghu-2 (annual)	114.377	30.5646	17.3	32	2.2	1.43336	0.158962	27.439	330.539				2008		boundary layer model	Xingcheng Yan et al., 2021
East Lake Region	Lake Donghu-2 (annual)	114.377	30.5646	17.3	32	2.2	0.759309	0.201989	31.4024	194.012				2009		boundary layer model	Xingcheng Yan et al., 2021
East Lake Region	Lake Donghu-2 (annual)	114.377	30.5646	17.3	32	2.2	0.820184	0.15315	22.8659	88.024				2010		boundary layer model	Xingcheng Yan et al., 2021
East Lake Region	Lake Donghu-2 (annual)	114.377	30.5646	17.3	32	2.2	0.940936	0.104313	14.6341	-5.38922				2011		boundary layer model	Xingcheng Yan et al., 2021
East Lake Region	Lake Donghu-2 (annual)	114.377	30.5646	17.3	32	2.2	1.59797	0.122954	21.3415	-233.533				2012		boundary layer model	Xingcheng Yan et al., 2021
East Lake Region	Lake Donghu-2 (annual)	114.377	30.5646	17.3	32	2.2	1.99677	0.0976921	25.3049	-289.222				2013		boundary layer model	Xingcheng Yan et al., 2021
East Lake Region	Lake Donghu-2 (annual)	114.377	30.5646	17.3	32	2.2	1.0842	0.10739	22.2561	317.964				2014		boundary layer model	Xingcheng Yan et al., 2021
East Lake Region	Lake Donghu-2 (annual)	114.377	30.5646	17.3	32	2.2	2.33734	0.158554	91.7683	194.012				2015		boundary layer model	Xingcheng Yan et al., 2021
East Lake Region	Lake Donghu-2 (annual)	114.377	30.5646	17.3	32	2.2	3.45129	0.176382	46.6463	-244.311				2016		boundary layer model	Xingcheng Yan et al., 2021
East Lake Region	Lake Donghu-3 (annual)	114.395	30.5926	17.3	32	2.2	1.51283	0.095543	13.1098	488.623				2008		boundary layer model	Xingcheng Yan et al., 2021
East Lake Region	Lake Donghu-3 (annual)	114.395	30.5926	17.3	32	2.2	0.580467	0.114185	18.2927	269.461				2009		boundary layer model	Xingcheng Yan et al., 2021
East Lake Region	Lake Donghu-3 (annual)	114.395	30.5926	17.3	32	2.2	0.740714	0.105996	13.7195	149.102				2010		boundary layer model	Xingcheng Yan et al., 2021
East Lake Region	Lake Donghu-3 (annual)	114.395	30.5926	17.3	32	2.2	0.980671	0.101061	9.14634	26.9461				2011		boundary layer model	Xingcheng Yan et al., 2021
East Lake Region	Lake Donghu-3 (annual)	114.395	30.5926	17.3	32	2.2	1.73708	0.107506	13.4146	-202.994				2012		boundary layer model	Xingcheng Yan et al., 2021
East Lake Region	Lake Donghu-3 (annual)	114.395	30.5926	17.3	32	2.2	2.13584	0.0928141	19.5122	-206.587				2013		boundary layer model	Xingcheng Yan et al., 2021
East Lake Region	Lake Donghu-3 (annual)	114.395	30.5926	17.3	32	2.2	1.32261	0.122024	33.5366	247.904				2014		boundary layer model	Xingcheng Yan et al., 2021
East Lake Region	Lake Donghu-3 (annual)	114.395	30.5926	17.3	32	2.2	1.93998	0.234159	80.1829	494.012				2015		boundary layer model	Xingcheng Yan et al., 2021
East Lake Region	Lake Donghu-3 (annual)	114.395	30.5926	17.3	32	2.2	2.33875	0.158493	52.7439	-274.85				2016		boundary layer model	Xingcheng Yan et al., 2021
East Lake Region	Lake Dongting	112.483	29.1667	17.4	2432.5	6.39	1.75	0.055	3.08	-570.72		4.776		Dec. 2004 to Jan.2005	Pelagic zone	Floating static chambers with GC	Chen et al., 2006; 2007
East Lake Region	Lake Dongting	112.483	29.1667	17.4	2432.5	6.39	1.75	0.055	3.08	-156.24			0.048	Dirunal samling (Dec. 2004)	Pelagic zone	Floating static chambers with GC	Li XH, 2005
East Lake Region	Lake Hongzehu	118.517	33.3833	15	1576.9	1.77	2.78	0.077	3.4	-637.44		0.456		Dec. 2004 to Jan.2005	Pelagic zone	Floating static chambers with GC	Chen et al., 2006; 2007
East Lake Region	Lake Hongzehu	118.517	33.3833	15	1576.9	1.77	2.78	0.077	3.4	-637.44		0.168	-0.24	Dirunal samling (Dec. 2004)	Pelagic zone	Floating static chambers with GC	Li XH, 2005
East Lake Region	Lake Meiliang Bay	120.217	31.5	15.8	2338	2.2				192				Dec. 2003-Feb. 2004	Pelagic zone	Floating static chambers with GC	LiXH et al., 2005
East Lake Region	Lake Nansihu	116.933	34.8833	14.6	1097.6	1.46	2.48	0.032	28.22	663.36		0.816		Dec. 2004 to Jan.2005	Pelagic zone	Floating static chambers with GC	Chen et al., 2006; 2007
East Lake Region	Lake Nansihu	116.933	34.8833	14.6	1097.6	1.46	2.48	0.032	28.22	149.04		0.624	0.096	Dirunal samling (Dec. 2004)	Pelagic zone	Floating static chambers with GC	Li XH, 2005
East Lake Region	Lake Poyang	116.3	29.0833	17.7	2933	8.4	1.5	0.051	0.48	858.24		19.632		Dec. 2004 to Jan.2005	Pelagic zone	Floating static chambers with GC	Chen et al., 2006; 2007
East Lake Region	Lake Poyang	116.3	29.0833	17.7	2933	5.1	1.5	0.051	0.48	726.48		19.848	0.504	Dirunal samling (Dec. 2004)	Pelagic zone	Floating static chambers with GC	Li XH, 2005
East Lake Region	Lake Poyang	116.3	29.0833	17.7	2933	6.8	1.03771	0.0726471	2.43882	874.32		4.152	0.41808	Oct. 2010	Pelagic zone	Floating static chambers with GC	Liu et al., 2013
East Lake Region	Lake Poyang	116.3	29.0833	17.7	2933	6.8	1.12961	0.0493333	2.21902	396.48		6	0.06864	Spring	Pelagic zone	Floating static chambers with GC	Lin, 2012
East Lake Region	Lake Poyang	116.3	29.0833	17.7	2933	6.8	0.998882	0.0508824	2.68392	583.44		12.24	0.09288	Summer	Pelagic zone	Floating static chambers with GC	Lin, 2012
East Lake Region	Lake Poyang	116.3	29.0833	17.7	2933	6.8	1.05231	0.0648039	2.52549	381.84		6.96	0.036	Autumn	Pelagic zone	Floating static chambers with GC	Lin, 2012
East Lake Region	Lake Poyang	116.3	29.0833	17.7	2933	6.8	1.39071	0.0546078	2.31784	174.72		1.68	0.054	Winter	Pelagic zone	Floating static chambers with GC	Lin, 2012
East Lake Region	Lake Taihu	120.25	31.25	15.8	2338	2.2				-18.96				Daily in Spring (2003-2005)	Pelagic zone	Floating static chambers with GC	Ji et al., 2006
East Lake Region	Lake Taihu	120.25	31.25	15.8	2338	2.2				-117.36				Daily in Summer (2003-2005)	Pelagic zone	Floating static chambers with GC	Ji et al., 2006
East Lake Region	East Taihu Lake	120.5	31.0333	15.8	131	1.2						57.384		May. 2004	Pelagic zone	Floating static chambers with GC	Li XH, 2005
East Lake Region	Lake Taihu	120.25	31.25	15.8	2338	2.2				-97.44				Daily in Autumn (2003-2005)	Pelagic zone	Floating static chambers with GC	Ji et al., 2006
East Lake Region	Lake Taihu	120.25	31.25	15.8	2338	2.2				-61.44				Daily in Winter (2003-2005)	Pelagic zone	Floating static chambers with GC	Ji et al., 2006
East Lake Region	Lake Taihu	120.25	31.25	15.8	2338	2.2				1162.46				Spring (2003-2005)	Pelagic zone	Floating static chambers with GC	Ji et al., 2006
East Lake Region	Lake Taihu	120.25	31.25	15.8	2338	2.2				1371.9				Summer (2003-2005)	Pelagic zone	Floating static chambers with GC	Ji et al., 2006
East Lake Region	Lake Taihu	120.25	31.25	15.8	2338	2.2				1213.43				Autumn (2003-2005)	Pelagic zone	Floating static chambers with GC	Ji et al., 2006
East Lake Region	Lake Taihu	120.25	31.25	15.8	2338	2.2				1341.29				Winter (2003-2005)	Pelagic zone	Floating static chambers with GC	Ji et al., 2006
East Lake Region	Lake Taihu	120.25	31.25	15.8	2338	2.2				58.08				Daily sampling in Apr. 2003	Pelagic zone (S1)	Floating static chambers with GC	Zhang et al., 2004
East Lake Region	Lake Taihu	120.25	31.25	15.8	2338	2.2				120.96				Daily sampling in Apr. 2003	Pelagic zone (S2)	Floating static chambers with GC	Zhang et al., 2004
East Lake Region	Lake Taihu	120.25	31.25	15.8	2338	2.2				279.12				Daily sampling in Apr. 2003	Pelagic zone (S3)	Floating static chambers with GC	Zhang et al., 2004
East Lake Region	Lake Taihu (Center)	120.25	31.25	15.8	2338	2.2				121.44				Dirunal (Spring)	Pelagic zone	Floating static chambers with GC	Li XH, 2005
East Lake Region	Lake Taihu (Meiliang Bay)	120.25	31.25	15.8	2338	2.2				965.28			1.08	9:00 Am (Spring 2003)	Pelagic zone	Floating static chambers with GC	Li XH, 2005
East Lake Region	Lake Taihu (Meiliang Bay)	120.25	31.25	15.8	2338	2.2				1511.76				9:00 Am (Summer)	Pelagic zone	Floating static chambers with GC	Li XH, 2005
East Lake Region	Lake Taihu (Meiliang Bay)	120.25	31.25	15.8	2338	2.2				383.04				9:00 Am (Autumn)	Pelagic zone	Floating static chambers with GC	Li XH, 2005
East Lake Region	Lake Taihu (Meiliang Bay)	120.25	31.25	15.8	2338	2.2				392.64				9:00 Am (Winter)	Pelagic zone	Floating static chambers with GC	Li XH, 2005
East Lake Region	Lake Taihu (Meiliang Bay)	120.25	31.25	15.8	2338	2.2				342.48		0.72	0.528	Jan.2004	Pelagic zone	Floating static chambers with GC	Li XH, 2005
East Lake Region	Lake Taihu (Meiliang Bay)	120.25	31.25	15.8	2338	2.2				607.2		1.2	0.864	Feb. 2004	Pelagic zone	Floating static chambers with GC	Li XH, 2005
East Lake Region	Lake Taihu (Meiliang Bay)	120.25	31.25	15.8	2338	2.2				1967.04		4.416	1.656	Mar. 2004	Pelagic zone	Floating static chambers with GC	Li XH, 2005
East Lake Region	Lake Taihu (Meiliang Bay)	120.25	31.25	15.8	2338	2.2				1604.64		3.024	1.512	Apr. 2004	Pelagic zone	Floating static chambers with GC	Li XH, 2005
East Lake Region	Lake Taihu (Meiliang Bay)	120.25	31.25	15.8	2338	2.2				-2.16		1.392	0.432	May. 2004	Pelagic zone	Floating static chambers with GC	Li XH, 2005
East Lake Region	Lake Taihu (Meiliang Bay)	120.25	31.25	15.8	2338	2.2				529.92		7.608	2.472	Jun. 2004	Pelagic zone	Floating static chambers with GC	Li XH, 2005
East Lake Region	Lake Poyang	116.3	29.0833	17.7	2933	6.8							0.1536		Pelagic zone	Floating static chambers with GC	Lin, 2012
East Lake Region	Lake Taihu (Meiliang Bay)	120.25	31.25	15.8	2338	2.2				2035.2		9.48	0.2616	Jul. 2004	Pelagic zone	Floating static chambers with GC	Li XH, 2005
East Lake Region	Lake Taihu (Meiliang Bay)	120.25	31.25	15.8	2338	2.2				1932.24		5.448	0.456	Aug. 2004	Pelagic zone	Floating static chambers with GC	Li XH, 2005
East Lake Region	Lake Taihu (Meiliang Bay)	120.25	31.25	15.8	2338	2.2				2106.24		9.36	0.936	Sep. 2004	Pelagic zone	Floating static chambers with GC	Li XH, 2005
East Lake Region	Lake Taihu (Meiliang Bay)	120.25	31.25	15.8	2338	2.2				1559.76		8.784	1.728	Oct. 2004	Pelagic zone	Floating static chambers with GC	Li XH, 2005
East Lake Region	Lake Taihu (Meiliang Bay)	120.25	31.25	15.8	2338	2.2				488.16		2.784	0.072	Nov. 2004	Pelagic zone	Floating static chambers with GC	Li XH, 2005
East Lake Region	Lake Taihu (Meiliang Bay)	120.25	31.25	15.8	2338	2.2				263.28		0.96	0.144	Dec. 2004	Pelagic zone	Floating static chambers with GC	Li XH, 2005
East Lake Region	Lake Taihu (Meiliang Bay)	120.25	31.25	15.8	2338	2.2				-19.2		0.336		Dirunal (Spring)	Pelagic zone	Floating static chambers with GC	Li XH, 2005
East Lake Region	Lake Taihu (Meiliang Bay)	120.25	31.25	15.8	2338	2.2				-122.88		2.208		Dirunal (Summer)	Pelagic zone	Floating static chambers with GC	Li XH, 2005
East Lake Region	Lake Taihu (Meiliang Bay)	120.25	31.25	15.8	2338	2.2				-126.96		3.6		Dirunal (Autumn)	Pelagic zone	Floating static chambers with GC	Li XH, 2005
East Lake Region	Lake Taihu (Meiliang Bay)	120.25	31.25	15.8	2338	2.2				-43.44		0.96		Dirunal (Winter)	Pelagic zone	Floating static chambers with GC	Li XH, 2005
East Lake Region	Lake Taihu (Meiliang Bay)	120.25	31.25	15.8	2338	2.2				968.88				Dirunal (Winter)	Pelagic zone	Floating static chambers with GC	Li XH, 2005
East Lake Region	Taihu	120.25	31.25	15.8	2338	2.2							0.532224		Pelagic zone	Floating static chambers with GC	Liu et al., 2013
East Lake Region	Lake Taihu (seasonal)	120.25	31.25	15.8	2338	2.2				683.76	2.16		0.43992	2011-2013	Pelagic	Headspace with GC	Xiao QT, 2014
East Lake Region	Lake Taihu	120.25	31.25	15.8	2338	2.2	2.08	0.07					0.61608	Jul. 2003	Pelagic zone	Floating static chambers with GC	Wang et al., 2009
East Lake Region	Lake Taihu	120.25	31.25	15.8	2338	2.2	2.08	0.07					0.42672	Sep. 2003	Pelagic zone	Floating static chambers with GC	Wang et al., 2009
East Lake Region	Lake Taihu (seasonal)	120.25	31.25	15.8	2338	2.2				1315.68	3.36		0.22008	2011-2013	Pelagic	Headspace with GC	Xiao QT, 2014
East Lake Region	Lake Taihu (seasonal)	120.25	31.25	15.8	2338	2.2				765.6	3.12		0.04392	2011-2013	Pelagic	Headspace with GC	Xiao QT, 2014
East Lake Region	Lake Taihu (seasonal)	120.25	31.25	15.8	2338	2.2				608.88	0.48		0.0264	2011-2013	Pelagic	Headspace with GC	Xiao QT, 2014
East Lake Region	Lake Taihu (Spatial)	120.012	31.413	15.8	2338	1.9	9.5	3.8	31.243	9965.71		1248.49		2020.6	Cyanobacteria accumulation area	floating static chamber	Chuanqiao Zhou et al., 2022
East Lake Region	Lake Taihu (Spatial)	120.018	31.411	15.8	2338	1.9	2.9	1.1	1.248			4.95		2020.6	Non-cyanobacteria accumulation area (Open lake)	floating static chamber	Chuanqiao Zhou et al., 2022
East Lake Region	Lake Taihu-Central Zone (non-water diversion peirod)	120.176	31.2931	15.8	2338	1.9	2.54	0.1	13.4	571.628				2002–2017	Central Zone	diffusion model	Qitao Xiao et al., 2021
East Lake Region	Lake Taihu-Central Zone (Water diversion peirod)	120.176	31.2931	15.8	2338	1.9	2.27	0.11	13.74	534.07				2002–2017	Central Zone	diffusion model	Qitao Xiao et al., 2021
East Lake Region	Lake Taihu-Gonghu Bay (non-water diversion peirod)	120.338	31.4093	15.8	2338	1.9	2.21	0.08	18.62	475.05				2002–2017	Bay	diffusion model	Qitao Xiao et al., 2021
East Lake Region	Lake Taihu-Gonghu Bay (Water diversion peirod)	120.338	31.4093	15.8	2338	1.9	2.56	0.1	14.86	857.747				2002–2017	Bay	diffusion model	Qitao Xiao et al., 2021
East Lake Region	Lake Taihu-Meiliang Bay	120.17	31.5	15.8	2338	1.9	3.12	0.13	30.12	880				1992-2015	Bay	diffusion model	Qitao Xiao, 2022
East Lake Region	Lake Taihu-Meiliang Bay	120.179	31.4204	15.8	2338	1.9		0.027	16.19	1743.28	8.64		2.64	2004	Open water		Yulin Wang et al., 2019
East Lake Region	Lake Taihu-Open water	120.17	31.3	15.8	2338	1.9	2.32	0.09	13.56	558.8				1992-2015	Open water	diffusion model	Qitao Xiao, 2022
East Lake Region	Lake Taihu-River mouth	120.17	31.53	15.8	2338	1.9	5.46	0.25	35.26	4118.4				1992-2015	River mouth	diffusion model	Qitao Xiao, 2022
East Lake Region	Lake Taihu-Transitional Zone (non-water diversion peirod)	120.239	31.3505	15.8	2338	1.9	2.34	0.1	20.68	443.727				2002–2017	Transitional Zone	diffusion model	Qitao Xiao et al., 2021
East Lake Region	Lake Taihu-Transitional Zone (Water diversion peirod)	120.239	31.3505	15.8	2338	1.9	2.26	0.1	17.63	600.829				2002–2017	Transitional Zone	diffusion model	Qitao Xiao et al., 2021
East Lake Region	Lake Wuli (annual)	120.25	31.52	15.8	8.6	2.1	3.98	0.12	30.34	1100				2000-2015	Pelagic zone	bulk diffusion model	Qitao Xian et al., 2020
East Lake Region	Lake Wuli-Autumn	120.25	31.52	15.8	8.6	2.1	3.17	0.12	22.9	1100				2000-2015	Pelagic zone	bulk diffusion model	Qitao Xian et al., 2020
East Lake Region	Lake Wuli-Spring	120.25	31.52	15.8	8.6	2.1	4.71	0.12	38.32	1000				2000-2015	Pelagic zone	bulk diffusion model	Qitao Xian et al., 2020
East Lake Region	Lake Wuli-Summer	120.25	31.52	15.8	8.6	2.1	2.71	0.16	47.29	1000				2000-2015	Pelagic zone	bulk diffusion model	Qitao Xian et al., 2020
East Lake Region	Lake Wuli-Winter	120.25	31.52	15.8	8.6	2.1	5.22	0.1	14.38	1100				2000-2015	Pelagic zone	bulk diffusion model	Qitao Xian et al., 2020
East Lake Region	Laojianghe	113	29.55	17	18.4	4.9	1.07	0.08	8.68	33.88	43.26			2003-2004	Pelagic zone	CH4 and CO2 flux by modeling	Xing, 2007
East Lake Region	Liangzi	114.5	30.1833	17.3	304	4.2	0.58	0.04	29.7	-564.72				1996-1998	Pelagic zone	Diffusion modeling	Liu and Zhang, 2000
East Lake Region	Liangzi Lake	114.5	30.1833	17.3	304	3	1.2	0.04	29.7	-434.4		26.856		2018.8-2018.9		floating static chamber	Yiwen Zhou et al., 2020
East Lake Region	Libuhu	115.583	28.4167							362.4				Apr.2011	Pelagic zone	Diffusion modeling	Lai et al., 2012
East Lake Region	Libuhu	115.583	28.4167							-240				Oct. 2011	Pelagic zone	Diffusion modeling	Lai et al., 2012
East Lake Region	Longgan	115.8	29.9667	17.2	316.2	2.1	0.52	0.03	1.15	195.36	13.32			2003-2004	Pelagic zone	CH4 and CO2 flux by modeling	Xing, 2007
East Lake Region	Longgan	115.783	29.9667	17.2	316	3.8	0.79	0.077	1.15	-463.44				1996-1998	Pelagic zone	Diffusion modeling	Liu and Zhang, 2000
East Lake Region	Longgan Lake	115.783	29.9667	17.2	316	3.7	1.4	0.08	27.4	1791.67		57.36		2018.8-2018.9		floating static chamber	Yiwen Zhou et al., 2020
East Lake Region	Longyang	114.167	30.55	17.1	1.4	1.5	8.67	0.96	110.8	3190	12.84			2003-2004	Pelagic zone	CH4 and CO2 flux by modeling	Xing, 2007
East Lake Region	Matahu	118.071	37.0808		124	1.5	12.624	0.977	85.51	263.482				Apr. 2008	Pelagic zone	Diffusion modeling	Sun et al., 2010
East Lake Region	Matahu	118.071	37.0808		124	1.5	4.622	0.345	125.38	1853.82				Aug. 2008	Pelagic zone	Diffusion modeling	Sun et al., 2010
East Lake Region	Matahu	118.071	37.0808		124	1.5	1.68	0.094	14.14	1059.74				Oct. 2008	Pelagic zone	Diffusion modeling	Sun et al., 2010
East Lake Region	Matahu	118.071	37.0808		124	1.5	3.239	0.398	9.99	327.187				Dec. 2008	Pelagic zone	Diffusion modeling	Sun et al., 2010
East Lake Region	Moshui	114.234	30.5482		2.7	2.7	5.26	1.45	139.09	2218.48	20.34			2003-2004	Pelagic zone	CH4 and CO2 flux by modeling	Xing, 2007
East Lake Region	Nanhu	114.333	30.5	17.3	8	2.4	3.83	0.33	50.62	-78.76	14.46			2003-2004	Pelagic zone	CH4 and CO2 flux by modeling	Xing, 2007
East Lake Region	Nanjishan (Lake Poyang)	116.3	29.0833	17.7	2933	6.8	1.11225	0.0710833	1.167	421.44		2.64	0.22968	2010-2011	Pelagic zone	Floating static chambers with GC	Lin, 2012
East Lake Region	Nanshi	116.933	34.8833		1098					148.262		0.62208	0.0961805		Pelagic zone	Floating static chambers with GC	Liu et al., 2013
East Lake Region	Nantaizi Lake	114.21	30.4949	17.1	2.78	2	3.6	0.39	88.4	528.816		4820.64		2018.8-2018.9		floating static chamber	Yiwen Zhou et al., 2020
East Lake Region	Niushan	114.533	30.2333	17.3	38.2	3.9	0.66	0.04	3.78	1546.16	22.1			2003-2004	Pelagic zone	CH4 and CO2 flux by modeling	Xing, 2007
East Lake Region	Niushan	114.533	30.2333	17.3	42	7.4				-501.12				1996-1998	Pelagic zone	Diffusion modeling	Liu and Zhang, 2000
East Lake Region	Poyang	116.3	29.0833	17.7	2933	6.8	1.14288	0.054907	2.43657	722.304		19.3536	0.505613	2013	Pelagic zone	Floating static chambers with GC	Liu et al., 2013
East Lake Region	Poyang	116.3	29.0833	17.7	2933	6.8	1.14288	0.054907	2.43657	1064.45		5.94432	0.156246	2013	Pelagic zone	Floating static chambers with GC	Liu et al., 2013
East Lake Region	Poyang	115.967	29.2667	17.7	3583.7	2.5	1.21	0.02	2.17	1939.96	13.85			2003-2004	Pelagic zone	CH4 and CO2 flux by modeling	Xing, 2007
East Lake Region	Poyang Lake	116.373	28.9494	17.7	2398.32	5.1	1	0.13	13.3	758.4		220.584		2018.8-2018.9		floating static chamber	Yiwen Zhou et al., 2020
East Lake Region	Poyang Lake	116.267	29.058	17.7	2398.32	5.1	1.03771	0.0726471	3.10882	874.368		4.1472	0.418	2010.10.		floating chamber method	Lixiang Liu et al., 2016
East Lake Region	Poyanghu	116.3	29.0833	17.7	2933	6.8				41.28				Aug.	Pelagic zone	Diffusion modeling	Ai et al., 2013
East Lake Region	Poyanghu	116.3	29.0833	17.7	2933	6.8				-234.72				Aug. 2007	Pelagic zone	Diffusion modeling	Zhai et al., 2012
East Lake Region	Poyanghu	116.3	29.0833	17.7	2933	6.8				318.48				Dec. 2007	Pelagic zone	Diffusion modeling	Zhai et al., 2012
East Lake Region	Poyanghu	116.3	29.0833	17.7	2933	6.8				683.52				1996-1998	Pelagic zone	Diffusion modeling	Liu and Zhang, 2000
East Lake Region	Qianhu	115.717	28.5833							926.4				Apr.2011	Pelagic zone	Diffusion modeling	Lai et al., 2012
East Lake Region	Qianhu	115.717	28.5833							1420.8				Apr.2011	Pelagic zone	Diffusion modeling	Lai et al., 2012
East Lake Region	Qianhu	115.717	28.5833							-156				Oct. 2011	Pelagic zone	Diffusion modeling	Lai et al., 2012
East Lake Region	Qianhu	115.717	28.5833							-21.6				Oct. 2011	Pelagic zone	Diffusion modeling	Lai et al., 2012
East Lake Region	Qiaodun	114.683	30.25	17.2	8	2.6	0.59	0.04	5.94	366.08	60.95			2003-2004	Pelagic zone	CH4 and CO2 flux by modeling	Xing, 2007
East Lake Region	Qihu	114.633	30.6	17.3	1	1.3	1.31	0.08	9.37	8140.44	5.77999			2003-2004	Pelagic zone	CH4 and CO2 flux by modeling	Xing, 2007
East Lake Region	Qingling	114.241	30.4222	17.2	2.1	1.3	2.51	0.23	83.16	-109.12	15.2			2003-2004	Pelagic zone	CH4 and CO2 flux by modeling	Xing, 2007
East Lake Region	Qingshanhu	116.15	29.0833	17.7	2398.32	6.8				825.6				Apr.2011	Pelagic zone	Diffusion modeling	Lai et al., 2012
East Lake Region	Qingshanhu	116.15	29.0833	17.7	2398.32	6.8				199.2				Apr.2011	Pelagic zone	Diffusion modeling	Lai et al., 2012
East Lake Region	Qingshanhu	116.15	29.0833	17.7	2398.32	6.8				1070.4				Apr.2011	Pelagic zone	Diffusion modeling	Lai et al., 2012
East Lake Region	Qingshanhu	116.15	29.0833	17.7	2398.32	6.8				-12				Oct. 2011	Pelagic zone	Diffusion modeling	Lai et al., 2012
East Lake Region	Qingshanhu	116.15	29.0833	17.7	2398.32	6.8				-216				Oct. 2011	Pelagic zone	Diffusion modeling	Lai et al., 2012
East Lake Region	Qingshanhu	116.15	29.0833	17.7	2398.32	6.8				-31.2				Oct. 2011	Pelagic zone	Diffusion modeling	Lai et al., 2012
East Lake Region	Sanjiao	114.15	30.5167	17.1	2.5	1.5	8.23	0.33	47.41	183.04	6.19999			2003-2004	Pelagic zone	CH4 and CO2 flux by modeling	Xing, 2007
East Lake Region	Sanliqi	114.95	30.0833	17.2	2.7	2	2.57	0.18	37.2	1155.88	6.79001			2003-2004	Pelagic zone	CH4 and CO2 flux by modeling	Xing, 2007
East Lake Region	shallow lakes-Eutrophic (50-60)-Summer						1.2	0.2	15.6	148.8			0.168	夏季		floating static chamber	Yiwen Zhou et al., 2021, 2020
East Lake Region	shallow lakes-Hyper-eutrophic (≥70)-Summer						3.4	0.3	92.7	3128.4			0.938	夏季		floating static chamber	Yiwen Zhou et al., 2021, 2020
East Lake Region	shallow lakes-Mesotrophic (≤50)-Summer						0.6	0.1	7.1	105.6			-0.014	夏季		floating static chamber	Yiwen Zhou et al., 2021, 2020
East Lake Region	shallow lakes-Middle-eutrophic (60-70)-Summer						1.4	0.2	41.9	880.8			0.178	夏季		floating static chamber	Yiwen Zhou et al., 2021, 2020
East Lake Region	Shijiu	118.883	31.5	16	210.4	2.3	0.69	0.07	5.91	735.24	5.26999			2003-2004	Pelagic zone	CH4 and CO2 flux by modeling	Xing, 2007
East Lake Region	Site 1 with algae	114.717	30.1833	15.8	3.33	2.19	1.03	0.03	18	1867.2		14.88		Apr. 2003 to Mar. 2004	Pelagic zone	Floating static chambers with GC	Xing, 2004; Xing et al., 2006
East Lake Region	Site 2 with transition	114.717	30.1833	15.8	3.33	2.08	1.16	0.03	22	1252.8		16.8		Apr. 2003 to Mar. 2004	Pelagic zone	Floating static chambers with GC	Xing, 2004; Xing et al., 2006
East Lake Region	Site 3 with macrophytes	114.717	30.1833	15.8	3.33	1.9	1.1	0.04	21	86.4		31.44		Apr. 2003 to Mar. 2004	Pelagic zone	Floating static chambers with GC	Xing, 2004; Xing et al., 2006
East Lake Region	Poyang	116.3	29.0833	17.7	2933	6.8					15.024			Jan. 2008	Pelagic zone	GC with modeling	Zhao et al., 2011
East Lake Region	Poyang	116.3	29.0833	17.7	2933	6.8					9.312			Sep. 2008	Pelagic zone	GC with modeling	Zhao et al., 2011
East Lake Region	Dongtinghu	112.483	29.1667	17.4	2432	1.3					3.672			Jan. 2008	Pelagic zone	GC with modeling	Zhao et al., 2011
East Lake Region	South Dongting	112.783	28.75	17.4	917.1	2.5	0.65	0.02	2.87	1419.88	13.28			2003-2004	Pelagic zone	CH4 and CO2 flux by modeling	Xing, 2007
East Lake Region	Taihu	120.25	31.25	15.8	2338	2.1	5.02	0.17		5719.2				Dec. 2008	Pelagic zone	Diffusion modeling	Ye et al., 2010
East Lake Region	Taihu (Dongtaihu)	120.25	31.25	15.8	2338	2.2				1102.46		4.00896			Pelagic zone	Floating static chambers with GC	Liu et al., 2013
East Lake Region	Taihu (Meiliang Bay)	120.25	31.25	15.8	2338	2.2				1558.66		8.84736	0.0718502		Pelagic zone	Floating static chambers with GC	Liu et al., 2013
East Lake Region	Taihu Lake	120.145	31.4093	15.8	2329.14	1.9	3.2	0.32	96.6	2221.82		1791.36		2018.8-2018.9		floating static chamber	Yiwen Zhou et al., 2020
East Lake Region	Taihu-Hydrophytes	120.25	31.25	15.8	659.3	1.9				-25.44				Jan. to Dec. 1998	Pelagic zone	Diffusion modeling	Fan et al., 2005
East Lake Region	Taihu-Meiliang Bay	120.25	31.25	15.8	117	1.9				201.6				Jan. to Dec. 1998	Pelagic zone	Diffusion modeling	Fan et al., 2005
East Lake Region	Taihu-Meiliang Bay	120.25	31.25	15.8	2338	2.2			25.7	87.6				Jan. to Dec. 1998	Pelagic zone	Diffusion modeling	Fan et al., 2003
East Lake Region	Taihu-Open lake	120.25	31.25	15.8	1216.8	1.9				232.8				Jan. to Dec. 1998	Pelagic zone	Diffusion modeling	Fan et al., 2005
East Lake Region	Taihu-Open lake	120.25	31.25	15.8	2338	2.2			7.8	97.68				Jan. to Dec. 1998	Pelagic zone	Diffusion modeling	Fan et al., 2003
East Lake Region	Taihu-Riverine mouths	120.25	31.25	15.8	15	1.9				3607.2				Jan. to Dec. 1998	Pelagic zone	Diffusion modeling	Fan et al., 2005
East Lake Region	Taihu-Riverine mouths	120.25	31.25	15.8	2338	2.2			19.5	1495.92				Jan. to Dec. 1998	Pelagic zone	Diffusion modeling	Fan et al., 2003
East Lake Region	Taihu-West littoral zone	120.25	31.25	15.8	324.7	1.9				1288.8				Jan. to Dec. 1998	Littoral zone	Diffusion modeling	Fan et al., 2005
East Lake Region	Taihu-Wuli Lake	120.25	31.25	15.8	5.3	1.9				3163.2				Jan. to Dec. 1998	Pelagic zone	Diffusion modeling	Fan et al., 2005
East Lake Region	Taihu-Wuli Lake	120.25	31.25	15.8	2338	2.2			40	1201.2				Jan. to Dec. 1998	Pelagic zone	Diffusion modeling	Fan et al., 2003
East Lake Region	Tangxun	115	31.1667		47					-366.96				1996-1998	Pelagic zone	Diffusion modeling	Liu and Zhang, 2000
East Lake Region	Taojiada	114.611	30.6564		1.5	1.7	0.79	0.07	5.8	2647.04	13.52			2003-2004	Pelagic zone	CH4 and CO2 flux by modeling	Xing, 2007
East Lake Region	Tianezhou	112.55	29.8333	16.8	14.5	7.6	0.7	0.02	3.32	1122.88	52.79			2003-2004	Pelagic zone	CH4 and CO2 flux by modeling	Xing, 2007
East Lake Region	West Dongting	112.167	28.8333	17.4	520.5	4.8	0.74	0.1	1.7	308.44	50.65			2003-2004	Pelagic zone	CH4 and CO2 flux by modeling	Xing, 2007
East Lake Region	Wuchang	116.733	30.2833	17	100.5	2.1	0.48	0.06	5.76	189.64	17.6			2003-2004	Pelagic zone	CH4 and CO2 flux by modeling	Xing, 2007
East Lake Region	Wucheng (Lake Poyang)	116.3	29.0833	17.7	2933	6.8	0.9525	0.0455	2.48583	290.16		3.12	0.1344	2010-2011	Pelagic zone	Floating static chambers with GC	Lin, 2012
East Lake Region	Xianghu	115.833	28.75							7125.6				Apr.2011	Pelagic zone	Diffusion modeling	Lai et al., 2012
East Lake Region	Xianghu	115.833	28.75							7387.2				Apr.2011	Pelagic zone	Diffusion modeling	Lai et al., 2012
East Lake Region	Xianghu	115.833	28.75							1468.8				Oct. 2011	Pelagic zone	Diffusion modeling	Lai et al., 2012
East Lake Region	Xianghu	115.833	28.75							2570.4				Oct. 2011	Pelagic zone	Diffusion modeling	Lai et al., 2012
East Lake Region	Xingzi (Lake Poyang)	116.3	29.0833	17.7	2933	6.8	0.950833	0.0528333	2.60583	371.04		3.84	0.19776	2010-2011	Pelagic zone	Floating static chambers with GC	Lin, 2012
East Lake Region	Yangcheng	120.817	31.4167	15.4	119.1	1.6	0.63	0.09	13.18	1492.92	13.78			2003-2004	Pelagic zone	CH4 and CO2 flux by modeling	Xing, 2007
East Lake Region	Yaohu	116.15	28.85							6417.6				Apr.2011	Pelagic zone	Diffusion modeling	Lai et al., 2012
East Lake Region	10 lakes in Beijing	116.533	40.1667		9.74	1.629	2.159	0.087				98.52		Jul. Oct 2008, Apr. 2009	Pelagic zone	Floating static chambers with GC	Ai, 2009
East Lake Region	Honglingjin	116.033	40		0.22	1.71	1.3	0.13				125.616		Jul. 2008-Oct. 2009	Pelagic zone	Floating static chambers with GC	Ai, 2009
East Lake Region	shichahai	116.392	39.9486		1.5	1.67	2.06	0.06				60.696		Jul. 2008-Oct. 2009	Pelagic zone	Floating static chambers with GC	Ai, 2009
East Lake Region	longtanhu	116.447	39.8843		0.37	1.55	2.62	0.1				51.36		Jul. 2008-Oct. 2009	Pelagic zone	Floating static chambers with GC	Ai, 2009
East Lake Region	kunminghu	116.278	39.9999		2.13	1.4	1.08	0.04				37.08		Jul. 2008-Oct. 2009	Pelagic zone	Floating static chambers with GC	Ai, 2009
East Lake Region	Lake Baiyangdian (Monthy)	116.033	38.85	12.8	366	2							3.1225	Apr.-Sep. 2007	pelagic	Floating static chambers with GC	Wan et al., 2008
East Lake Region	Lake Baiyangdian (Monthy)	116.033	38.85	12.8	366	2							0.215917	Apr.-Sep. 2007	pelagic	Floating static chambers with GC	Wan et al., 2008
East Lake Region	Lake Baiyangdian (Monthy)	116.033	38.85	12.8	366	2							-0.307267	Apr.-Sep. 2007	pelagic	Floating static chambers with GC	Wan et al., 2008
East Lake Region	Lake Baiyangdian (Monthy)	116.033	38.85	12.8	366	2							1.02976	Apr.-Sep. 2007	pelagic	Floating static chambers with GC	Wan et al., 2008
East Lake Region	Lake Baiyangdian (Monthy)	116.033	38.85	12.8	366	2							0.913495	Apr.-Sep. 2007	pelagic	Floating static chambers with GC	Wan et al., 2008
East Lake Region	Lake Baiyangdian (Monthy)	116.033	38.85	12.8	366	2							-1.96401	Apr.-Sep. 2007	pelagic	Floating static chambers with GC	Wan et al., 2008
East Lake Region	Lake Baiyangdian (Monthy)	116.033	38.85	12.8	366	2							1.78547	Apr.-Sep. 2007	littoral	Floating static chambers with GC	Wan et al., 2008
East Lake Region	Lake Baiyangdian (Monthy)	116.033	38.85	12.8	366	2							0.099654	Apr.-Sep. 2007	littoral	Floating static chambers with GC	Wan et al., 2008
East Lake Region	Lake Baiyangdian (Monthy)	116.033	38.85	12.8	366	2							1.29135	Apr.-Sep. 2007	littoral	Floating static chambers with GC	Wan et al., 2008
East Lake Region	Lake Baiyangdian (Monthy)	116.033	38.85	12.8	366	2							3.06437	Apr.-Sep. 2007	littoral	Floating static chambers with GC	Wan et al., 2008
East Lake Region	Lake Baiyangdian (Monthy)	116.033	38.85	12.8	366	2							4.86643	Apr.-Sep. 2007	littoral	Floating static chambers with GC	Wan et al., 2008
East Lake Region	Lake Baiyangdian (Monthy)	116.033	38.85	12.8	366	2							1.78547	Apr.-Sep. 2007	littoral	Floating static chambers with GC	Wan et al., 2008
East Lake Region	Lake Baiyangdian (Monthy)	116.033	38.85	12.8	6.26	1.2						23.04		2008-2009 monthly sampling	pelagic	Floating static chambers with GC	Wang et al., 2014
East Lake Region	Lake Baiyangdian (Jul.)	116.033	38.85	12.8	366	2	6.35	0.74	1.955				1.2	Jul.-Nov. 2010	pelagic	Floating static chambers with GC	Ynag et al., 2012
East Lake Region	Lake Baiyangdian (Aug.)	116.033	38.85	12.8	366	2	3.558	0.172625	4.01875				1.27992	Jul.-Nov. 2010	pelagic	Floating static chambers with GC	Ynag et al., 2012
East Lake Region	Lake Baiyangdian (Sep.)	116.033	38.85	12.8	366	2	6.1225	0.131625	3.715				1.17	Jul.-Nov. 2010	pelagic	Floating static chambers with GC	Ynag et al., 2012
East Lake Region	Lake Baiyangdian (Oct.)	116.033	38.85	12.8	366	2	5.04525	0.149125	2.98375				1.11	Jul.-Nov. 2010	pelagic	Floating static chambers with GC	Ynag et al., 2012
East Lake Region	Lake Baiyangdian (Nov)	116.033	38.85	12.8	366	2	5.2675	0.167625	2.95625				1.02	Jul.-Nov. 2010	pelagic	Floating static chambers with GC	Ynag et al., 2012
East Lake Region	Lagoon Bamenwan	110.833	19.55									8.4		Mar-Apr 2009	pelagic	Floating static chambers with GC	Han, 2012
East Lake Region	Lagoon Bo'ao	110.55	19.1									6.96		Mar-Apr 2009	pelagic	Floating static chambers with GC	Han, 2012
East Lake Region	Lagoon Xiaohai	110.55	18.85		43							0.48		Mar-Apr 2009	pelagic	Floating static chambers with GC	Han, 2012
East Lake Region	Lagoon Laoyehai	110.4	18.7	25.4	6.6	7.8						20.64		Mar-Apr 2009	pelagic	Floating static chambers with GC	Han, 2012
East Lake Region	Lagoon Bamenwan	110.833	19.55									4.08	1.1748	Jul-Sep. 2008	pelagic	Chambers with GC	Zhao, 2009
East Lake Region	Lagoon Bo'ao	110.55	19.1									3.12	0.37848	Jul-Sep. 2008	pelagic	Chambers with GC	Zhao, 2009
East Lake Region	Lagoon Xiaohai	110.55	18.85									1.44	0.1716	Jul-Sep. 2008	pelagic	Chambers with GC	Zhao, 2009
East Lake Region	Lagoon Laoyehai	110.4	18.7	25.4	2.7	7.8						6.48	0.6864	Jul-Sep. 2008	pelagic	Chambers with GC	Zhao, 2009
East Lake Region	Lake Taihu (spatial)	120.25	31.25	15.8	2338	1.89	3.18	0.2	13.6875			15.6		Jun. and Sep., 2010	Pelagic	Floating static chambers with GC	Zhu DL, 2012
East Lake Region	Lake Taihu (spatial)	120.25	31.25	15.8	2338	1.89	2.67	0.21	13.6875			40.32		Jun. and Sep., 2010	Pelagic	Floating static chambers with GC	Zhu DL, 2012
East Lake Region	Lake Taihu (spatial)	120.25	31.25	15.8	2338	1.89	2.41	0.18	13.6875			-0.48		Jun. and Sep., 2010	Pelagic	Floating static chambers with GC	Zhu DL, 2012
East Lake Region	Lake Taihu (spatial)	120.25	31.25	15.8	2338	1.89	3.49	0.1	13.6875			37.68		Jun. and Sep., 2010	Pelagic	Floating static chambers with GC	Zhu DL, 2012
East Lake Region	Lake Taihu (spatial)	120.25	31.25	15.8	2338	1.89	3.42	0.1	13.6875			47.52		Jun. and Sep., 2010	Pelagic	Floating static chambers with GC	Zhu DL, 2012
East Lake Region	Lake Taihu (spatial)	120.25	31.25	15.8	2338	1.89	3.45	0.12	13.6875			30.48		Jun. and Sep., 2010	Pelagic	Floating static chambers with GC	Zhu DL, 2012
East Lake Region	Lake Taihu (spatial)	120.25	31.25	15.8	2338	1.89	3.68	0.1	13.6875			71.52		Jun. and Sep., 2010	Pelagic	Floating static chambers with GC	Zhu DL, 2012
East Lake Region	Xuanwuhu (spatial)	118.804	32.0785	15.6	3.7	2	2.73	0.14	18.5875			36.96		Jun., Sep., Dec, 2010 and Mar. 2011	Pelagic	Floating static chambers with GC	Zhu DL, 2012
East Lake Region	Xuanwuhu (spatial)	118.804	32.0785	15.6	3.7	2	2.64	0.13	18.5875			29.52		Jun., Sep., Dec, 2010 and Mar. 2011	Pelagic	Floating static chambers with GC	Zhu DL, 2012
East Lake Region	Xuanwuhu (spatial)	118.804	32.0785	15.6	3.7	2	1.81	0.12	18.5875			33.84		Jun., Sep., Dec, 2010 and Mar. 2011	Pelagic	Floating static chambers with GC	Zhu DL, 2012
East Lake Region	Xuanwuhu (spatial)	118.804	32.0785	15.6	3.7	2	2.52	0.09	18.5875			40.56		Jun., Sep., Dec, 2010 and Mar. 2011	Pelagic	Floating static chambers with GC	Zhu DL, 2012
East Lake Region	Xuanwuhu (spatial)	118.804	32.0785	15.6	3.7	2	2.54	0.5	18.5875			13.92		Jun., Sep., Dec, 2010 and Mar. 2011	Pelagic	Floating static chambers with GC	Zhu DL, 2012
East Lake Region	Yaohu	116.15	28.85							3412.8				Apr.2011	Pelagic zone	Diffusion modeling	Lai et al., 2012
East Lake Region	Yaohu	116.15	28.85							1000.8				Oct. 2011	Pelagic zone	Diffusion modeling	Lai et al., 2012
East Lake Region	Yaohu	116.15	28.85							2013.6				Oct. 2011	Pelagic zone	Diffusion modeling	Lai et al., 2012
East Lake Region	Zhangdu	114.683	30.65	17.2	41.1	1.7	1	0.05	3.95	1789.48	32.71			2003-2004	Pelagic zone	CH4 and CO2 flux by modeling	Xing, 2007
East Lake Region	Lake Poyang	116.283	29	17.7	2398.32	6.8	1.16431	0.0628088	2.50721			106.2		Oct. 2010-Jun. 2011	Littoral	Floating static chambers with GC	Zhu LL. 2013
East Lake Region	Lake Poyang	116.317	28.8833	17.9	2.74	1.1	1.095	0.0478	2.23				0.036	Apr 2009-Jun.2011	Littoral	Floating static chambers with GC	Rao B, 2014
East Lake Region	Lake Poyang	116.317	28.8833	17.9	2.74	1.1	1.095	0.0478	2.23				1.956	Apr 2009-Jun.2011	Littoral	Floating static chambers with GC	Rao B, 2014
East Lake Region	Lake Poyang	116.317	28.8833	17.9	2.74	1.1	1.095	0.0478	2.23				-0.00984	Apr 2009-Jun.2011	Pelagic	Floating static chambers with GC	Rao B, 2014
East Lake Region	Lake Poyang (Spring)	116.283	29	17.7	2398.32	6.8	1.01	0.05	2.01				1.80576	Apr., Jul., Oct., 2014; Jan., 2015	Pelagic	Floating static chambers with GC	Xu HX etal., 2016
East Lake Region	Lake Poyang (Summer)	116.283	29	17.7	2398.32	6.8	0.1	0.06	3.09				0.67584	Apr., Jul., Oct., 2014; Jan., 2015	Pelagic	Floating static chambers with GC	Xu HX etal., 2016
East Lake Region	Lake Poyang (Autum)	116.283	29	17.7	2398.32	6.8	1.038	0.073	3.11				0.4224	Apr., Jul., Oct., 2014; Jan., 2015	Pelagic	Floating static chambers with GC	Xu HX etal., 2016
East Lake Region	Lake Poyang (Winter)	116.283	29	17.7	2398.32	6.8	1.26	0.051	2.55				0.59136	Apr., Jul., Oct., 2014; Jan., 2015	Pelagic	Floating static chambers with GC	Xu HX etal., 2016
Inner Mongolia-Xinjiang Lake Region	Lake Wuliangsu (North)	108.87	40.99	7	298.5	1.8	2.17	0.0435	3.9				0.127	2015.6-2015.8	密集沉水植物区	modified headspace-equilibrium method	Ming Ni et al., 2022
Inner Mongolia-Xinjiang Lake Region	Lake Wuliangsu (South)	108.82	40.89	7	298.5	1.8	2.17	0.0435	3.65				0.106	2015.6-2015.9	开放水域	modified headspace-equilibrium method	Ming Ni et al., 2022
Inner Mongolia-Xinjiang Lake Region	Aibihu	82.9333	44.9	8.7	522	1.8				3966				Jun. 1987	Pelagic zone	Diffusion modeling	Fan and Zhang, 1992
Inner Mongolia-Xinjiang Lake Region	Lake Wuliangsu	108.883	40.95	7	293	0.7	3.47	0.14	80.1			304.08		Apr. to Oct.2003 and 2004	Littoral zone	Floating static chambers with GC	Duan et al., 2005; Duan et al., 2007
Inner Mongolia-Xinjiang Lake Region	Lake Wuliangsu	108.883	40.95	7	293	0.7	3.47	0.14	80.1			430.32		Apr. to Oct.2003 and 2004	Littoral zone	Floating static chambers with GC	Duan et al., 2005; Duan et al., 2007
Inner Mongolia-Xinjiang Lake Region	Lake Wuliangsu	108.883	40.95	7	293	0.7	3.47	0.14	80.1			459.12		Apr. to Oct.2003 and 2004	Littoral zone	Floating static chambers with GC	Duan et al., 2005; Duan et al., 2007
Inner Mongolia-Xinjiang Lake Region	Lake Wuliangsu	108.883	40.95	7	293	0.7	3.47	0.14	80.1			356.88		Apr. to Oct.2003 and 2004	Littoral zone	Floating static chambers with GC	Duan et al., 2005; Duan et al., 2007
Inner Mongolia-Xinjiang Lake Region	Lake Wuliangsu	108.883	40.95	7	293	0.7	3.47	0.14	35.49			55.68		Apr. to Oct.2003 and 2004	Pelagic zone	Floating static chambers with GC	Duan et al., 2005; Duan et al., 2007
Inner Mongolia-Xinjiang Lake Region	Lake Wuliangsu	108.883	40.95	7	293	0.7	3.47	0.14	35.49			50.16		Apr. to Oct.2003 and 2004	Pelagic zone	Floating static chambers with GC	Duan et al., 2005; Duan et al., 2007
Inner Mongolia-Xinjiang Lake Region	Lake Wuliangsu	108.883	40.95	7	293	0.7	3.47	0.14	35.49			102.24		Apr. to Oct.2003 and 2004	Pelagic zone	Floating static chambers with GC	Duan et al., 2005; Duan et al., 2007
Inner Mongolia-Xinjiang Lake Region	Lake Wuliangsu	108.883	40.95	7	293	0.7	3.47	0.14	35.49			100.8		Apr. to Oct.2003 and 2004	Pelagic zone	Floating static chambers with GC	Duan et al., 2005; Duan et al., 2007
Inner Mongolia-Xinjiang Lake Region	Aibihu	82.9333	44.9	8.7	522	1.8	8.889	0.0905	7.13			268.8		Jul-Aug. 2011	Littoral zone (reed)	Floating static chambers with GC	Sun, 2012
Inner Mongolia-Xinjiang Lake Region	Aibihu	82.9333	44.9	8.7	522	1.8				4363.44				Jun. 1987	Pelagic zone	Diffusion modeling	Fan and Zhang, 1992
Inner Mongolia-Xinjiang Lake Region	Aibihu	82.9333	44.9	8.7	522	1.8	2.0636	0.1212	5.226	2677.2				May. 2014	Pelagic zone	Diffusion modeling	Zhou et al., 2015
Inner Mongolia-Xinjiang Lake Region	Aiding	89.4167	42.6167		124					171.84				Jun. 1958	Pelagic zone	Diffusion modeling	Fan and Zhang, 1991
Inner Mongolia-Xinjiang Lake Region	Aiding	89.4167	42.6167		124					2300.4				2000s	Pelagic zone	Diffusion modeling	Wang and Du, 1997
Inner Mongolia-Xinjiang Lake Region	Ailike	85.7543	45.9081	8.9	15	80				13885.7				Jul. 1980	Pelagic zone	Diffusion modeling	Fan and Zhang, 1992
Inner Mongolia-Xinjiang Lake Region	Aiximan	80.2117	40.5653	9.9	9.3	1.84				6924.72				Jun. 1985	Pelagic zone	Diffusion modeling	Fan and Zhang, 1991
Inner Mongolia-Xinjiang Lake Region	Akekule	84.45	36.6	-3.7	9.4	9.2				1714.56				Jul. 1980	Pelagic zone	Diffusion modeling	Fan and Zhang, 1992
Inner Mongolia-Xinjiang Lake Region	Akesayihu	79.3333	37.2		158					6409.68				Jul.1989	Pelagic zone	Diffusion modeling	Fan and Zhang, 1992
Inner Mongolia-Xinjiang Lake Region	Aletaiyanhu	88.1667	47.1167							18214.6				Jul. 1980	Pelagic zone	Diffusion modeling	Fan and Zhang, 1992
Inner Mongolia-Xinjiang Lake Region	Aqike	88.4167	37.0833	-4.3	345	9.8				8580				Jun. 1984	Pelagic zone	Diffusion modeling	Fan and Zhang, 1992
Inner Mongolia-Xinjiang Lake Region	Ashikule	81.5667	35.7333	-4.6	10.5	4.9				-64.32				2000s	Pelagic zone	Diffusion modeling	Wang and Du, 1998
Inner Mongolia-Xinjiang Lake Region	Ayakekumu	89.3333	37.55	-2.7	570	9.6				3811.2				Jun. 1984	Pelagic zone	Diffusion modeling	Fan and Zhang, 1992
Inner Mongolia-Xinjiang Lake Region	Balikun	92.8012	43.6731		116	0.6				2100.24				2000s	Pelagic zone	Diffusion modeling	Wang and Du, 1998
Inner Mongolia-Xinjiang Lake Region	Bayancuori	115.61	43.94	1.7	10.01	3.3	0.345	3.356	12.48	50.616	10.728			Sep. 2013	Pelagic	Headspace equilibrium method	Siyue Li et al, 2018
Inner Mongolia-Xinjiang Lake Region	Bayankuren	119.483	49.3333				1.581	0.115	2.212	3991.92	7.032			Sep. 2013	Pelagic	Headspace equilibrium method	Siyue Li et al, 2018
Inner Mongolia-Xinjiang Lake Region	Bayinbuluke Tianehu	84.3667	42.8167	-4.25	776.4					938.64		10.08		Jun. -Oct., 2013-2014	Pelagic	Floating static chambers with Licor	Yang, 2015
Inner Mongolia-Xinjiang Lake Region	Bayinbuluke Tianehu	84.3667	42.8167	-4.25	776.4					761.76		1.68		Jun. -Oct., 2013-2014	Littoral	Floating static chambers with Licor	Yang, 2015
Inner Mongolia-Xinjiang Lake Region	Beidachi	107.458	37.9912	8.4	20.3	0.45				6189.6					Pelagic zone	Diffusion modeling	Wang and Du, 1998
Inner Mongolia-Xinjiang Lake Region	Bei'erhu	117.715	47.8136		609	9	1.038	0.077	4.062	836.64	4.872			Sep. 2013	Pelagic	Headspace equilibrium method	Siyue Li et al, 2018
Inner Mongolia-Xinjiang Lake Region	Beihaizi	92.9167	43.7833		12					3149.28				2000s	Pelagic zone	Diffusion modeling	Wang and Du, 1998
Inner Mongolia-Xinjiang Lake Region	Bositeng	86.85	41.8833	10.2	913	9	0.89	0.014		1691.76				Jul. 1986	Pelagic zone	Diffusion modeling	Fan and Zhang, 1992
Inner Mongolia-Xinjiang Lake Region	Buerdun	116.967	49.0833				1.477	4.448	1.664	6889.2	57.504			Sep. 2013	Pelagic	Headspace equilibrium method	Siyue Li et al, 2018
Inner Mongolia-Xinjiang Lake Region	Bulunkouhu	75	38.6667		7	30				738.72				Jun. 1988	Pelagic zone	Diffusion modeling	Fan and Zhang, 1992
Inner Mongolia-Xinjiang Lake Region	Buluntuo	87.3	47.2167	5.9	730	8				842.64				Jul. 1987	Pelagic zone	Diffusion modeling	Fan and Zhang, 1992
Inner Mongolia-Xinjiang Lake Region	Buluntuo	87.3	47.2167	5.9	730	8				2043.12				Jul. 1987	Pelagic zone	Diffusion modeling	Fan and Zhang, 1992
Inner Mongolia-Xinjiang Lake Region	Caiwopu	87.9	43.5	6.5	64	5				165.6				Apr. 1990	Pelagic zone	Diffusion modeling	Fan and Zhang, 1992
Inner Mongolia-Xinjiang Lake Region	Chaganchulu	116.933	49.1333				0.471	1.391	8.263	7630.42	8.208			Sep. 2013	Pelagic	Headspace equilibrium method	Siyue Li et al, 2018
Inner Mongolia-Xinjiang Lake Region	Chaganlimennuo'er	112.917	43.2333		21					-429.84					Pelagic zone	Diffusion modeling	Wang and Du, 1998
Inner Mongolia-Xinjiang Lake Region	Chaiwobaohu	87.9	43.5	6.5	30	4.2				1164.96				2000s	Pelagic zone	Diffusion modeling	Wang and Du, 1998
Inner Mongolia-Xinjiang Lake Region	Changannuo'er	114.917	43.9167		109.3					1969.92					Pelagic zone	Diffusion modeling	Wang and Du, 1998
Inner Mongolia-Xinjiang Lake Region	Dabanchengxiyanhu	89.1667	43.1167		11					1148.88				May. 1990	Pelagic zone	Diffusion modeling	Fan and Zhang, 1992
Inner Mongolia-Xinjiang Lake Region	Dabangchendongyanhu	88.1333	43.3833	6.7	35.1	0.46				569.28				2000s	Pelagic zone	Diffusion modeling	Wang and Du, 1998
Inner Mongolia-Xinjiang Lake Region	Daihai	112.7	40.5831	5.6	160	7.4				223.92				Jul. 2008	Pelagic zone	Diffusion modeling	Wang and Du, 1998
Inner Mongolia-Xinjiang Lake Region	Daihai	112.7	40.5831	5.6	160	7.4				3657.12				Jul. 2008	Pelagic zone	Diffusion modeling	Zhang, 2009
Inner Mongolia-Xinjiang Lake Region	Daihai	112.7	40.5831	5.6	160	7.4	1.658	0.092	3.22	1196.16				Jul. 2008	Pelagic zone	Diffusion modeling	Zhang, 2009
Inner Mongolia-Xinjiang Lake Region	Daihai	112.7	40.5831	5.6	160	7.4				5958.48				Jul. 2008	Pelagic zone	Diffusion modeling	Zhang, 2009
Inner Mongolia-Xinjiang Lake Region	Daihai	112.7	40.5831	5.6	160	7.4	1.658	0.092	3.22	8429.52				Jul. 2008	Pelagic zone	Diffusion modeling	Zhang, 2009
Inner Mongolia-Xinjiang Lake Region	Daihai	112.7	40.5831	5.6	160	7.4				1059.84				Jul. 2008	Pelagic zone	Diffusion modeling	Zhang, 2009
Inner Mongolia-Xinjiang Lake Region	Daihai	112.7	40.5831	5.6	160	7.4				1844.88				Jul. 2008	Pelagic zone	Diffusion modeling	Zhang, 2009
Inner Mongolia-Xinjiang Lake Region	Daihai	112.7	40.5831	5.6	160	7.4				3747.84				Jul. 2008	Pelagic zone	Diffusion modeling	Zhang, 2009
Inner Mongolia-Xinjiang Lake Region	Daihai	112.7	40.5831	5.6	160	7.4				3338.16				Jul. 2008	Pelagic zone	Diffusion modeling	Zhang, 2009
Inner Mongolia-Xinjiang Lake Region	Daihai	112.7	40.5831	5.6	160	7.4				2475.84				Jul. 2008	Pelagic zone	Diffusion modeling	Zhang, 2009
Inner Mongolia-Xinjiang Lake Region	Daihai	112.7	40.5831	5.6	160	7.4				432.72				Jul. 2008	Pelagic zone	Diffusion modeling	Zhang, 2009
Inner Mongolia-Xinjiang Lake Region	Daihai	112.7	40.5831	5.6	160	7.4				-193.92				Jul. 2008	Pelagic zone	Diffusion modeling	Zhang, 2009
Inner Mongolia-Xinjiang Lake Region	Daihai	112.7	40.5831	5.6	160	7.4				336.48				Jul. 2008	Pelagic zone	Diffusion modeling	Zhang, 2009
Inner Mongolia-Xinjiang Lake Region	Daihai	112.7	40.5831	5.6	160	7.4				-151.2				Jul. 2008	Pelagic zone	Diffusion modeling	Zhang, 2009
Inner Mongolia-Xinjiang Lake Region	Daihai	112.7	40.5831	5.6	160	7.4				531.36				Jul. 2008	Pelagic zone	Diffusion modeling	Zhang, 2009
Inner Mongolia-Xinjiang Lake Region	Daihai	112.7	40.5831	5.6	160	7.4				339.12				Jul. 2008	Pelagic zone	Diffusion modeling	Zhang, 2009
Inner Mongolia-Xinjiang Lake Region	Daihai	112.7	40.5831	5.6	160	7.4	1.658	0.092	3.22	-634.08				Jul. 2008	Pelagic zone	Diffusion modeling	Zhang, 2009
Inner Mongolia-Xinjiang Lake Region	Daihai	112.7	40.5831	5.6	160	7.4				138.96				Jul. 2008	Pelagic zone	Diffusion modeling	Zhang, 2009
Inner Mongolia-Xinjiang Lake Region	Daihai	112.7	40.5831	5.6	160	7.4				-321.12				Jul. 2008	Pelagic zone	Diffusion modeling	Zhang, 2009
Inner Mongolia-Xinjiang Lake Region	Daihai	112.7	40.5831	5.6	160	7.4				-369.36				Jul. 2008	Pelagic zone	Diffusion modeling	Zhang, 2009
Inner Mongolia-Xinjiang Lake Region	Daihai	112.7	40.5831	5.6	160	7.4				115.2				Jul. 2008	Pelagic zone	Diffusion modeling	Zhang, 2009
Inner Mongolia-Xinjiang Lake Region	Daihai	112.7	40.5831	5.6	160	7.4				488.4				Jul. 2008	Pelagic zone	Diffusion modeling	Zhang, 2009
Inner Mongolia-Xinjiang Lake Region	Daihai	112.7	40.5831	5.6	160	7.4				1726.32				Jul. 2008	Pelagic zone	Diffusion modeling	Zhang, 2009
Inner Mongolia-Xinjiang Lake Region	Daihai	112.7	40.5831	5.6	160	7.4				-342.96				Jul. 2008	Pelagic zone	Diffusion modeling	Zhang, 2009
Inner Mongolia-Xinjiang Lake Region	Daihai	112.7	40.5831	5.6	160	7.4				-209.52				Jul. 2008	Pelagic zone	Diffusion modeling	Zhang, 2009
Inner Mongolia-Xinjiang Lake Region	Daihai	112.7	40.5831	5.6	160	7.4				-248.88				Jul. 2008	Pelagic zone	Diffusion modeling	Zhang, 2009
Inner Mongolia-Xinjiang Lake Region	Daihai	112.7	40.5831	5.6	160	7.4				-230.16				Jul. 2008	Pelagic zone	Diffusion modeling	Zhang, 2009
Inner Mongolia-Xinjiang Lake Region	Daihai	112.7	40.5831	5.6	160	7.4				-231.84				Jul. 2008	Pelagic zone	Diffusion modeling	Zhang, 2009
Inner Mongolia-Xinjiang Lake Region	Daihai	112.7	40.5831	5.6	160	7.4				-253.44				Jul. 2008	Pelagic zone	Diffusion modeling	Zhang, 2009
Inner Mongolia-Xinjiang Lake Region	Dalaidongsumu	117.133	49.3833				0.784	1.979	0.785	394.92	0.624			Sep. 2013	Pelagic	Headspace equilibrium method	Siyue Li et al, 2018
Inner Mongolia-Xinjiang Lake Region	Dalainuo'er	116.417	43.25	1.3	220	6.8				-292.8					Pelagic zone	Diffusion modeling	Wang and Du, 1998
Inner Mongolia-Xinjiang Lake Region	Datianchi	88.0833	44.1167		2	8				1304.4				Apr. 1987	Pelagic zone	Diffusion modeling	Fan and Zhang, 1992
Inner Mongolia-Xinjiang Lake Region	Dawusikonghu									906.24				Jul. 1986	Pelagic zone	Diffusion modeling	Fan and Zhang, 1992
Inner Mongolia-Xinjiang Lake Region	Dongchahanco	108.833	39.1833		22					-595.92					Pelagic zone	Diffusion modeling	Wang and Du, 1998
Inner Mongolia-Xinjiang Lake Region	Eedunwula						1.599	0.159	1.921	-374.256	1.728			Sep. 2013	Pelagic	Headspace equilibrium method	Siyue Li et al, 2018
Inner Mongolia-Xinjiang Lake Region	Eji'nuo'er (EjiNur)	116.5	45.2333		26					4918.56					Pelagic zone	Diffusion modeling	Wang and Du, 1998
Inner Mongolia-Xinjiang Lake Region	Gannankule				43					-66				Aug. 1987	Pelagic zone	Diffusion modeling	Fan and Zhang, 1992
Inner Mongolia-Xinjiang Lake Region	Haerluoer	109.87	42.36		7.57		1.824	2.881	0.001	624	3.168			Sep. 2013	Pelagic	Headspace equilibrium method	Siyue Li et al, 2018
Inner Mongolia-Xinjiang Lake Region	Halasi	87.05	48.1333		44.8	120	0.683	0.024		2652.24				Jul. 1987	Pelagic zone	Diffusion modeling	Wang and Du, 1998
Inner Mongolia-Xinjiang Lake Region	Haricuori	118.633	49.8333				3.27	6.845	4.133	2036.64	11.688			Sep. 2013	Pelagic	Headspace equilibrium method	Siyue Li et al, 2018
Inner Mongolia-Xinjiang Lake Region	Harinudun	116.967	48.9833				0.62	1.811	1.185	394.392	1.416			Sep. 2013	Pelagic	Headspace equilibrium method	Siyue Li et al, 2018
Inner Mongolia-Xinjiang Lake Region	HDN						1.066	0.095	4.799	4434.77	9.12			Sep. 2013	Pelagic	Headspace equilibrium method	Siyue Li et al, 2018
Inner Mongolia-Xinjiang Lake Region	Hongjianco	109.883	39.1	7.3	60.3	8.2	3.41	0.019		259.2				1994	Pelagic zone	Diffusion modeling	Wang and Du, 1998
Inner Mongolia-Xinjiang Lake Region	Huamahu	107.4	37.6		3.3	0.25				863.52					Pelagic zone	Diffusion modeling	Wang and Du, 1998
Inner Mongolia-Xinjiang Lake Region	Huangqihai	113.233	40.8333	5.2	72	1.94				-249.84					Pelagic zone	Diffusion modeling	Wang and Du, 1998
Inner Mongolia-Xinjiang Lake Region	Huheluoer	119.033	49.2667				2.021	4.8	6.82	2808.72	8.568			Sep. 2013	Pelagic	Headspace equilibrium method	Siyue Li et al, 2018
Inner Mongolia-Xinjiang Lake Region	Hulun Lake	117.383	48.95	0.001	2339	5.8	1.98	0.105		-253.2				1998	Pelagic zone	Diffusion modeling	Yan et al., 2001
Inner Mongolia-Xinjiang Lake Region	Hulun Lake	117.383	48.95	0.001	2339	5.8	1.98	0.105		532.56				1999	Pelagic zone	Diffusion modeling	Yan et al., 2001
Inner Mongolia-Xinjiang Lake Region	Jilantaiyanhu	105.667	39.65		37.2					14913.6					Pelagic zone	Diffusion modeling	Wang and Du, 1998
Inner Mongolia-Xinjiang Lake Region	jilihu	87.4333	46.9167	6.2	174	9.9				216.96				2000s	Pelagic zone	Diffusion modeling	Wang and Du, 1998
Inner Mongolia-Xinjiang Lake Region	Jilikulehu	87.4333	46.9167	6.2	160	20.9				2644.8				Jul. 1987	Pelagic zone	Diffusion modeling	Fan and Zhang, 1992
Inner Mongolia-Xinjiang Lake Region	jingyu	89.4333	36.3333	-6.1	264	4.1				98.16				2000s	Pelagic zone	Diffusion modeling	Wang and Du, 1998
Inner Mongolia-Xinjiang Lake Region	Kalakulihu	75	38.3333		10					1793.52				Jun. 1988	Pelagic zone	Diffusion modeling	Fan and Zhang, 1992
Inner Mongolia-Xinjiang Lake Region	Kanas	87.061	48.8326	0.7	37.7	120				1153.44				Jul. 1980	Pelagic zone	Diffusion modeling	Fan and Zhang, 1992
Inner Mongolia-Xinjiang Lake Region	Kekesuyanhu	87.5333	47.6667		12					1109.04				2000s	Pelagic zone	Diffusion modeling	Wang and Du, 1998
Inner Mongolia-Xinjiang Lake Region	Keqikekumukule	90.7333	36.1		30					3258				Aug. 1988	Pelagic zone	Diffusion modeling	Fan and Zhang, 1992
Inner Mongolia-Xinjiang Lake Region	Lake Wuliangsu	108.81	40.95	7	293	0.7	2.29	0.08	15.4	1570.8		94.4		2019.1/4/7/10四季		T-floating chamber；E-bubble traps	Heyang Sun et al., 2021
Inner Mongolia-Xinjiang Lake Region	Lake Wuliangsu	108.883	40.95	7	293	1.1	1.45	0.057	4.64	4135.92					Pelagic zone	Diffusion modeling	Wang and Du, 1998
Inner Mongolia-Xinjiang Lake Region	Manasihu	85.95	45.8	9.1	578	4.5				4554.48				2000s	Pelagic zone	Diffusion modeling	Wang and Du, 1998
Inner Mongolia-Xinjiang Lake Region	Qijiaojingdongyanhu	91.5	43.45		40					3019.2				2000s	Pelagic zone	Diffusion modeling	Wang and Du, 1998
Inner Mongolia-Xinjiang Lake Region	Sabupao	121.467	49.0667				1.126	0.077	0.041	3273.82	3.72			Sep. 2013	Pelagic	Headspace equilibrium method	Siyue Li et al., 2018
Inner Mongolia-Xinjiang Lake Region	Sailimu	81.1667	44.6	0.001	454	46.4	0.81			1950.72				Jun. 1987	Pelagic zone	Diffusion modeling	Fan and Zhang, 1992
Inner Mongolia-Xinjiang Lake Region	Shiyingtannanyanhu	93.9167	41.45		10					3540.96				2000s	Pelagic zone	Diffusion modeling	Wang and Du, 1998
Inner Mongolia-Xinjiang Lake Region	Suolinnuo'er	117.55	45.5	1.2	230	0.85	0.082	0.92		-316.56				1979	Pelagic zone	Diffusion modeling	Wang and Du, 1998
Inner Mongolia-Xinjiang Lake Region	Taitema	90.1667	40.1167		88					1754.88				Oct. 1989	Pelagic zone	Diffusion modeling	Fan and Zhang, 1992
Inner Mongolia-Xinjiang Lake Region	Tianshuihai	79.51	35.74		0.96					143.04				Aug. 1988	Pelagic zone	Diffusion modeling	Fan and Zhang, 1992
Inner Mongolia-Xinjiang Lake Region	Wenxiantianchi	104.754	33.2523		0.88	29.3				2816.64					Pelagic zone	Diffusion modeling	Wang and Du, 1998
Inner Mongolia-Xinjiang Lake Region	Wuluke	81.6333	35.6667	-4.5	15	20				2882.16				Jul. 1988	Pelagic zone	Diffusion modeling	Fan and Zhang, 1992
Inner Mongolia-Xinjiang Lake Region	Wuzunbulake	85.85	42.0667		276					10362.7				2000s	Pelagic zone	Diffusion modeling	Wang and Du, 1998
Inner Mongolia-Xinjiang Lake Region	Xiaotianchi	87.1667	48.1167							1116.48				Apr. 1987	Pelagic zone	Diffusion modeling	Fan and Zhang, 1992
Inner Mongolia-Xinjiang Lake Region	Xunchi	107.517	37.75	8.5	11.4	0.25				1969.92					Pelagic zone	Diffusion modeling	Wang and Du, 1998
Inner Mongolia-Xinjiang Lake Region	yabulaiyanhu	102.833	39.3833		22.6					6189.6					Pelagic zone	Diffusion modeling	Wang and Du, 1998
Inner Mongolia-Xinjiang Lake Region	Yan'gekule				50.8					701.76				Apr. 1981	Pelagic zone	Diffusion modeling	Fan and Zhang, 1992
Inner Mongolia-Xinjiang Lake Region	Yiwuhu	94.2167	43.35	3.5	28	0.9				18840.2				Jun. 1984	Pelagic zone	Diffusion modeling	Fan and Zhang, 1992
Inner Mongolia-Xinjiang Lake Region	Zhongquanziyanhu	102.7	39.25		20					2354.88					Pelagic zone	Diffusion modeling	Wang and Du, 1998
Qinghai-Tibet Lake Region	Beiluhe lakes	92.91	34.82		0.00148		0.79				5.025	14.4		2020.6-2020.9	高山草甸	D-modified headspace-equilibrium method；E、T-floating chamber method	Lei Wang et al., 2021
Qinghai-Tibet Lake Region	Maduo lakes	98.52	34.92		0.01871		1.46				1.875	2.225		2020.6-2020.9	高山草甸	D-modified headspace-equilibrium method；E、T-floating chamber method	Lei Wang et al., 2021
Qinghai-Tibet Lake Region	Tuotuohe lakes	92.33	34.08		0.01545		0.73				0.5	8.525		2020.6-2020.9	高山草原	D-modified headspace-equilibrium method；E、T-floating chamber method	Lei Wang et al., 2021
Qinghai-Tibet Lake Region	Wudaoliang lakes	93.5	35.38		0.01058		0.58				0.235	0.703		2020.6-2020.9	高山荒漠	D-modified headspace-equilibrium method；E、T-floating chamber method	Lei Wang et al., 2021
Qinghai-Tibet Lake Region	Angku Co				25					-207.806				Aug-Sep. 2009	Pelagic zone	Diffusion modeling	Lei et al., 2012
Qinghai-Tibet Lake Region	Angrenjin Co	87.206	29.299	2.8	24.3	17.8		0.005	12.5	1988.8	1.6		0.1496	2015.5	littoral zone	headspace-equilibrium method	Fangping Yan et al., 2018
Qinghai-Tibet Lake Region	Bam Co	90.5833	31.25	-0.5	236.16	18.3	1.26485	0.05835	0.329271	530.074				Aug-Sep. 2009	Pelagic zone	Diffusion modeling	Lei et al., 2012
Qinghai-Tibet Lake Region	Bangkog Co				136.34					834.617				Aug-Sep. 2009	Pelagic zone	Diffusion modeling	Lei et al., 2012
Qinghai-Tibet Lake Region	Baring Co									161.04				Aug-Sep. 2009	Pelagic zone	Diffusion modeling	Lei et al., 2012
Qinghai-Tibet Lake Region	Bong Co	91.15	31.2167	-1.1	141.3	38.3	0.39	0.0393	1.76	-37.5257				Aug-Sep. 2009	Pelagic zone	Diffusion modeling	Lei et al., 2012
Qinghai-Tibet Lake Region	Bujico	85.3589	32.5961		1.1	1.4				-137.588				Jul. and Aug. in 1998-2001	Pelagic zone	Diffusion modeling	Yang et al., 2003
Qinghai-Tibet Lake Region	Cangmu Co	83.5586	32.1199	0.7	87.5	5.8				1016.4	22.24		0.0572	2015.5	littoral zone	headspace-equilibrium method	Fangping Yan et al., 2018
Qinghai-Tibet Lake Region	Chabo Co	84.1861	33.3162		32					136.4	0.48		0.0748	2015.5	littoral zone	headspace-equilibrium method	Fangping Yan et al., 2018
Qinghai-Tibet Lake Region	Chen Co	90.52	28.95	2.9	41.81	36.3				91.08				Aug-Sep. 2009	Pelagic zone	Diffusion modeling	Lei et al., 2012
Qinghai-Tibet Lake Region	Chenco	90.52	28.95	2.9	39.1	20.2				448.607				Jul. and Aug. in 1998-2001	Pelagic zone	Diffusion modeling	Yang et al., 2003
Qinghai-Tibet Lake Region	Cuoer	91.5	31.4667	-0.8	61.3	4.8				2158.9				Jul. and Aug. in 1998-2001	Pelagic zone	Diffusion modeling	Yang et al., 2003
Qinghai-Tibet Lake Region	Cuojia	91.37	31.99	-1.8	20	0.6				6821.71				Jul. and Aug. in 1998-2001	Pelagic zone	Diffusion modeling	Yang et al., 2003
Qinghai-Tibet Lake Region	Cuomorong	92.06	31.62	-1.4	3.6	1.7				-430.659				Jul. and Aug. in 1998-2001	Pelagic zone	Diffusion modeling	Yang et al., 2003
Qinghai-Tibet Lake Region	Cuona 1	91.4833	32.0333	-1.8	182.8	20				-112.751				Jul. and Aug. in 1998-2001	Pelagic zone	Diffusion modeling	Yang et al., 2003
Qinghai-Tibet Lake Region	Cuona 2	91.4558	32.0114	-1.8	1.5	0.5				-408.817				Jul. and Aug. in 1998-2001	Pelagic zone	Diffusion modeling	Yang et al., 2003
Qinghai-Tibet Lake Region	Dagze Co	87.5333	31.9	0.2	269.07	8.5	1.4405	0.1187	0.65296	407.314				Aug-Sep. 2009	Pelagic zone	Diffusion modeling	Lei et al., 2012
Qinghai-Tibet Lake Region	Dajia Co	85.7167	29.85	-2.4	109.45	18.3	1.0398	0.6371	0.5	-29.04				Aug-Sep. 2009	Pelagic zone	Diffusion modeling	Lei et al., 2012
Qinghai-Tibet Lake Region	Dangreyong Co	86.6318	31.2622	0.5	835.3	120	0.7303	0.2578	1	7708.8	0.64		0.33	2015.5	littoral zone	headspace-equilibrium method	Fangping Yan et al., 2018
Qinghai-Tibet Lake Region	Dawa Co	84.975	31.227	-0.2	114.4	11.3	1.3011	0.2133	1.8	4699.2	795.2		0.4268	2015.5	littoral zone	headspace-equilibrium method	Fangping Yan et al., 2018
Qinghai-Tibet Lake Region	Dawa Co	84.9667	31.2333	-0.2	110.55	11.3	1.3011	0.2133	1.8	849.703				Aug-Sep. 2009	Pelagic zone	Diffusion modeling	Lei et al., 2012
Qinghai-Tibet Lake Region	Dogze Co	87.5179	31.8326		244.7					1804	0.32		0.1056	2015.5	littoral zone	headspace-equilibrium method	Fangping Yan et al., 2018
Qinghai-Tibet Lake Region	Dong Co	84.74	32.161	0.3	87.7	2.9	1.7976	0.1023	1.1	2732.4	1.76		0.1408	2015.5	littoral zone	headspace-equilibrium method	Fangping Yan et al., 2018
Qinghai-Tibet Lake Region	Dong Co	84.7333	32.1667	0.3	92.47	11.9	1.9879	0.178433	0.799923	2114.64				Aug-Sep. 2009	Pelagic zone	Diffusion modeling	Lei et al., 2012
Qinghai-Tibet Lake Region	Duoco	88.2747	30.7196	-0.3	44.4	24.5				-164.666				Jul. and Aug. in 1998-2001	Pelagic zone	Diffusion modeling	Yang et al., 2003
Qinghai-Tibet Lake Region	Duoqingco	89.35	28.15	1.4	60	2				61.7851				Jul. and Aug. in 1998-2001	Pelagic zone	Diffusion modeling	Yang et al., 2003
Qinghai-Tibet Lake Region	Elingco	97.6962	34.9101	-2.8	610.7	17.8				-40.0583				Jul. and Aug. in 1998-2001	Pelagic zone	Diffusion modeling	Yang et al., 2003
Qinghai-Tibet Lake Region	Gahai	97.5582	37.136	4.7	47.2	8.7				-336.371				Jul. and Aug. in 1998-2001	Pelagic zone	Diffusion modeling	Yang et al., 2003
Qinghai-Tibet Lake Region	Gahai	97.5582	37.136	4.7	32	7.5				6854				Jul. and Aug. in 1998-2001	Pelagic zone	Diffusion modeling	Yang et al., 2003
Qinghai-Tibet Lake Region	Gahai 1	97.5582	37.136	4.7	2.2	0.4				-301.139				Jul. and Aug. in 1998-2001	Pelagic zone	Diffusion modeling	Yang et al., 2003
Qinghai-Tibet Lake Region	Hangco	91.78	31.31	-0.6	2.7	1.5				-431.699				Jul. and Aug. in 1998-2001	Pelagic zone	Diffusion modeling	Yang et al., 2003
Qinghai-Tibet Lake Region	Lake Medo(Lake Huahu)	102.83	33.9147	1.6	3.29	0.25		0.006			85.44	833.04		2009.5-2009.8		floating chamber method	Dan Zhu et al., 2016
Qinghai-Tibet Lake Region	Lake Medo(Lake Huahu)	102.83	33.9147	1.6	3.29	0.25		0.024	2.5				1.296	2009.5-2009.8	Infralittoral zone	floating chamber method	Dan Zhu et al., 2016
Qinghai-Tibet Lake Region	Lake Medo(Lake Huahu)	102.83	33.9147	1.6	3.29	0.25		0.0135	3				0.216	2009.5-2009.8	Pelagic zone	floating chamber method	Dan Zhu et al., 2016
Qinghai-Tibet Lake Region	Lake Huahu	103.15	33.4167	1.6	3.29	0.25						362.4	6.0336	Jun. to Aug. 2006, 2007	Littoral zone	Floating static chambers with GC	Chen et al., 2009 (CH4); Chen et al., 2011 (N2O)
Qinghai-Tibet Lake Region	G. maxima stand (25%)	103.15	33.4167	1.6	3.29	0.25						1080	8.304	Jun. to Aug. 2006, 2007	Littoral zone	Floating static chambers with GC	Chen et al., 2009 (CH4); Chen et al., 2011 (N2O)
Qinghai-Tibet Lake Region	K. tibetica stand (15%)	103.15	33.4167	1.6	3.29	0.25						14.4	5.28	Jun. to Aug. 2006, 2007	Littoral zone	Floating static chambers with GC	Chen et al., 2009 (CH4); Chen et al., 2011 (N2O)
Qinghai-Tibet Lake Region	H. vulgaris stand (15%)	103.15	33.4167	1.6	3.29	0.25						266.4	6.024	Jun. to Aug. 2006, 2007	Littoral zone	Floating static chambers with GC	Chen et al., 2009 (CH4); Chen et al., 2011 (N2O)
Qinghai-Tibet Lake Region	P. amphibium stand (20%)	103.15	33.4167	1.6	3.29	0.25						117.6	5.28	Jun. to Aug. 2006, 2007	Littoral zone	Floating static chambers with GC	Chen et al., 2009 (CH4); Chen et al., 2011 (N2O)
Qinghai-Tibet Lake Region	Non-vegetated zone (10%)	103.15	33.4167	1.6	3.29	0.25						117.6	2.2632	Jun. to Aug. 2006, 2007	Littoral zone	Floating static chambers with GC	Chen et al., 2009 (CH4); Chen et al., 2011 (N2O)
Qinghai-Tibet Lake Region	C. muliensis stand (15%)	103.15	33.4167	1.6	3.29	0.25						110.4	3.768	Jun. to Aug. 2006, 2007	Littoral zone	Floating static chambers with GC	Chen et al., 2009 (CH4); Chen et al., 2011 (N2O)
Qinghai-Tibet Lake Region	Lake Medo (Lake Huahu)	102.83	33.9147	1.6	3.29	0.24					85.44			May to Aug, 2009	All sites	Chambers with GC--Diffusive flux	Zhu et al., 2016
Qinghai-Tibet Lake Region	Lake Medo (Lake Huahu)	102.83	33.9147	1.6	3.29	0.21					96			May to Aug, 2009	pelagic (Upper site)	Chambers with GC--Diffusive flux	Zhu et al., 2016
Qinghai-Tibet Lake Region	Lake Medo (Lake Huahu)	102.83	33.9147	1.6	3.29	0.26					120			May to Aug, 2009	pelagic (Central site)	Chambers with GC--Diffusive flux	Zhu et al., 2016
Qinghai-Tibet Lake Region	Lake Medo (Lake Huahu)	102.83	33.9147	1.6	3.29	0.22					72			May to Aug, 2009	pelagic (Down site)	Chambers with GC--Diffusive flux	Zhu et al., 2016
Qinghai-Tibet Lake Region	Lake Medo (Lake Huahu)	102.83	33.9147	1.6	3.29	0.25					72			May to Aug, 2009	littoral (Shore site)	Chambers with GC--Diffusive flux	Zhu et al., 2016
Qinghai-Tibet Lake Region	Lake Medo (Lake Huahu)	102.83	33.9147	1.6	3.29	0.24						864.24		May to Aug, 2009	All sites	Chambers with GC	Zhu et al., 2016
Qinghai-Tibet Lake Region	Lake Medo (Lake Huahu)	102.83	33.9147	1.6	3.29	0.21						1032		May to Aug, 2009	Upper site	Chambers with GC	Zhu et al., 2016
Qinghai-Tibet Lake Region	Lake Medo (Lake Huahu)	102.83	33.9147	1.6	3.29	0.26						648		May to Aug, 2009	Central site	Chambers with GC	Zhu et al., 2016
Qinghai-Tibet Lake Region	Lake Medo (Lake Huahu)	102.83	33.9147	1.6	3.29	0.22						792		May to Aug, 2009	Down site	Chambers with GC	Zhu et al., 2016
Qinghai-Tibet Lake Region	Lake Medo (Lake Huahu)	102.83	33.9147	1.6	3.29	0.25						840		May to Aug, 2009	Shore site	Chambers with GC	Zhu et al., 2016
Qinghai-Tibet Lake Region	Kongmoco	90.4529	29.0164	2.8	40.4	18				4772.27				Jul. and Aug. in 1998-2001	Pelagic zone	Diffusion modeling	Yang et al., 2003
Qinghai-Tibet Lake Region	Kongmu Co				39.75					-314.35				Aug-Sep. 2009	Pelagic zone	Diffusion modeling	Lei et al., 2012
Qinghai-Tibet Lake Region	Kusaihu	92.86	35.73	-4.4	254.4	13.3				-340.09				Jul. and Aug. in 1998-2001	Pelagic zone	Diffusion modeling	Yang et al., 2003
Qinghai-Tibet Lake Region	L1				0.5	0.3				214.879				Jul. and Aug. in 1998-2001	Pelagic zone	Diffusion modeling	Yang et al., 2003
Qinghai-Tibet Lake Region	L10				0.5	0.5				-137.087				Jul. and Aug. in 1998-2001	Pelagic zone	Diffusion modeling	Yang et al., 2003
Qinghai-Tibet Lake Region	L11				0.5	0.3				-226.796				Jul. and Aug. in 1998-2001	Pelagic zone	Diffusion modeling	Yang et al., 2003
Qinghai-Tibet Lake Region	Ruoergai Lakes	102.733	34.357									286.8		Jun.-Aug. 2006	littoral	Floating static chambers with GC	Chen et al., 2008
Qinghai-Tibet Lake Region	Ruoergai Lakes	102.733	34.357									50.88		Jun.-Aug. 2006	littoral	Floating static chambers with GC	Chen et al., 2008
Qinghai-Tibet Lake Region	Ruoergai Lakes	102.733	34.357									68.88		May-Sep. 2001	pelagic	Floating static chambers with GC	Wang et al., 2002
Qinghai-Tibet Lake Region	Ruoergai Lakes	102.733	34.357									108.24		May-Sep. 2001	pelagic	Floating static chambers with GC	Wang et al., 2002
Qinghai-Tibet Lake Region	Lake Huahu	102.03	33.1	1.6	3.29	0.25						11.136		Jun.-Aug. 2006	littoral	Floating static chambers with GC	Yao, 2007
Qinghai-Tibet Lake Region	Lake Huahu	102.03	33.1	1.6	3.29	0.25						11.448		Jun.-Aug. 2006	littoral	Floating static chambers with GC	Yao, 2007
Qinghai-Tibet Lake Region	Luanhaizi	101.2	37.4833									59.04		Jul-Sep. 2002	Pelagic	Chamber with GC	Hirota et al., 2004
Qinghai-Tibet Lake Region	L12				0.5	0.3				179.626				Jul. and Aug. in 1998-2001	Pelagic zone	Diffusion modeling	Yang et al., 2003
Qinghai-Tibet Lake Region	L2				0.5	0.6				-72.7316				Jul. and Aug. in 1998-2001	Pelagic zone	Diffusion modeling	Yang et al., 2003
Qinghai-Tibet Lake Region	L3				0.5	0.2				-427.546				Jul. and Aug. in 1998-2001	Pelagic zone	Diffusion modeling	Yang et al., 2003
Qinghai-Tibet Lake Region	L4				0.5	0.2				-423.603				Jul. and Aug. in 1998-2001	Pelagic zone	Diffusion modeling	Yang et al., 2003
Qinghai-Tibet Lake Region	L5				0.5	0.5				-433.694				Jul. and Aug. in 1998-2001	Pelagic zone	Diffusion modeling	Yang et al., 2003
Qinghai-Tibet Lake Region	L6				0.5	0.5				-423.48				Jul. and Aug. in 1998-2001	Pelagic zone	Diffusion modeling	Yang et al., 2003
Qinghai-Tibet Lake Region	L7				0.5	0.4				-433.709				Jul. and Aug. in 1998-2001	Pelagic zone	Diffusion modeling	Yang et al., 2003
Qinghai-Tibet Lake Region	L8				0.5	0.2				248.88				Jul. and Aug. in 1998-2001	Pelagic zone	Diffusion modeling	Yang et al., 2003
Qinghai-Tibet Lake Region	L9				0.5	0.5				-247.374				Jul. and Aug. in 1998-2001	Pelagic zone	Diffusion modeling	Yang et al., 2003
Qinghai-Tibet Lake Region	Lake Gahai	102.167	34.25	4.7	431.8	2.4	3.473	0.013	12.177	3292.08		11.952	0.048	Jul. 2011-Jul. 2012	pelagic	Floating static chambers with GC	Ma et al., 2015
Qinghai-Tibet Lake Region	Lake Gahai	102.167	34.25	4.7	431.8	2.4	3.473	0.013	12.177	10879		5.592	2.256	Jul. 2011-Jul. 2012	littoral	Floating static chambers with GC	Ma et al., 2015
Qinghai-Tibet Lake Region	Lake Gahai	102.167	34.25	4.7	431.8	2.4	3.473	0.013	12.177	11947.4		3.768	-0.192	Jul. 2011-Jul. 2012	littoral	Floating static chambers with GC	Ma et al., 2015
Qinghai-Tibet Lake Region	Lake Gahai	97.55	37.1333	4.7	44.7	10				1788.81				2006-2007	Pelagic zone	Diffusion modeling	Xu et al., 2010
Qinghai-Tibet Lake Region	Lake Gahai	97.55	37.1333	4.7	44.7	10				761.531				2006-2007	Pelagic zone	Diffusion modeling	Xu et al., 2010
Qinghai-Tibet Lake Region	Lake Hala	97.59	38.29	-4.7	625	65				-230.56	0.088			2018.10.		headspace-equilibrium method	Lei Wang et al., 2022
Qinghai-Tibet Lake Region	Lake Qinghai	100.221	36.9097	0.9	4500	20	1.94	1.44	14.49	-56.76	0.56			2018.10.		headspace-equilibrium method	Lei Wang et al., 2022
Qinghai-Tibet Lake Region	Lake Qinghai-Autumn	100.5	36.59	0.9	4432	21	1.94	1.44	14.49					2013.12-2017.12		eddy covariance system	Xiao-Yan Li et al., 2022
Qinghai-Tibet Lake Region	Lake Qinghaihu	100.183	36.9667	0.9	4340	23	1.94	1.44	14.49	1236.84				2006-2007	Pelagic zone	Diffusion modeling	Xu et al., 2010
Qinghai-Tibet Lake Region	Lake Qinghaihu	100.183	36.9667	0.9	4340	23	1.94	1.44	14.49	376.841				2006-2007	Pelagic zone	Diffusion modeling	Xu et al., 2010
Qinghai-Tibet Lake Region	Lake Qinghaihu	100.183	36.9667	0.9	4340	23	1.94	1.44	14.49	326.508				2006-2007	Pelagic zone	Diffusion modeling	Xu et al., 2010
Qinghai-Tibet Lake Region	Lake Qinghaihu	100.183	36.9667	0.9	4340	23	1.94	1.44	14.49	870.448				2006-2007	Pelagic zone	Diffusion modeling	Xu et al., 2010
Qinghai-Tibet Lake Region	Lake Qinghaihu	100.183	36.9667	0.9	4340	23	1.94	1.44	14.49	165.028				2006-2007	Pelagic zone	Diffusion modeling	Xu et al., 2010
Qinghai-Tibet Lake Region	Lake Qinghaihu	100.183	36.9667	0.9	4340	23	1.94	1.44	14.49	377.942				2006-2007	Pelagic zone	Diffusion modeling	Xu et al., 2010
Qinghai-Tibet Lake Region	Lake Qinghaihu	100.183	36.9667	0.9	4340	23	1.94	1.44	14.49	359.069				2006-2007	Pelagic zone	Diffusion modeling	Xu et al., 2010
Qinghai-Tibet Lake Region	Lake Qinghaihu	100.183	36.9667	0.9	4340	23	1.94	1.44	14.49	558.938				2006-2007	Pelagic zone	Diffusion modeling	Xu et al., 2010
Qinghai-Tibet Lake Region	Lake Qinghaihu	100.183	36.9667	0.9	4340	23	1.94	1.44	14.49	1852.82				2006-2007	Pelagic zone	Diffusion modeling	Xu et al., 2010
Qinghai-Tibet Lake Region	Lake Qinghaihu	100.183	36.9667	0.9	4340	23	1.94	1.44	14.49	335.324				2006-2007	Pelagic zone	Diffusion modeling	Xu et al., 2010
Qinghai-Tibet Lake Region	Lake Qinghaihu	100.183	36.9667	0.9	4340	23	1.94	1.44	14.49	366.928				2006-2007	Pelagic zone	Diffusion modeling	Xu et al., 2010
Qinghai-Tibet Lake Region	Lake Qinghai-ice-covered period	100.5	36.59	0.9	4432	21								2013.12-2017.12		eddy covariance system	Xiao-Yan Li et al., 2022
Qinghai-Tibet Lake Region	Lake Qinghai-ice-free period	100.5	36.59	0.9	4432	21								2013.12-2017.12		eddy covariance system	Xiao-Yan Li et al., 2022
Qinghai-Tibet Lake Region	Lake Qinghai-Spring	100.5	36.59	0.9	4432	21								2013.12-2017.12		eddy covariance system	Xiao-Yan Li et al., 2022
Qinghai-Tibet Lake Region	Lake Qinghai-Summer	100.5	36.59	0.9	4432	21				366				2013.12-2017.12		eddy covariance system	Xiao-Yan Li et al., 2022
Qinghai-Tibet Lake Region	Lake Qinghai-Winter	100.5	36.59	0.9	4432	21								2013.12-2017.12		eddy covariance system	Xiao-Yan Li et al., 2022
Qinghai-Tibet Lake Region	Langco	87.393	29.203	2.9	12.1	29			2	1387.27				Jul. and Aug. in 1998-2001	Pelagic zone	Diffusion modeling	Yang et al., 2003
Qinghai-Tibet Lake Region	Lhanag Tso	81.2958	30.6355	0.2	268.5	32.5				360.8	396.8		0.0484	2015.5	littoral zone	headspace-equilibrium method	Fangping Yan et al., 2018
Qinghai-Tibet Lake Region	Mapam Yumco	81.3681	30.7103	0.2	412	44.8	0.62			3357.2	137.6		0.198	2015.5	littoral zone	headspace-equilibrium method	Fangping Yan et al., 2018
Qinghai-Tibet Lake Region	Merqung Co	84.6	31	-0.4	62.2	1.8				1699.41				Aug-Sep. 2009	Pelagic zone	Diffusion modeling	Lei et al., 2012
Qinghai-Tibet Lake Region	Namoco	90.5833	30.6667	-0.6	1864	16.5	0.3693	0.030733	0.997113	-382.09				Jul. and Aug. in 1998-2001	Pelagic zone	Diffusion modeling	Yang et al., 2003
Qinghai-Tibet Lake Region	Ngangla Ringco	83.0833	31.55	-1	542.89	10				349.92				Aug-Sep. 2009	Pelagic zone	Diffusion modeling	Lei et al., 2012
Qinghai-Tibet Lake Region	Ngoring Lake	97.7524	34.0833	-2.8	610	0.547	0.02			1619.2	6.4		0.1936	2014.8	littoral zone	headspace-equilibrium method	Fangping Yan et al., 2018
Qinghai-Tibet Lake Region	Nieer Co	82.2354	32.233		33					6881.6	1.44		0.2332	2015.5	littoral zone	headspace-equilibrium method	Fangping Yan et al., 2018
Qinghai-Tibet Lake Region	Norma Tso	88.064	32.398	-1.8	68.1	4.3	0.9423	0.0647	1.28918	2068	3.04		0.1144	2015.5	littoral zone	headspace-equilibrium method	Fangping Yan et al., 2018
Qinghai-Tibet Lake Region	Pung Co	90.9667	31.5	-0.8	172.11	12.2	0.904833	0.1437	0.91154	736.183				Aug-Sep. 2009	Pelagic zone	Diffusion modeling	Lei et al., 2012
Qinghai-Tibet Lake Region	Qigai Co									-430.886				Aug-Sep. 2009	Pelagic zone	Diffusion modeling	Lei et al., 2012
Qinghai-Tibet Lake Region	Qinghai Lake-1	100.538	36.5762	0.9	4236.6	21	1.94	0.02	14.49	1966.8	7.2		0.0352	2014.8	littoral zone	headspace-equilibrium method	Fangping Yan et al., 2018
Qinghai-Tibet Lake Region	Qinghai Lake-2	100.221	36.9097	0.9	4236.6	21	1.94	0.02	14.49	2873.2	28.8		0.0616	2014.8	littoral zone	headspace-equilibrium method	Fangping Yan et al., 2018
Qinghai-Tibet Lake Region	Qinghaihu	100.183	36.9667	0.9	4340	23				2346.97				Jul. and Aug. in 1998-2001	Pelagic zone	Diffusion modeling	Yang et al., 2003
Qinghai-Tibet Lake Region	Qingmuke Co				6					-129.737				Aug-Sep. 2009	Pelagic zone	Diffusion modeling	Lei et al., 2012
Qinghai-Tibet Lake Region	Qingshuihu	80.152	34.75		2.9	7.5			5	-428.679				Jul. and Aug. in 1998-2001	Pelagic zone	Diffusion modeling	Yang et al., 2003
Qinghai-Tibet Lake Region	Rinqin Xubco	83.4333	31.2667	-1.1	188.36	18.8				217.423				Aug-Sep. 2009	Pelagic zone	Diffusion modeling	Lei et al., 2012
Qinghai-Tibet Lake Region	Ruoergai wetland	102.733	34.357							5060.64		60.72	0.84	2003	pelagic	Floating static chambers with GC	Wang, 2010
Qinghai-Tibet Lake Region	Ruoergai wetland	102.733	34.357							4809.6		60.96	0.24	2004	pelagic	Floating static chambers with GC	Wang, 2010
Qinghai-Tibet Lake Region	Ruoergai wetland	102.733	34.357							4761.6		53.28	0.336	2005	pelagic	Floating static chambers with GC	Wang, 2010
Qinghai-Tibet Lake Region	Saline lakes on QTP in annual (373)																Xiao-Yan Li et al., 2022
Qinghai-Tibet Lake Region	Saline lakes on QTP in ice-covered period (373)									11183.3							Xiao-Yan Li et al., 2022
Qinghai-Tibet Lake Region	Saline lakes on QTP in ice-free period (373)									36.67							Xiao-Yan Li et al., 2022
Qinghai-Tibet Lake Region	Saline lakes on QTP in summer (373)									1576.67							Xiao-Yan Li et al., 2022
Qinghai-Tibet Lake Region	Saline lakes on QTP in winter (373)									10413.3							Xiao-Yan Li et al., 2022
Qinghai-Tibet Lake Region	Serbug Co	88.169	32.009	-0.3	80.9	4.9	0.927	0.0436	0.516229	148.217				Aug-Sep. 2009	Pelagic zone	Diffusion modeling	Lei et al., 2012
Qinghai-Tibet Lake Region	Serling Co	88.873	31.773	-0.5	2391	28	0.731767	0.031867	2.31606	10793.2	0.64		0.7524	2015.5	littoral zone	headspace-equilibrium method	Fangping Yan et al., 2018
Qinghai-Tibet Lake Region	Suganhu	93.88	38.87	2.5	106	3.5				9582.07				Jul. and Aug. in 1998-2001	Pelagic zone	Diffusion modeling	Yang et al., 2003
Qinghai-Tibet Lake Region	Tanggulasan				6.7	1.6				-254.545				Jul. and Aug. in 1998-2001	Pelagic zone	Diffusion modeling	Yang et al., 2003
Qinghai-Tibet Lake Region	Taro Co	84.1167	31.1333	0.2	486.62	34.1			3.7	141.24				Aug-Sep. 2009	Pelagic zone	Diffusion modeling	Lei et al., 2012
Qinghai-Tibet Lake Region	Tuosuhai	96.9686	37.1186	4.7	165.9	14	2.32	0.07	12.31	8058.83				Jul. and Aug. in 1998-2001	Pelagic zone	Diffusion modeling	Yang et al., 2003
Qinghai-Tibet Lake Region	Xinco	94.2386	30.0293	4.8	3.3	1				524.936				Jul. and Aug. in 1998-2001	Pelagic zone	Diffusion modeling	Yang et al., 2003
Qinghai-Tibet Lake Region	Xingxinghai	100.538	36.5762	0.9	26.28	16.8			6.6	1390.4	83.2		0.2332	2014.8	littoral zone	headspace-equilibrium method	Fangping Yan et al., 2018
Qinghai-Tibet Lake Region	Xionouco				2.3	0.2				-426.668				Jul. and Aug. in 1998-2001	Pelagic zone	Diffusion modeling	Yang et al., 2003
Qinghai-Tibet Lake Region	Yamdrok Co	90.867	28.948	2.8	650.48	23.6			0.1	460.303				Aug-Sep. 2009	Pelagic zone	Diffusion modeling	Lei et al., 2012
Qinghai-Tibet Lake Region	Yamzho Yumco	90.5213	29.169	2.8	650.5	28.2	0.34	0.01	1	3300	19.2		0.264	2015.5	littoral zone	headspace-equilibrium method	Fangping Yan et al., 2018
Qinghai-Tibet Lake Region	Yangzuyongco	90.7327	28.9635	2.8	638	25.3	0.887	0.005		-221.813				Jul. and Aug. in 1998-2001	Pelagic zone	Diffusion modeling	Yang et al., 2003
Qinghai-Tibet Lake Region	Youbu Co	86.6667	35.7333	-6.4	63.19	13.1				1617.75				Aug-Sep. 2009	Pelagic zone	Diffusion modeling	Lei et al., 2012
Qinghai-Tibet Lake Region	Zhaixi Co	84.93	32.19	0.1	47.47	2.3				5243.98				Aug-Sep. 2009	Pelagic zone	Diffusion modeling	Lei et al., 2012
Qinghai-Tibet Lake Region	Zhari Nam Co	85.4082	31.0795	0.1	996.9	25	2.78	1.86	19.19	3656.4	2.56		0.2112	2015.5	19.19	headspace-equilibrium method	Fangping Yan et al., 2018
Qinghai-Tibet Lake Region	Zhari Namco	85.6167	30.9	0.1	990.26	25	25	2.78	1.86	625.303				Aug-Sep. 2009	19.19	Diffusion modeling	Lei et al., 2012
Qinghai-Tibet Lake Region	Zige Tangco	90.8333	32.0667	-1.7	225.55	12.7			0.8	207.051				Aug-Sep. 2009	Pelagic zone	Diffusion modeling	Lei et al., 2012
Yunnan-Guizhou Lake Region	Average of 4 lakes									475.2					Pelagic zone	Diffusion modeling	Wang et al., 2003
Yunnan-Guizhou Lake Region	Baihua	106.526	26.6557	15.9	11.81	18.7	2.178	0.036	6.24	1264.32				Oct. 2015	Pelagic zone	Modeling using pH and alkalinity	Siyue Li et al., 2018
Yunnan-Guizhou Lake Region	Caohai	104.248	26.8486	11.7	25	2.4	2.29833	0.0608333		647.52				1990s	Pelagic zone	Diffusion modeling	Wang and Du, 1998
Yunnan-Guizhou Lake Region	Changqiaohai	103.373	23.4415	19.8	10.7	3.74				-563.52				1990s	Pelagic zone	Diffusion modeling	Wang and Du, 1998
Yunnan-Guizhou Lake Region	Chenghai	100.65	26.55	18.5	77.2	25.7	0.582857	0.0272619	7.99603	-502.56				2000s	Pelagic zone	Diffusion modeling	Wang and Du, 1998
Yunnan-Guizhou Lake Region	Chenghai	100.65	26.55	18.5	77.2	25.7	0.65	0.0166667	6	-45.12				Oct. 2015	Pelagic zone	Modeling using pH and alkalinity	Siyue Li et al., 2018
Yunnan-Guizhou Lake Region	Dalongtan	98.5593	25.1304		0.008	10				3006.96				Nov. 1992	Pelagic zone	Diffusion modeling	Wang and Du, 1998
Yunnan-Guizhou Lake Region	Datunhai	103.319	23.426	19.9	12.33	3.7	0.67	0.03	28.7002	-464.88				2000s	Pelagic zone	Diffusion modeling	Wang and Du, 1998
Yunnan-Guizhou Lake Region	Dianchi	102.683	24.85	16.1	298	2.93	1.7324	0.134813	57.9896	456.192		3.73248		2013	Pelagic zone	Floating static chambers with GC	Liu et al., 2013
Yunnan-Guizhou Lake Region	Dianchi	102.683	24.85	16.1	298.34	5	1.58	0.130375	57.375	1335.6				Oct. 2015	Pelagic zone	Modeling using pH and alkalinity	Siyue Li et al., 2018
Yunnan-Guizhou Lake Region	Erhai	100.2	25.7833	15.7	249	10.17	0.491061	0.022595	6.55379	-53.2224		11.1974	-0.0239501	2013	Pelagic zone	Floating static chambers with GC	Liu et al., 2013
Yunnan-Guizhou Lake Region	Er'hai	100.2	25.7833	15.7	249	10.17	0.490909	0.0308636	9.71818	618				Oct. 2015	Pelagic zone	Modeling using pH and alkalinity	Siyue Li et al., 2018
Yunnan-Guizhou Lake Region	Erhai 1	100.2	25.7833	15.7	5	10.5				-313.907				Jul. and Aug. in 1998-2001	Pelagic zone	Diffusion modeling	Yang et al., 2003
Yunnan-Guizhou Lake Region	Erhai 2	100.2	25.7833	15.7	5	10.5				447.196				Jul. and Aug. in 1998-2001	Pelagic zone	Diffusion modeling	Yang et al., 2003
Yunnan-Guizhou Lake Region	Erhai Lake-Annual	100.167	25.767	15.7	256.5	10	0.491061	0.022595	6.55379	1603.29				2012	Pelagic zone	eddy covariance	Qun Du et al., 2018
Yunnan-Guizhou Lake Region	Erhai Lake-Annual	100.167	25.767	15.7	256.5	10	0.491061	0.022595	6.55379	1570.14				2013	Pelagic zone	eddy covariance	Qun Du et al., 2018
Yunnan-Guizhou Lake Region	Erhai Lake-Annual	100.167	25.767	15.7	256.5	10	0.469583	0.0215833	7.24167	1523.93				2014	Pelagic zone	eddy covariance	Qun Du et al., 2018
Yunnan-Guizhou Lake Region	Erhai Lake-Annual	100.167	25.767	15.7	256.5	10	0.4625	0.021375	5.55	1180.37				2015	Pelagic zone	eddy covariance	Qun Du et al., 2018
Yunnan-Guizhou Lake Region	Erhai Lake-Monthly	100.167	25.767	15.7	256.5	10	0.515	0.0175	5.7	1900.8				Jan	Pelagic zone	eddy covariance	Qun Du et al., 2018
Yunnan-Guizhou Lake Region	Erhai Lake-Monthly	100.167	25.767	15.7	256.5	10	0.5	0.018	6.7	2395.01				Feb	Pelagic zone	eddy covariance	Qun Du et al., 2018
Yunnan-Guizhou Lake Region	Erhai Lake-Monthly	100.167	25.767	15.7	256.5	10	0.38	0.0145	6	2280.96				Mar	Pelagic zone	eddy covariance	Qun Du et al., 2018
Yunnan-Guizhou Lake Region	Erhai Lake-Monthly	100.167	25.767	15.7	256.5	10	0.58	0.0135	4.6	1710.72				Apr	Pelagic zone	eddy covariance	Qun Du et al., 2018
Yunnan-Guizhou Lake Region	Erhai Lake-Monthly	100.167	25.767	15.7	256.5	10	0.43	0.0145	8.5	1672.7				May	Pelagic zone	eddy covariance	Qun Du et al., 2018
Yunnan-Guizhou Lake Region	Erhai Lake-Monthly	100.167	25.767	15.7	256.5	10	0.38	0.0195	4	874.368				Jun	Pelagic zone	eddy covariance	Qun Du et al., 2018
Yunnan-Guizhou Lake Region	Erhai Lake-Monthly	100.167	25.767	15.7	256.5	10	0.475	0.0265	4.8	-760.32				Jul	Pelagic zone	eddy covariance	Qun Du et al., 2018
Yunnan-Guizhou Lake Region	Erhai Lake-Monthly	100.167	25.767	15.7	256.5	10	0.47	0.033	9.7	1672.7				Aug	Pelagic zone	eddy covariance	Qun Du et al., 2018
Yunnan-Guizhou Lake Region	Erhai Lake-Monthly	100.167	25.767	15.7	256.5	10	0.47	0.0325	9.8	3003.26				Sep	Pelagic zone	eddy covariance	Qun Du et al., 2018
Yunnan-Guizhou Lake Region	Erhai Lake-Monthly	100.167	25.767	15.7	256.5	10	0.45	0.028	10	2547.07				Oct	Pelagic zone	eddy covariance	Qun Du et al., 2018
Yunnan-Guizhou Lake Region	Erhai Lake-Monthly	100.167	25.767	15.7	256.5	10	0.465	0.0175	7.9	76.032				Nov	Pelagic zone	eddy covariance	Qun Du et al., 2018
Yunnan-Guizhou Lake Region	Erhai Lake-Monthly	100.167	25.767	15.7	256.5	10	0.52	0.024	9.2	228.096				Dec	Pelagic zone	eddy covariance	Qun Du et al., 2018
Yunnan-Guizhou Lake Region	Fuxian	102.883	24.4833	17.5	211	89.6	0.154167	0.005	2.15333	456.192		0.262656	-0.0239501	2013	Pelagic zone	Floating static chambers with GC	Liu et al., 2013
Yunnan-Guizhou Lake Region	Fuxianhu	102.883	24.4833	17.5	211	89.6	0.12	0.005	2.72	-4.8				Oct. 2015	Pelagic zone	Modeling using pH and alkalinity	Siyue Li et al., 2018
Yunnan-Guizhou Lake Region	Lake Dianchi	102.683	24.85	16.1	298	2.93	2.98	0.13	116.2	-430.56		3.912		Dec. 2004 to Jan.2005	Pelagic zone	Floating static chambers with GC	Chen et al., 2006; 2007
Yunnan-Guizhou Lake Region	Lake Dianchi	102.683	24.85	16.1	297.9	2.93	1.67	0.108667	72	-440.16		3.672		Dirunal sampling (Jan. 2005)	Pelagic zone	Floating static chambers with GC	Li XH, 2005
Yunnan-Guizhou Lake Region	Lake Erhai	100.2	25.7833	15.7	249	10.17	0.47	0.03	17.95	-585.12		1.056		Dec. 2004 to Jan.2005	Pelagic zone	Floating static chambers with GC	Chen et al., 2006; 2007
Yunnan-Guizhou Lake Region	Lake Erhai	100.2	25.7833	15.7	249	10.17	0.47875	0.01875	6.55379	-54.24		11.16	-0.0048	Dirunal sampling (Jan. 2005)	Pelagic zone	Floating static chambers with GC	Li XH, 2005
Yunnan-Guizhou Lake Region	Lake Erhai	100.2	25.7833	15.7	249	10.17	0.491061	0.022595	6.55379	-236.448				2006-2007	Pelagic zone	Diffusion modeling	Xu et al., 2010
Yunnan-Guizhou Lake Region	Lake Erhai	100.2	25.7833	15.7	249	10.17	0.491061	0.022595	6.55379	-210.351				2006-2007	Pelagic zone	Diffusion modeling	Xu et al., 2010
Yunnan-Guizhou Lake Region	Lake Fuxianhu	102.883	24.4833	17.5	211	89.6	0.57	0.017	2.06	-637.44		0.288		Dec. 2004 to Jan.2005	Pelagic zone	Floating static chambers with GC	Chen et al., 2006; 2007
Yunnan-Guizhou Lake Region	Lake Fuxianhu	102.883	24.4833	17.5	211	89.6	0.16	0.005	1.93	446.16		0.264	-0.024	Dirunal sampling (Jan. 2005)	Pelagic zone	Floating static chambers with GC	Li XH, 2005
Yunnan-Guizhou Lake Region	Longshuihu									-555.84		16.32		Aug. 2017	Pelagic zone	Floating chamber	Siyue Li et al., 2018
Yunnan-Guizhou Lake Region	Luguhu	100.783	27.7167	11.7	48.5	40				-192.72				2000s	Pelagic zone	Diffusion modeling	Wang and Du, 1998
Yunnan-Guizhou Lake Region	Mahu lake	103.789	28.4158	14.1	9.19	3.5				504.72				2000s	Pelagic zone	Diffusion modeling	Wang and Du, 1998
Yunnan-Guizhou Lake Region	Qihai	102.3	27.8167	17.9	31	10.3		0.209	0.65	885.84				1989	Pelagic zone	Diffusion modeling	Wang and Du, 1998
Yunnan-Guizhou Lake Region	Qiluhu	102.779	24.1603	17.4	36.9	4				-548.4				Oct. 1993	Pelagic zone	Diffusion modeling	Wang and Du, 1998
Yunnan-Guizhou Lake Region	Lake Napahai	99.65	27.8667		31							13.44		May, July, Septermber and November 2011	Pelagic	Floating static chambers with GC	Xie et al., 2015
Yunnan-Guizhou Lake Region	Lake Napahai	99.65	27.8667		31							13.68		May, July, Septermber and November 2011	Littoral	Floating static chambers with GC	Xie et al., 2015
Yunnan-Guizhou Lake Region	Qiluhu	102.779	24.1603	17.4	36.9	4	5.43	0.049	113.41	596.88				Oct. 2015	Pelagic zone	Modeling using pH and alkalinity	Siyue Li et al., 2018
Yunnan-Guizhou Lake Region	Qinghai	98.5667	25.1333		0.25					16191.1				Nov. 1992	Pelagic zone	Diffusion modeling	Wang and Du, 1998
Yunnan-Guizhou Lake Region	Qingshuihai	103.117	25.5989	13.9	7.2	20				1141.92				2000s	Pelagic zone	Diffusion modeling	Wang and Du, 1998
Yunnan-Guizhou Lake Region	Shuanghehu									-454.56		4.656		Aug. 2017	Pelagic zone	Floating chamber	Siyue Li et al., 2018
Yunnan-Guizhou Lake Region	Xingyunhu	102.767	24.3333	17.9	34.7	5.3				-444.96				Oct. 1993	Pelagic zone	Diffusion modeling	Wang and Du, 1998
Yunnan-Guizhou Lake Region	Xingyunhu	102.79	24.3429	17.9	34.08	12.6	2.89	0.373	35.09	5070.48				Oct. 2015	Pelagic zone	Modeling using pH and alkalinity	Siyue Li et al., 2018
Yunnan-Guizhou Lake Region	Xinluhai	99.1	31.8333		3.33	31				745.44				1977	Pelagic zone	Diffusion modeling	Wang and Du, 1998
Yunnan-Guizhou Lake Region	Yangzhonghai	103.019	24.9342	16.5	30.55	39.2	0.58	0.034	16	183.6				Oct. 2015	Pelagic zone	Modeling using pH and alkalinity	Siyue Li et al., 2018
Yunnan-Guizhou Lake Region	Yangzonghai	103.019	24.9342	16.5	31.7	19.5				702.96				Nov. 1993	Pelagic zone	Diffusion modeling	Wang and Du, 1998
Yunnan-Guizhou Lake Region	Yilonghu	102.567	23.6667	19.6	38	2.4				-291.36				1993	Pelagic zone	Diffusion modeling	Wang and Du, 1998
